# Supplementary material for: Archaeometric studies on rock art at four sites in the northeastern Great Basin of North America
Source: PubMed Central journal article supplement (PMC8791535; doi:10.1371/journal.pone.0263189), 2022-01-26

# CP 2102 & 2226

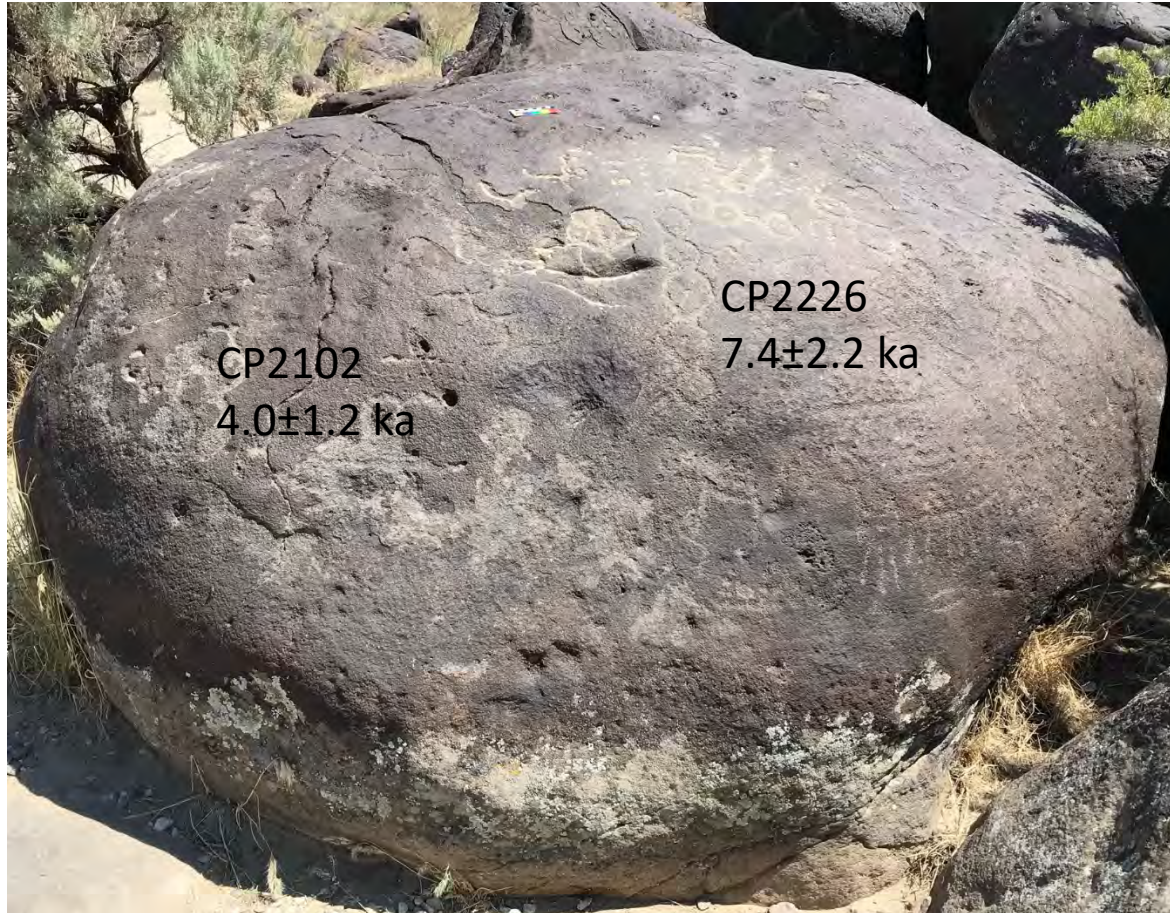

CP2102  
4.0±1.2 ka

CP2226  
7.4±2.2 ka

CP 2102

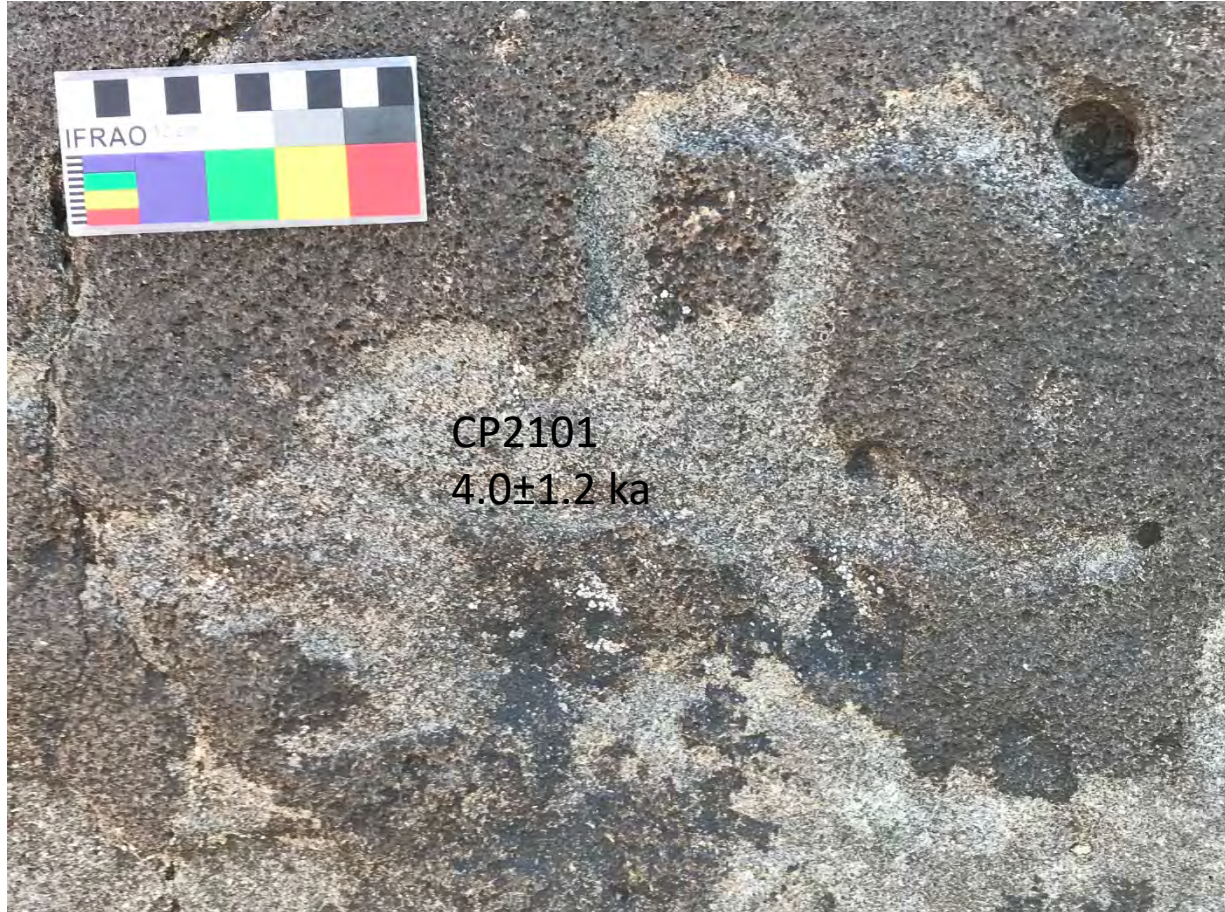

CP 2108

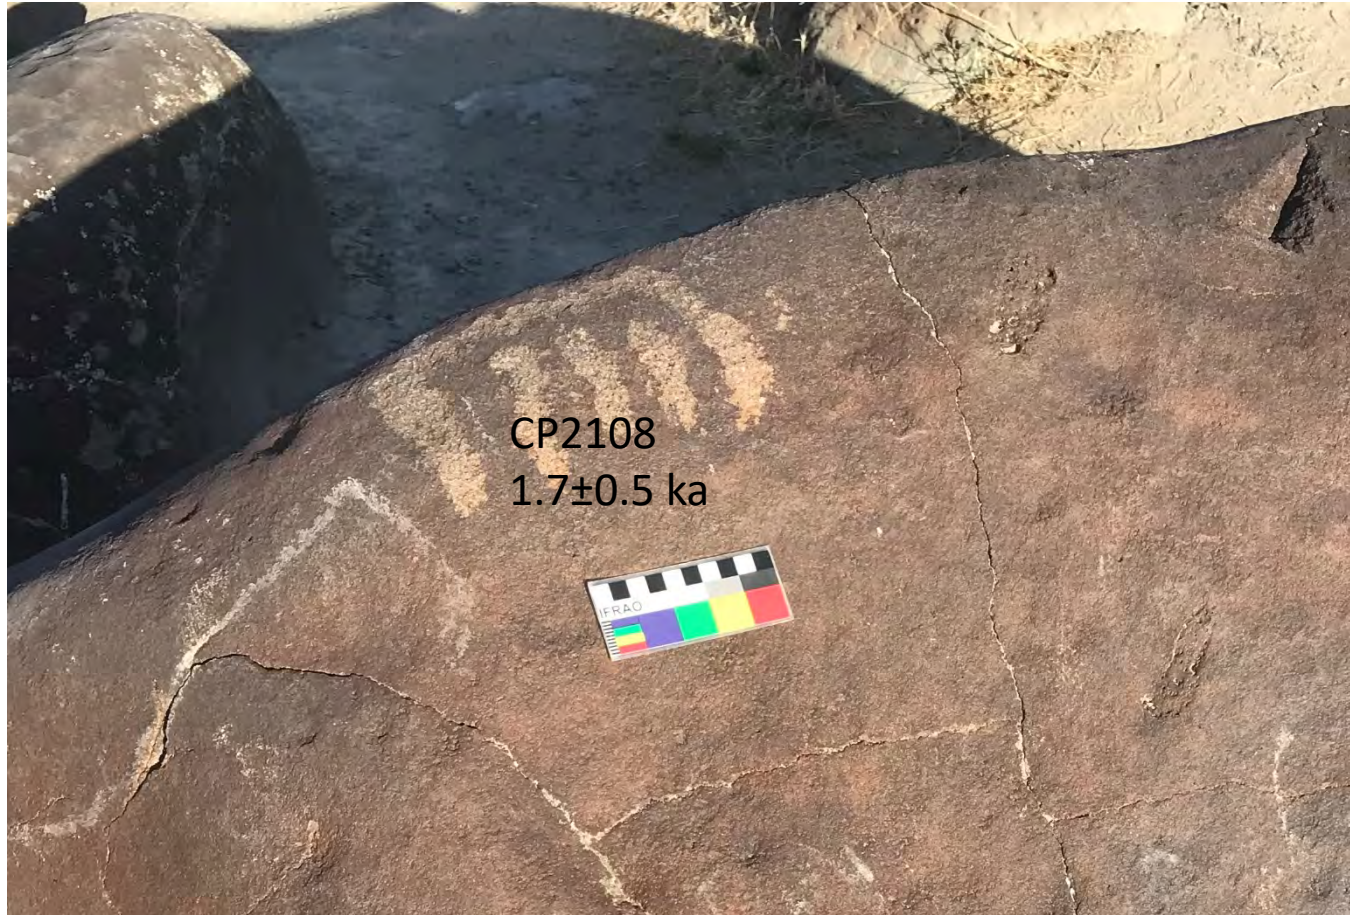

CP 2114

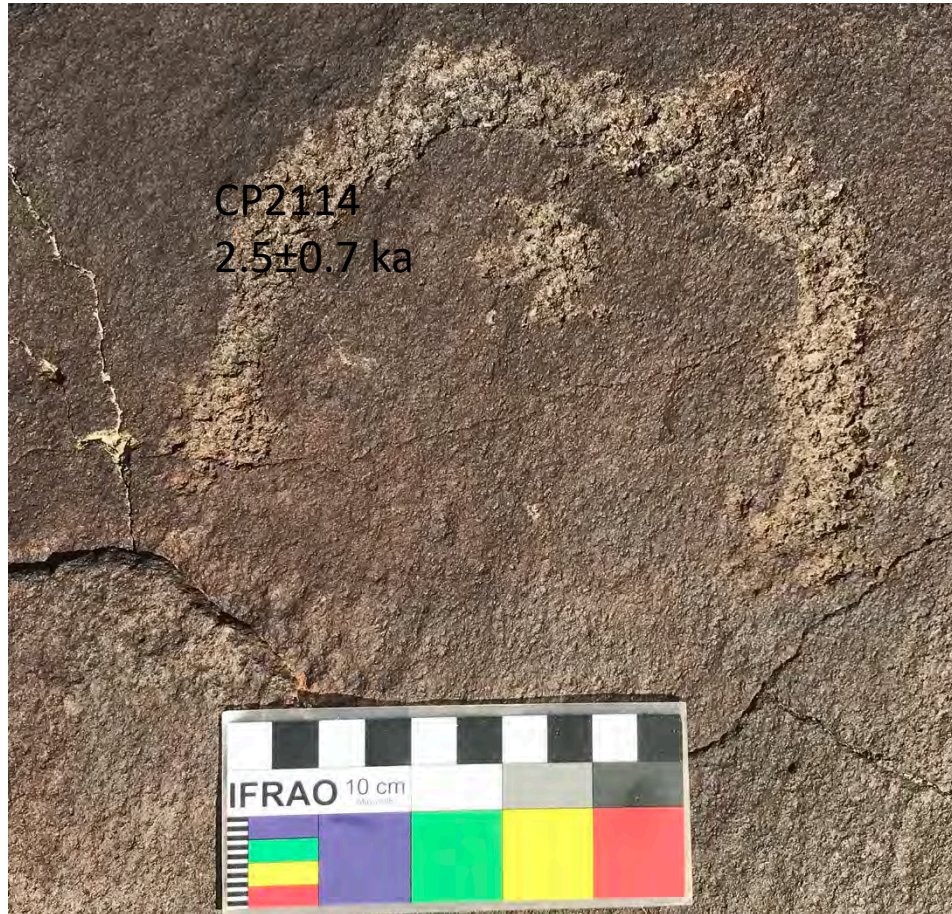

# CP 2120 & 2127

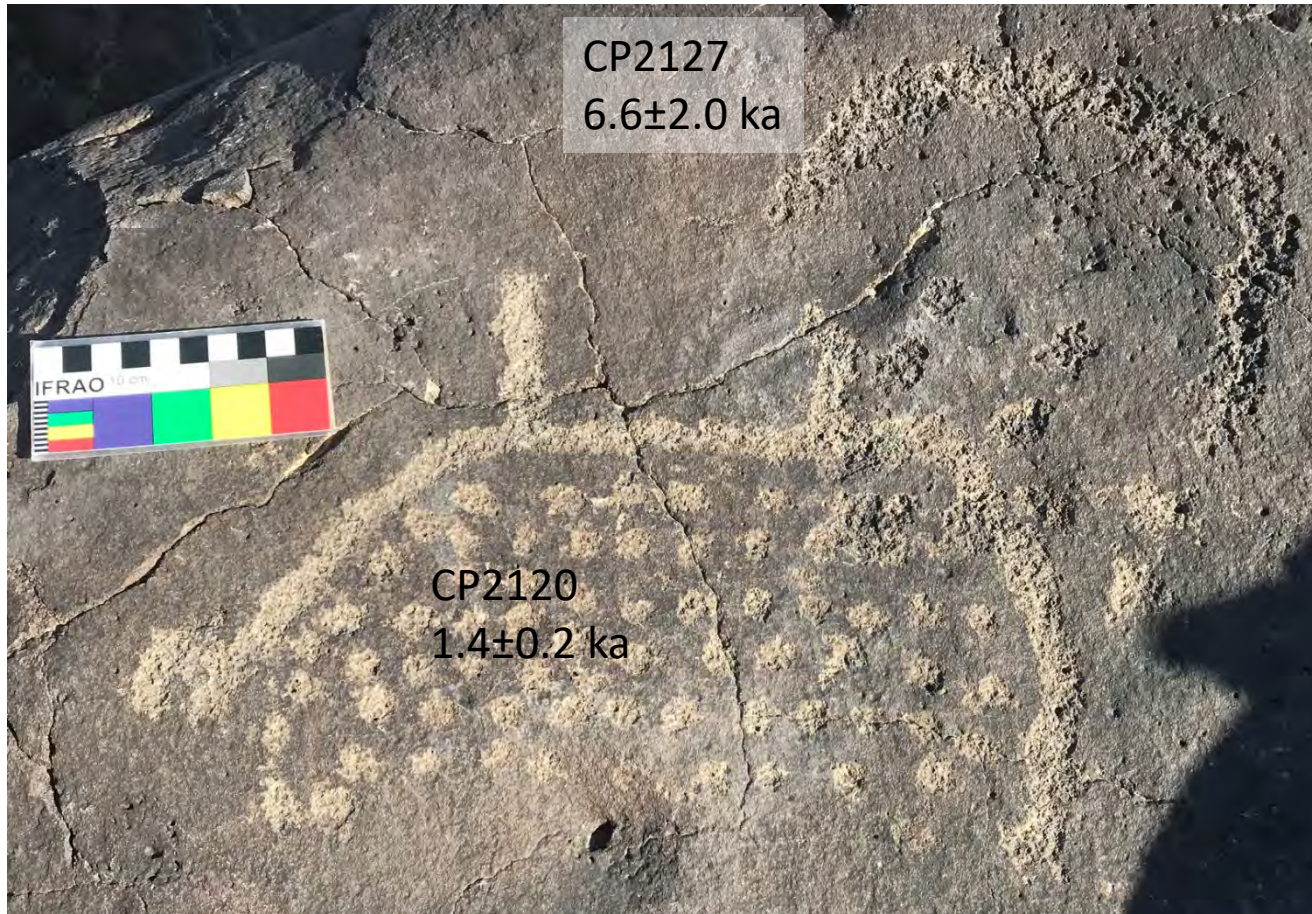

CP 2133

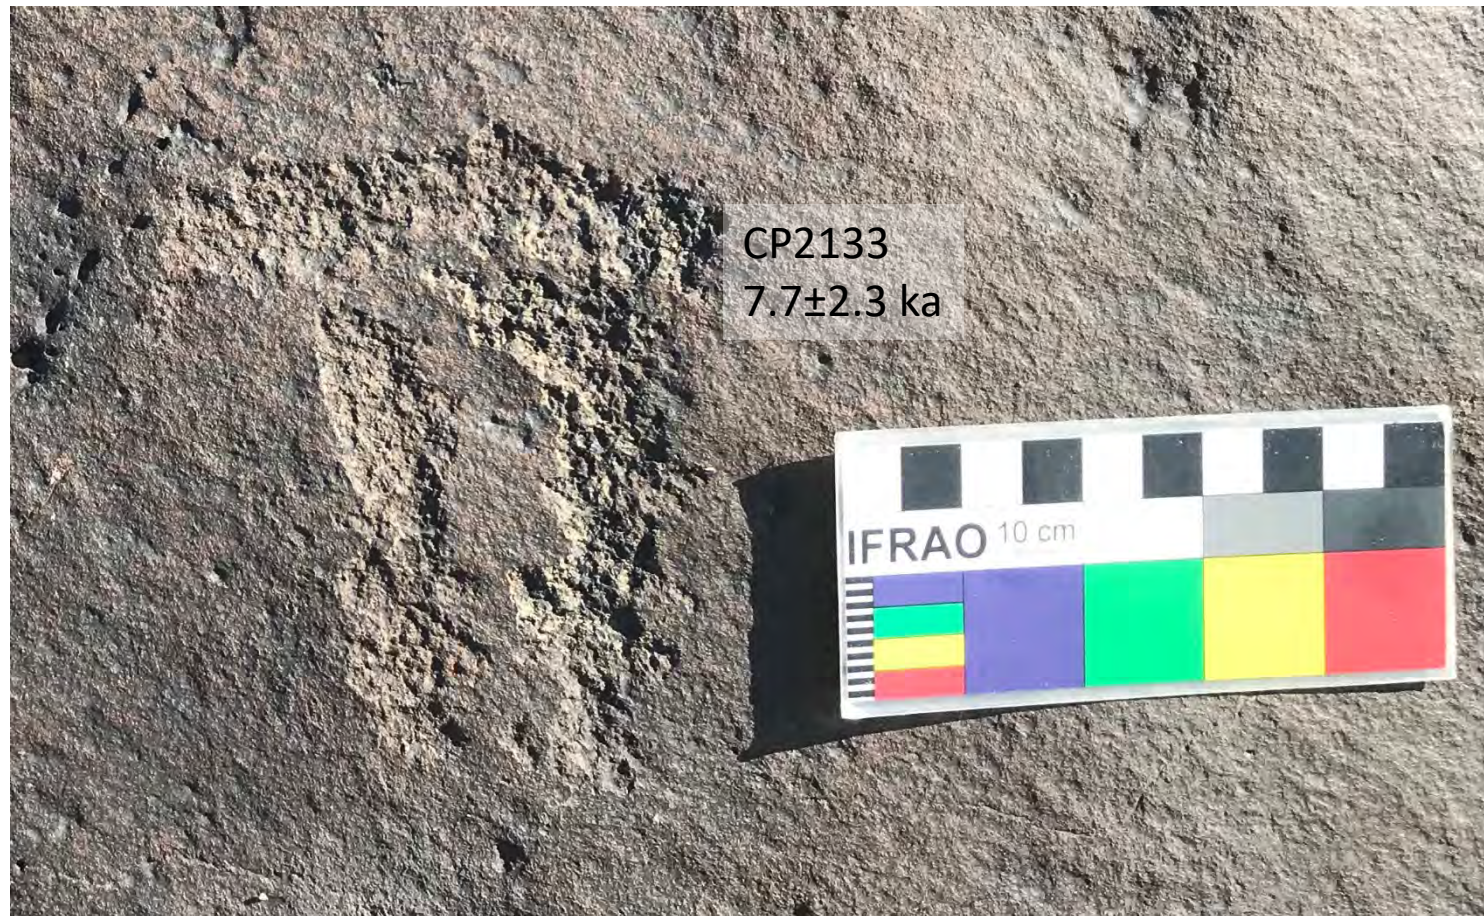

# CP 2140 & 2146

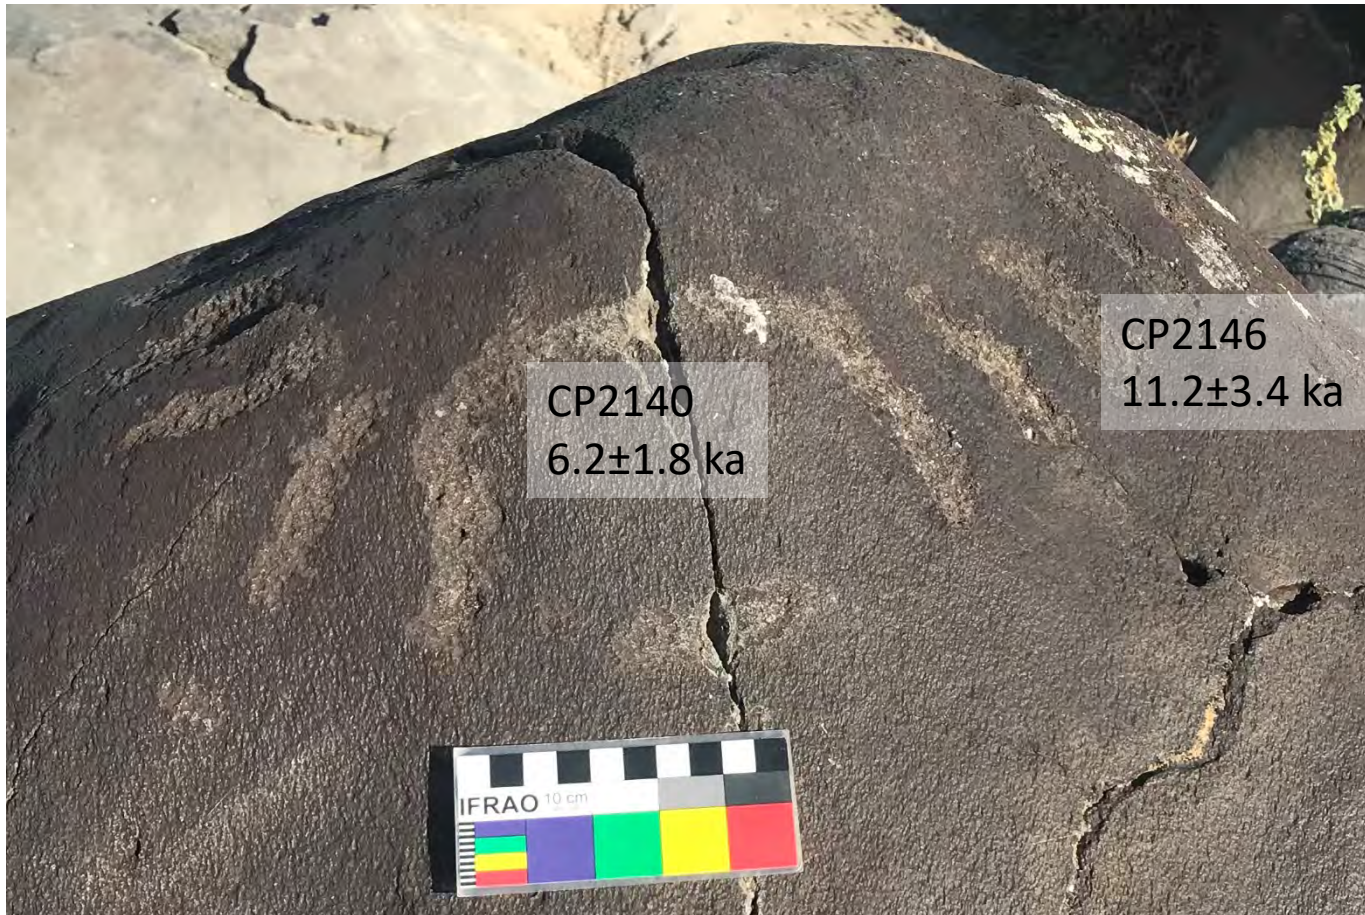

CP 2152

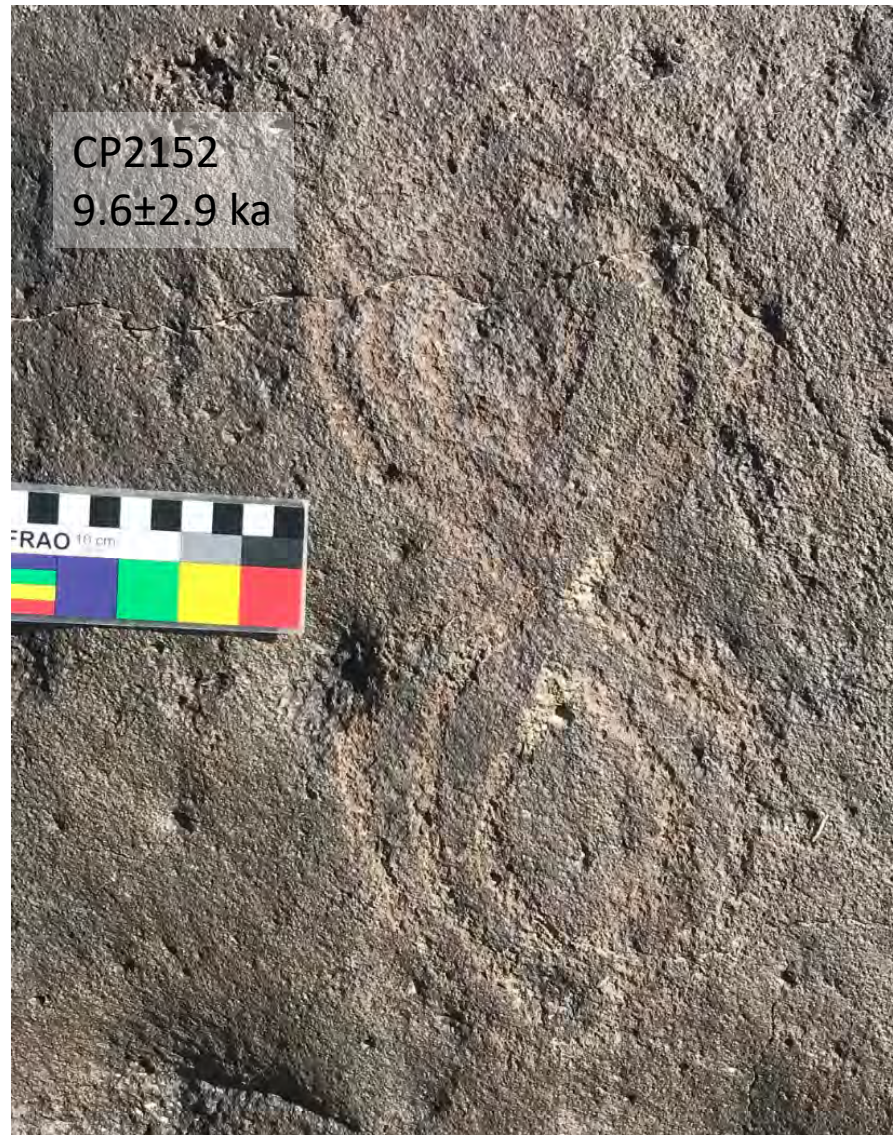



CP 2160

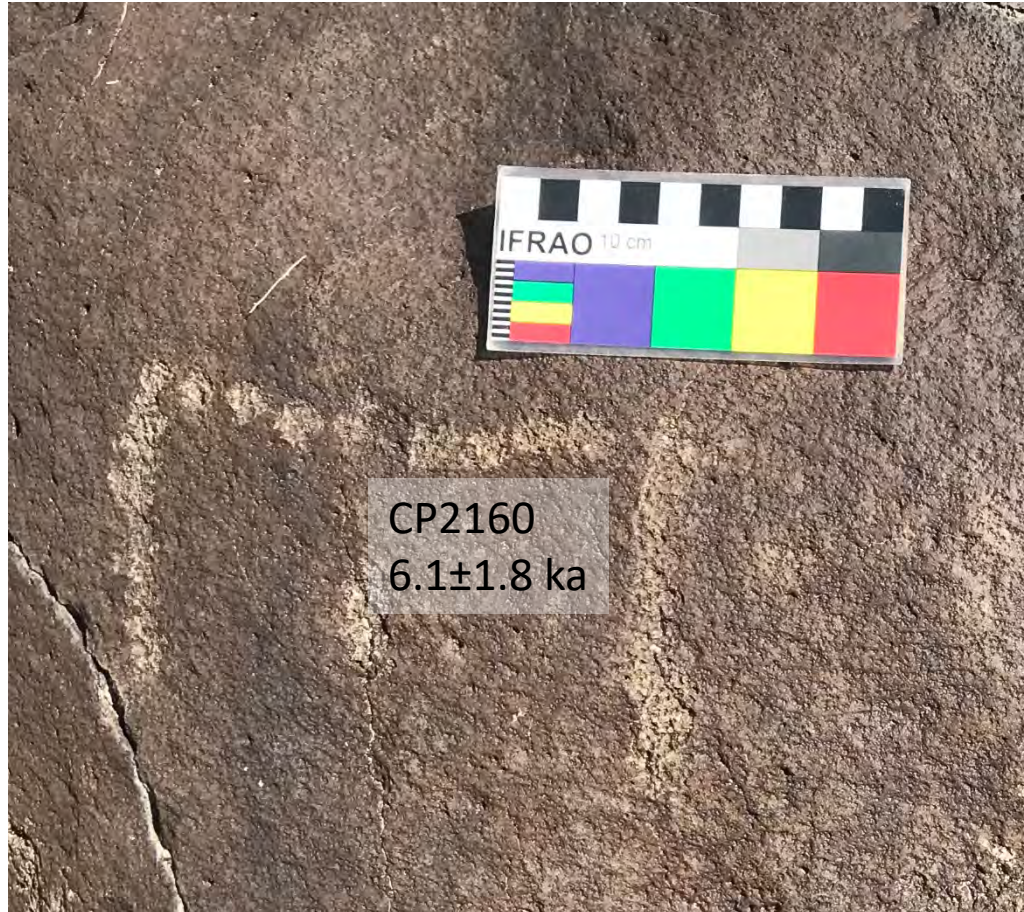

CP2160  
6.1±1.8 ka

CP 2166

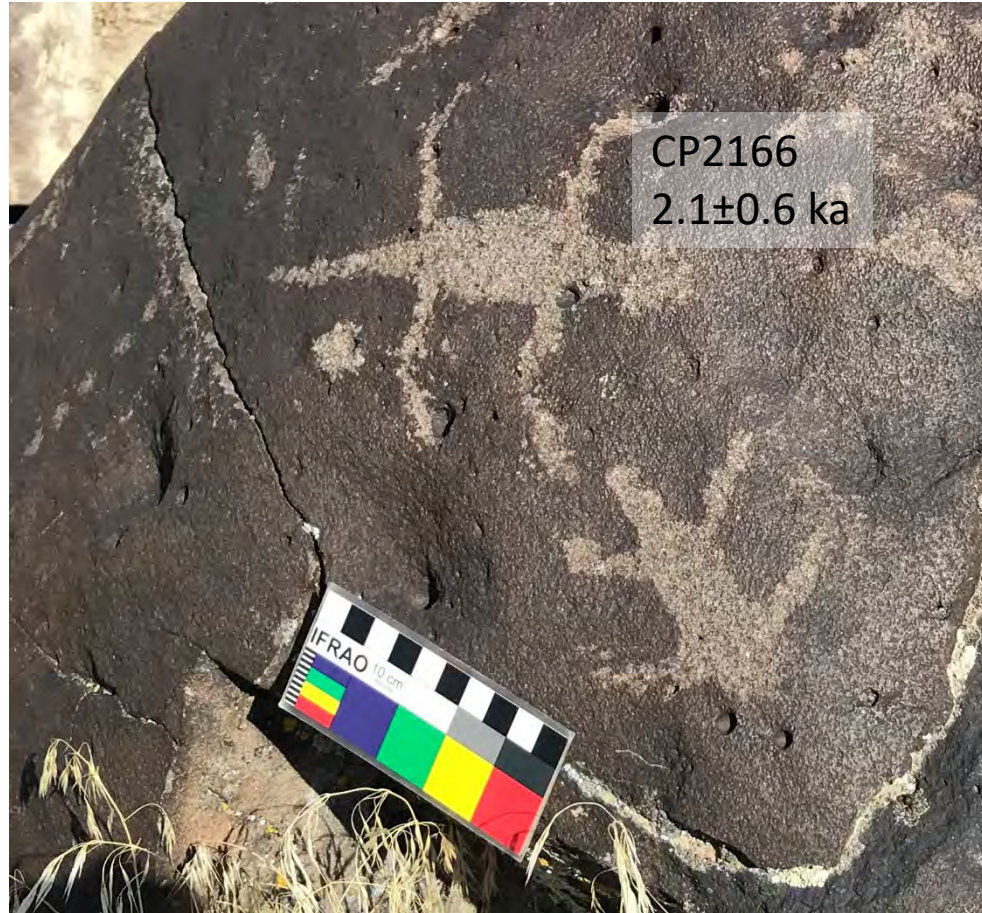

CP 2172

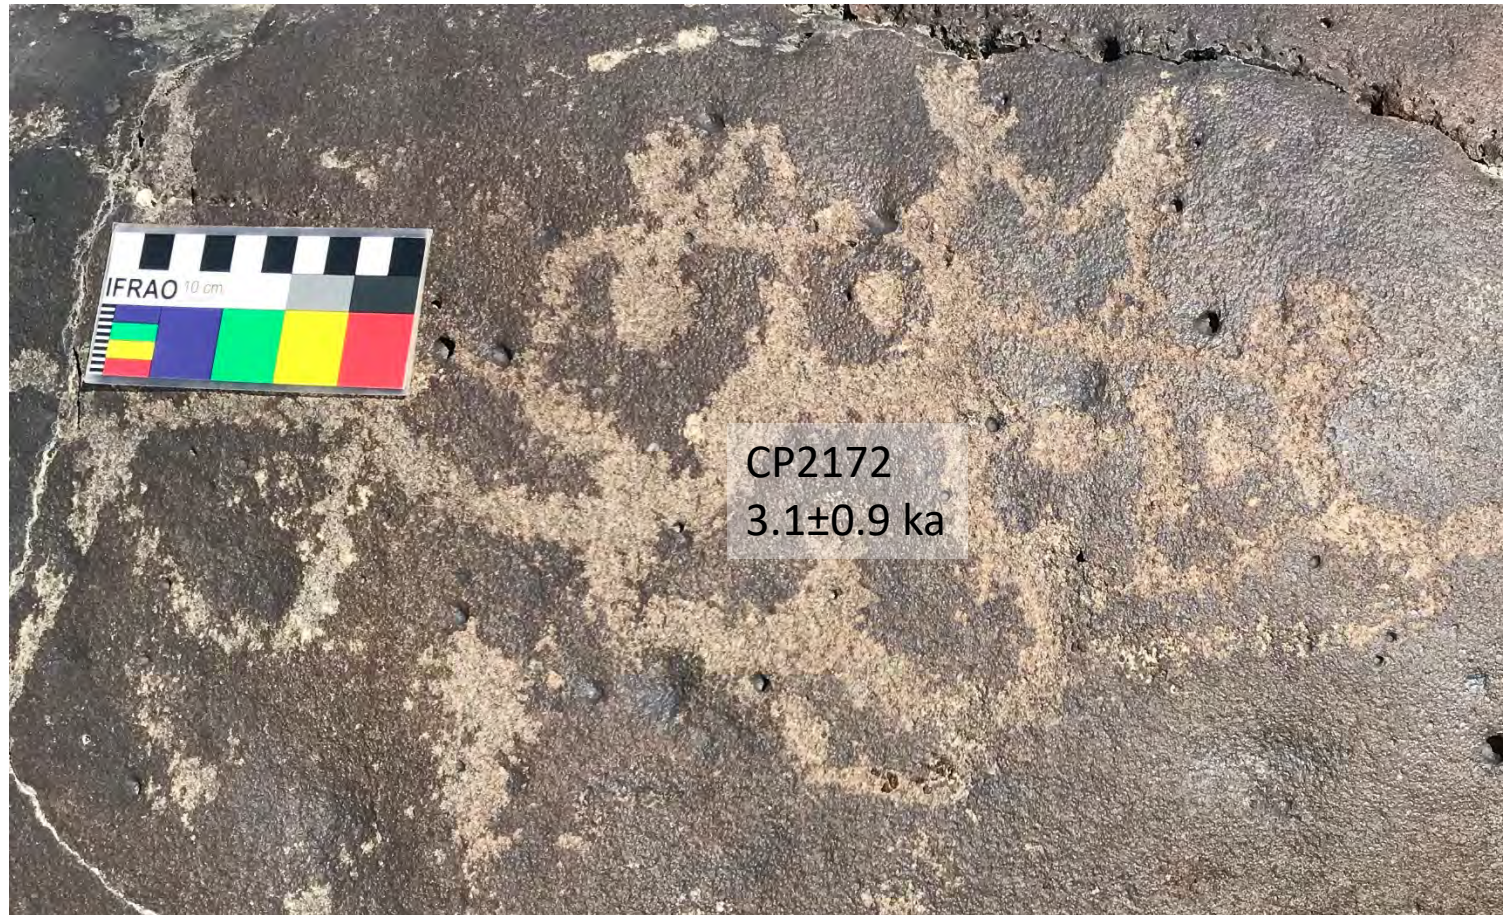

CP2172  
3.1±0.9 ka

CP 2179

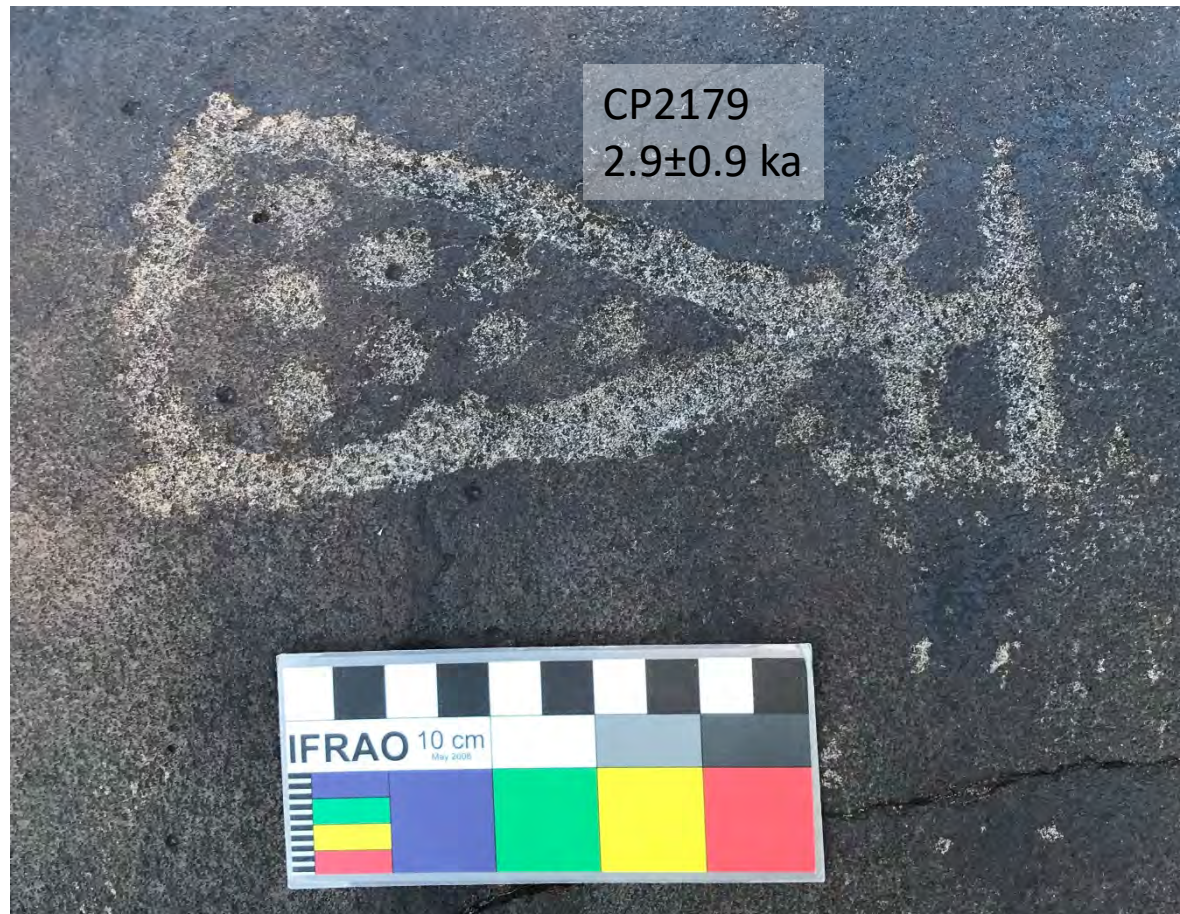

CP 2185

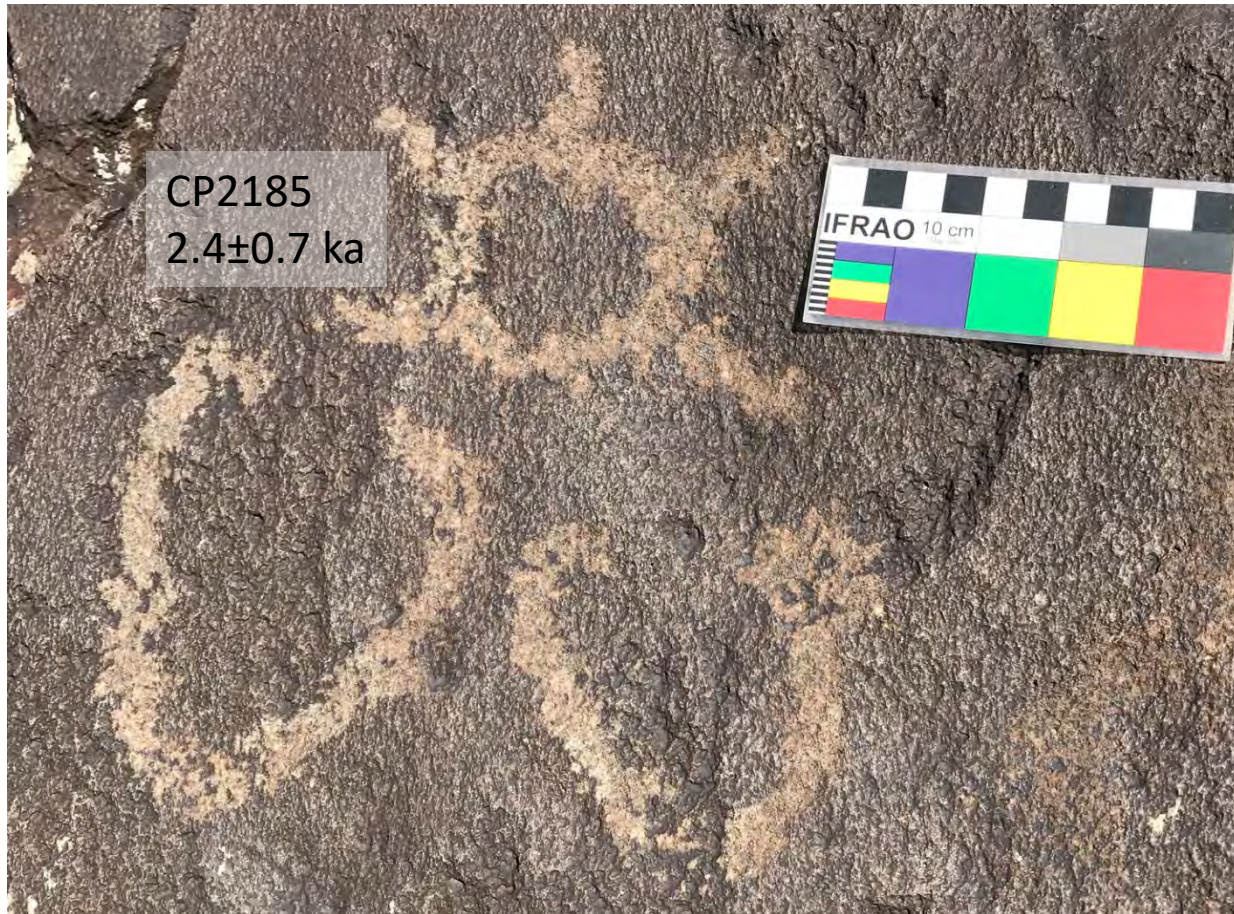

CP 2191

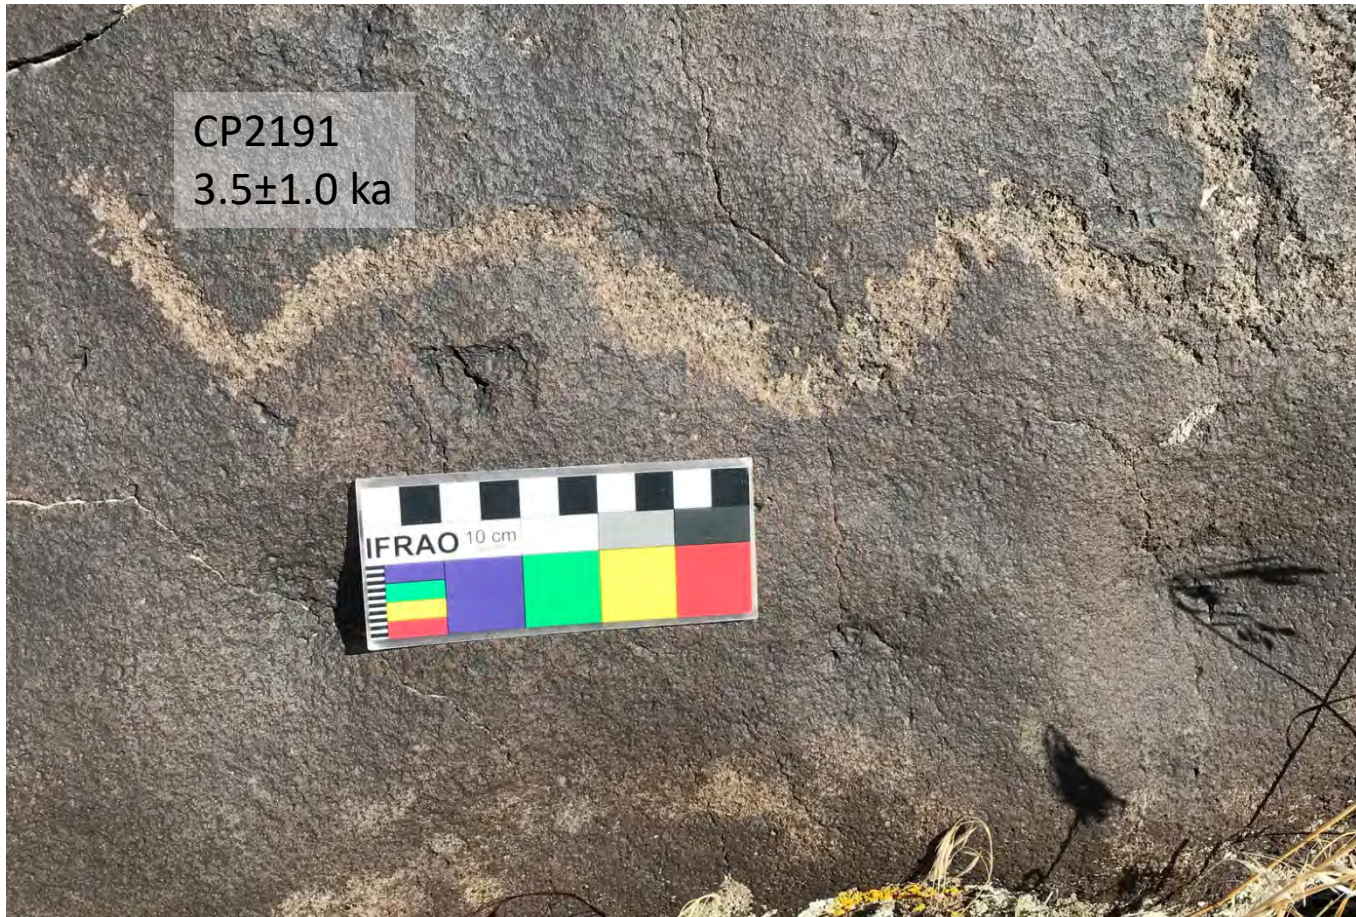

# CP 2198 & 2201

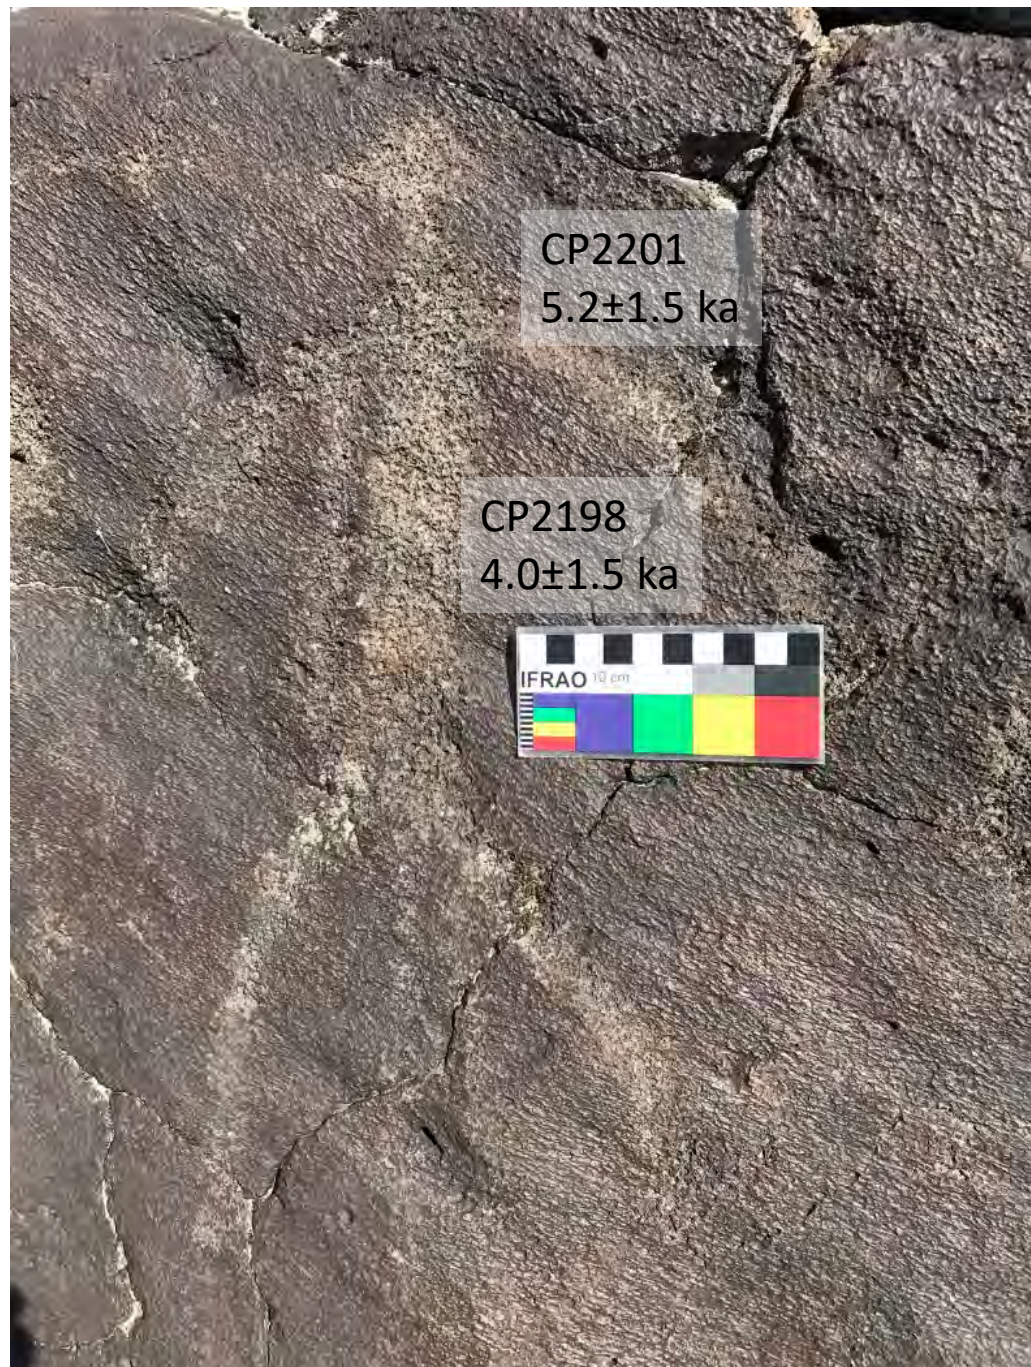

CP 2208

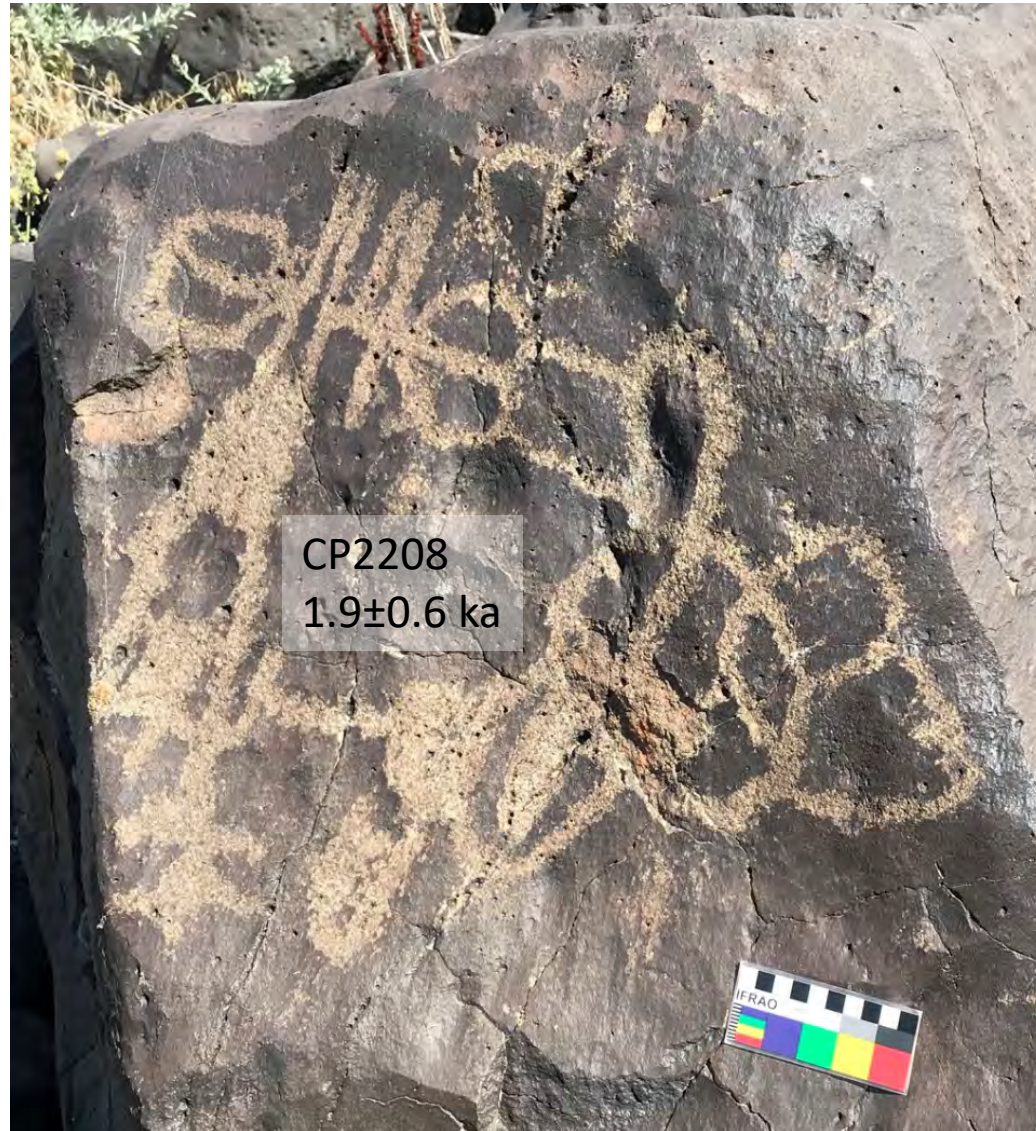



CP 2215

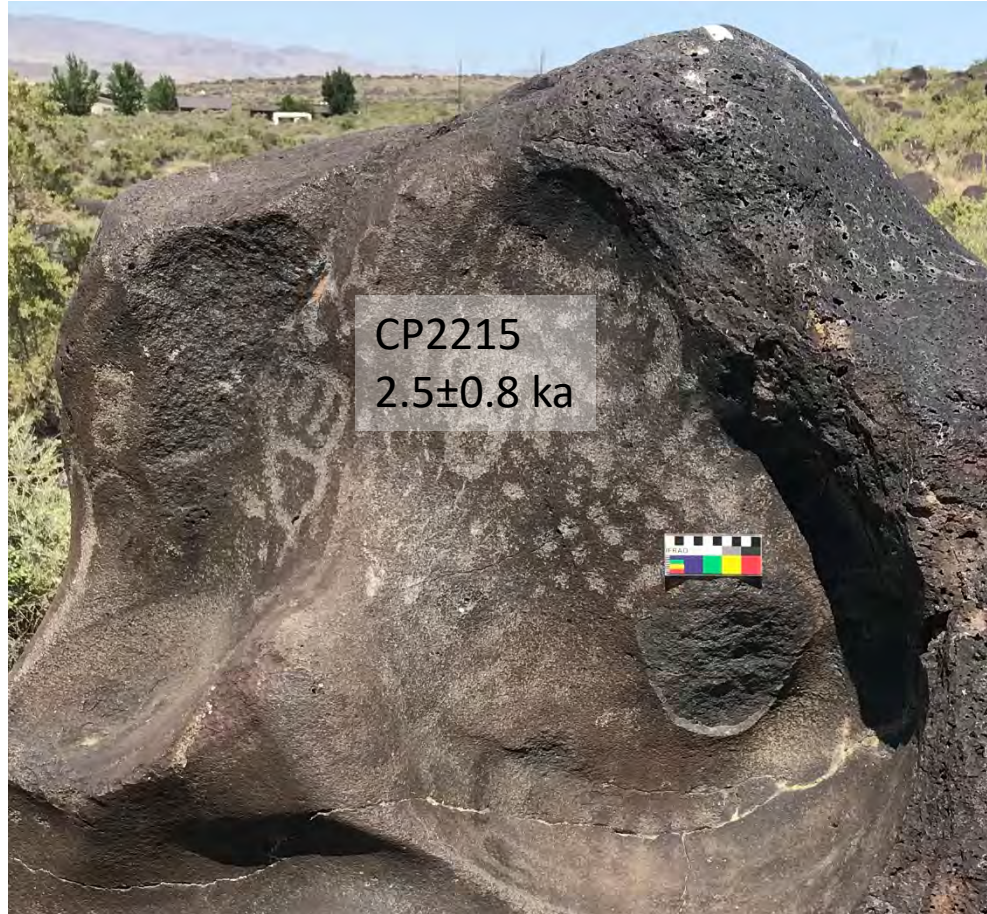

CP 2235

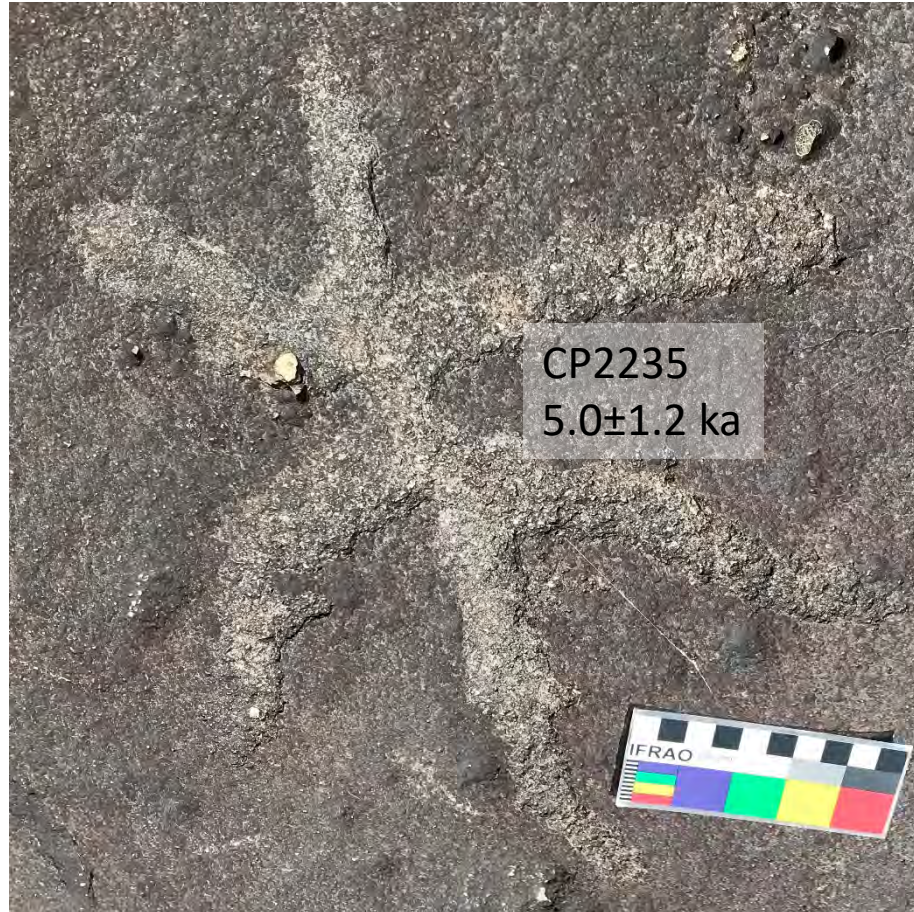

Supplement: pone.0263189.s002.pdf [file pone.0263189.s002.pdf]
