# Supplementary material for: Archaeometric studies on rock art at four sites in the northeastern Great Basin of North America
Source: PubMed Central journal article supplement (PMC8791535; doi:10.1371/journal.pone.0263189), 2022-01-26

LR 2307

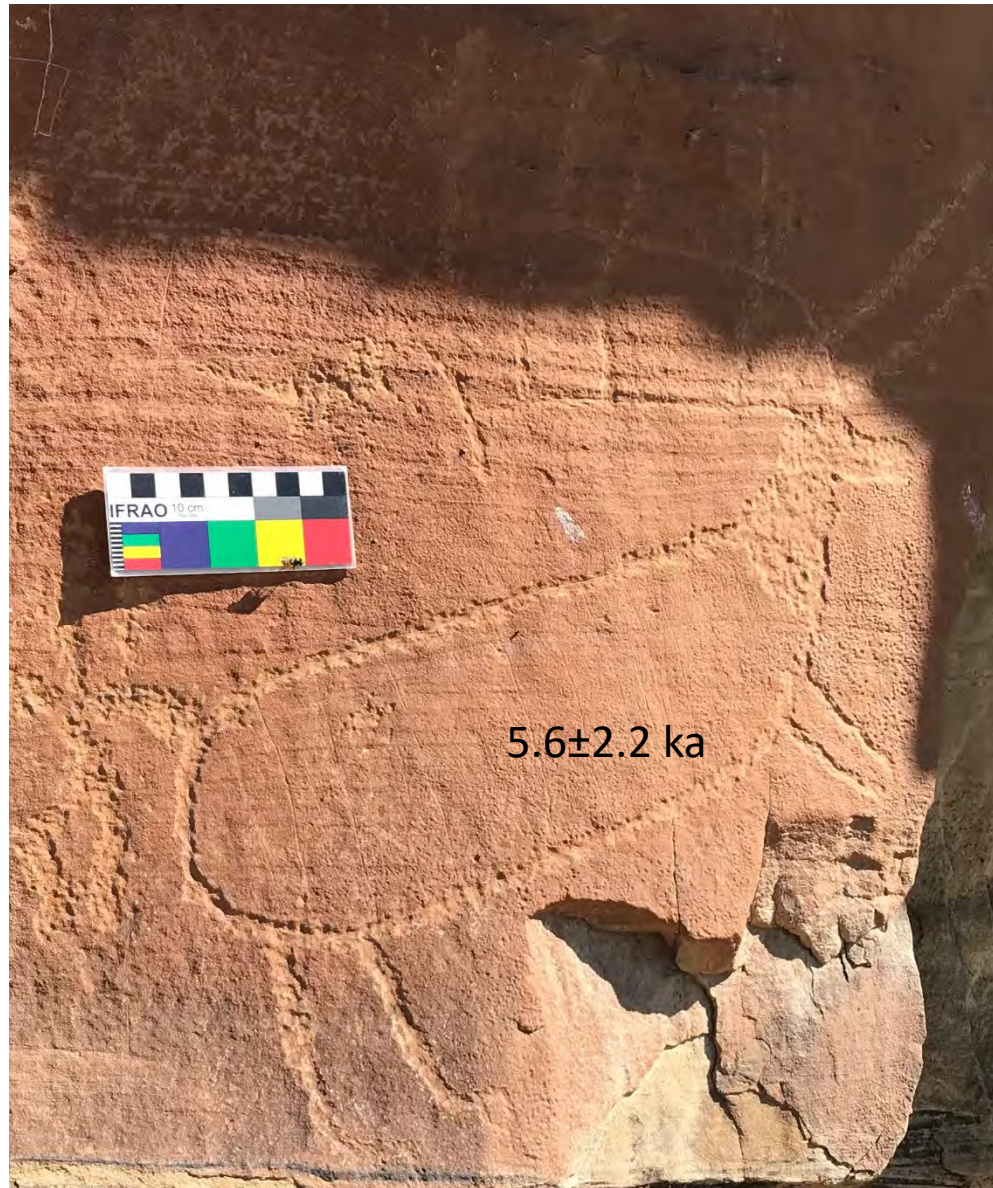

5.6±2.2 ka

LR2315

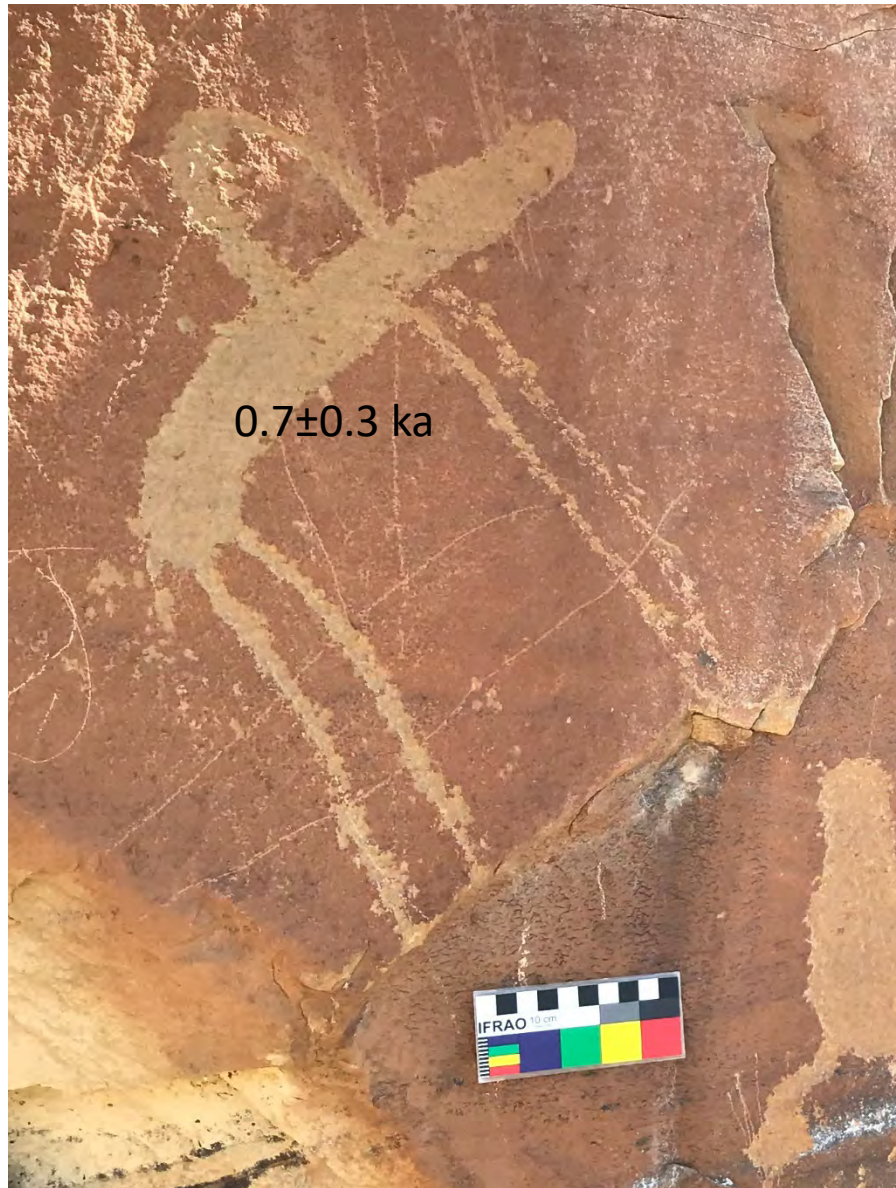

LR2327

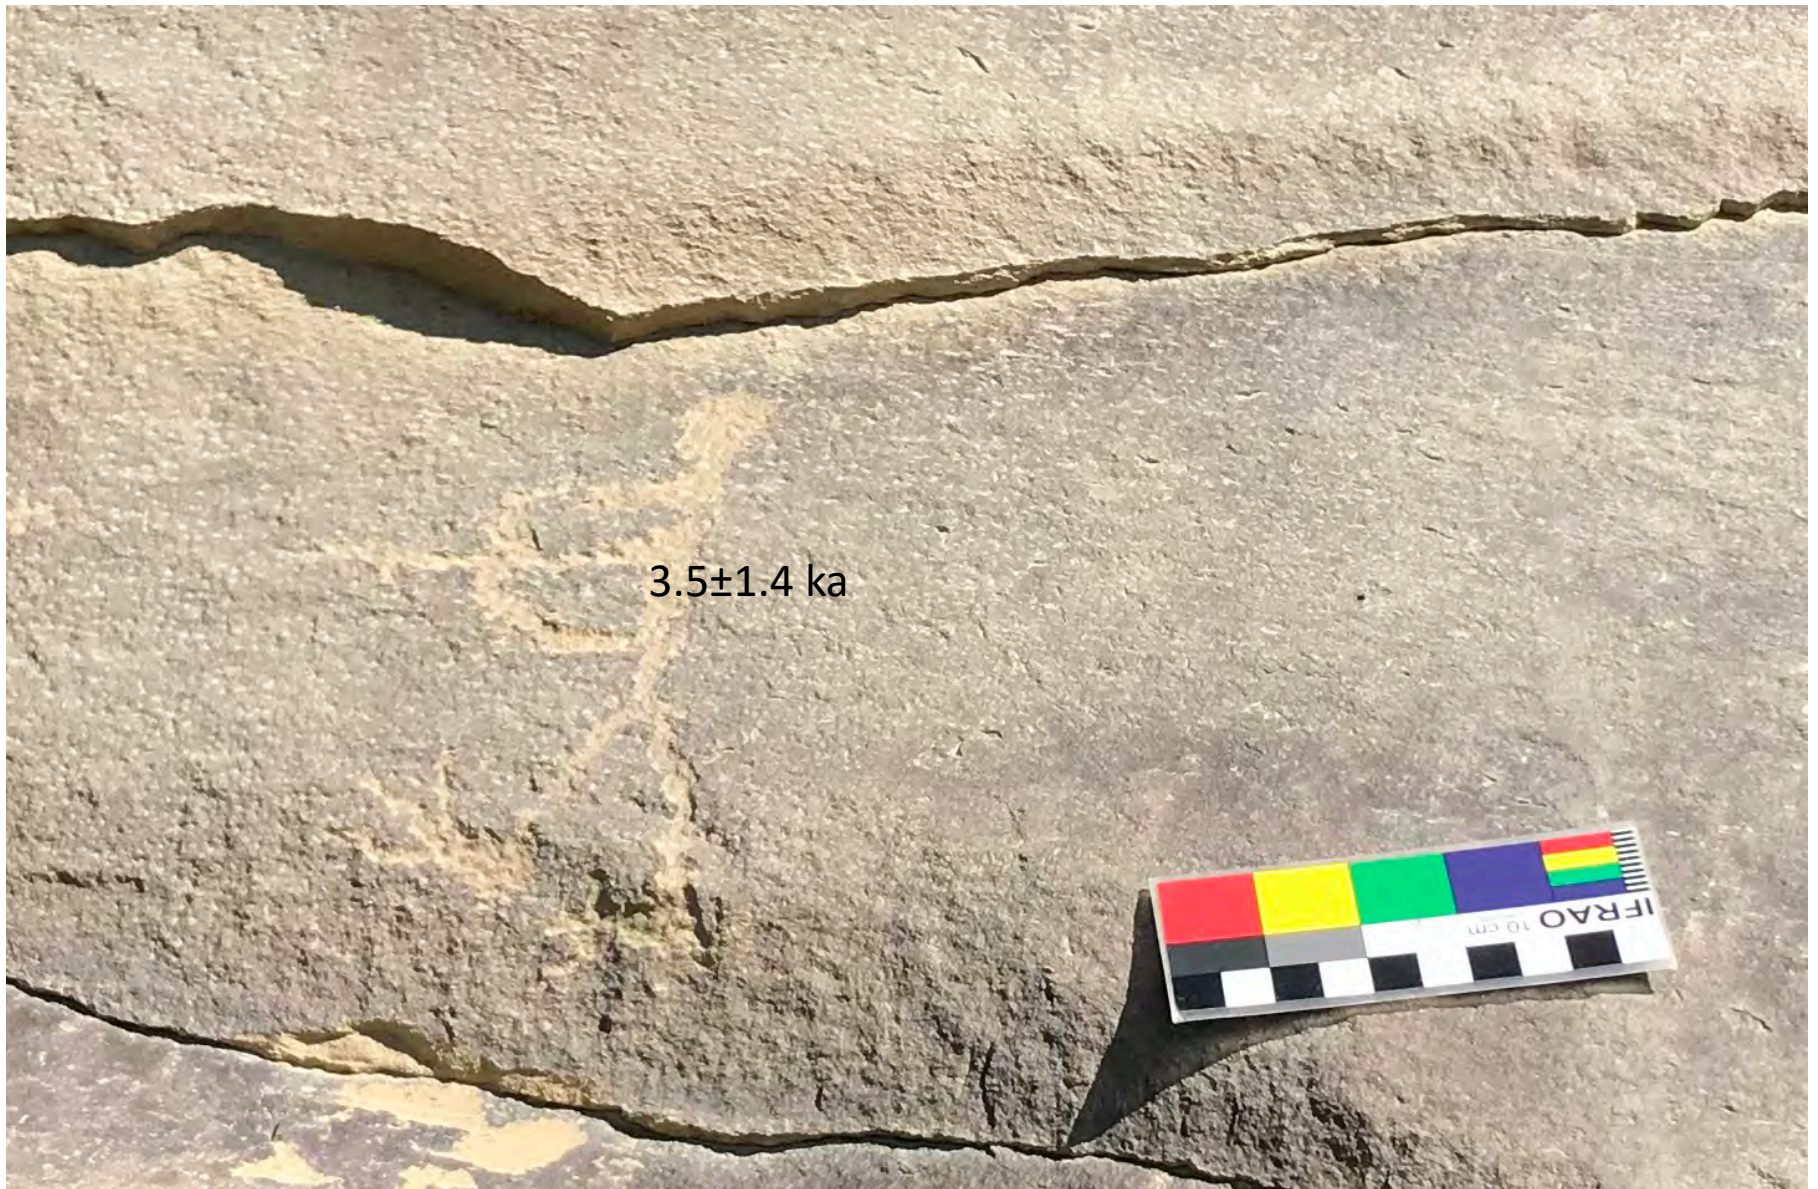

3.5±1.4 ka

LR2335

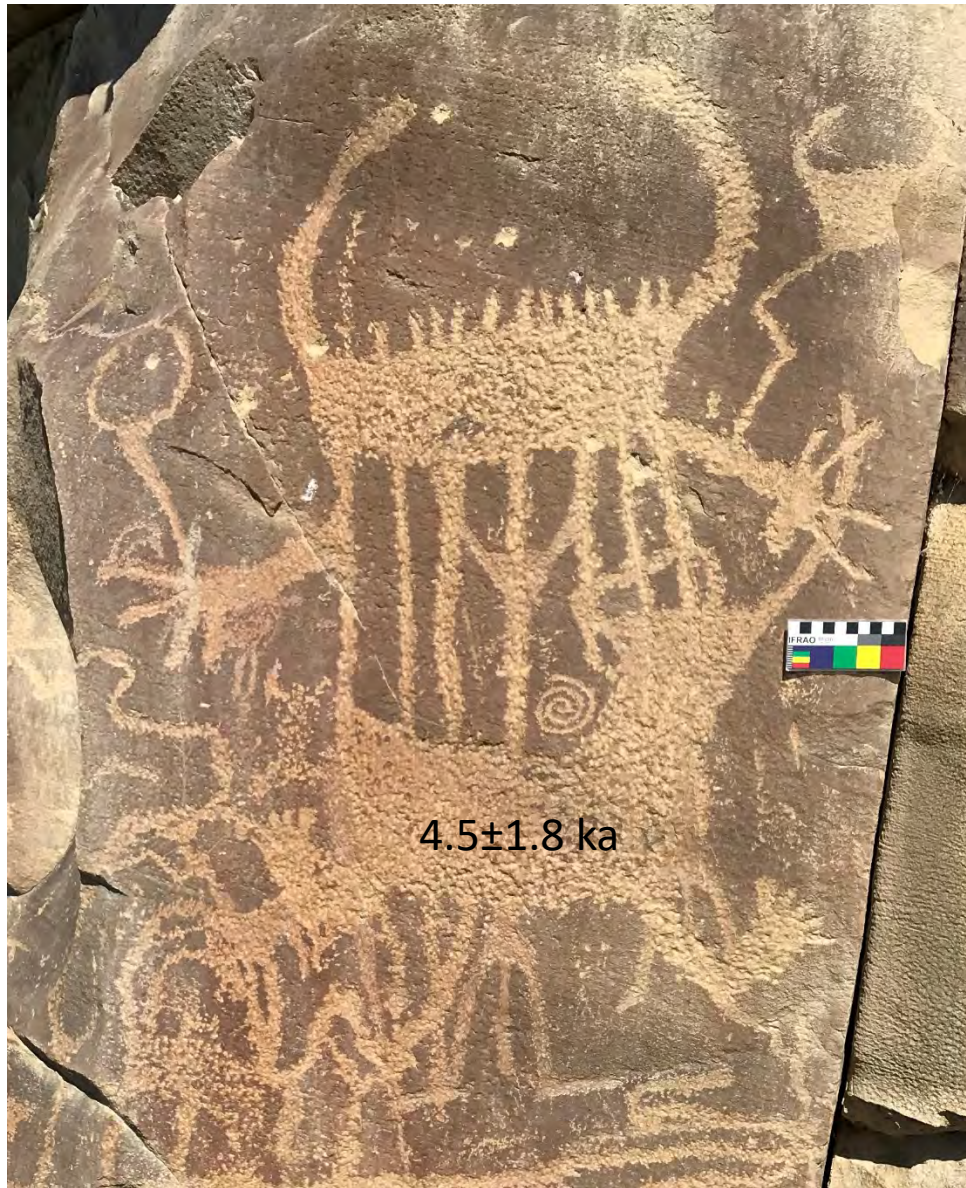

$4.5 \pm 1.8$  ka

# Panel 48

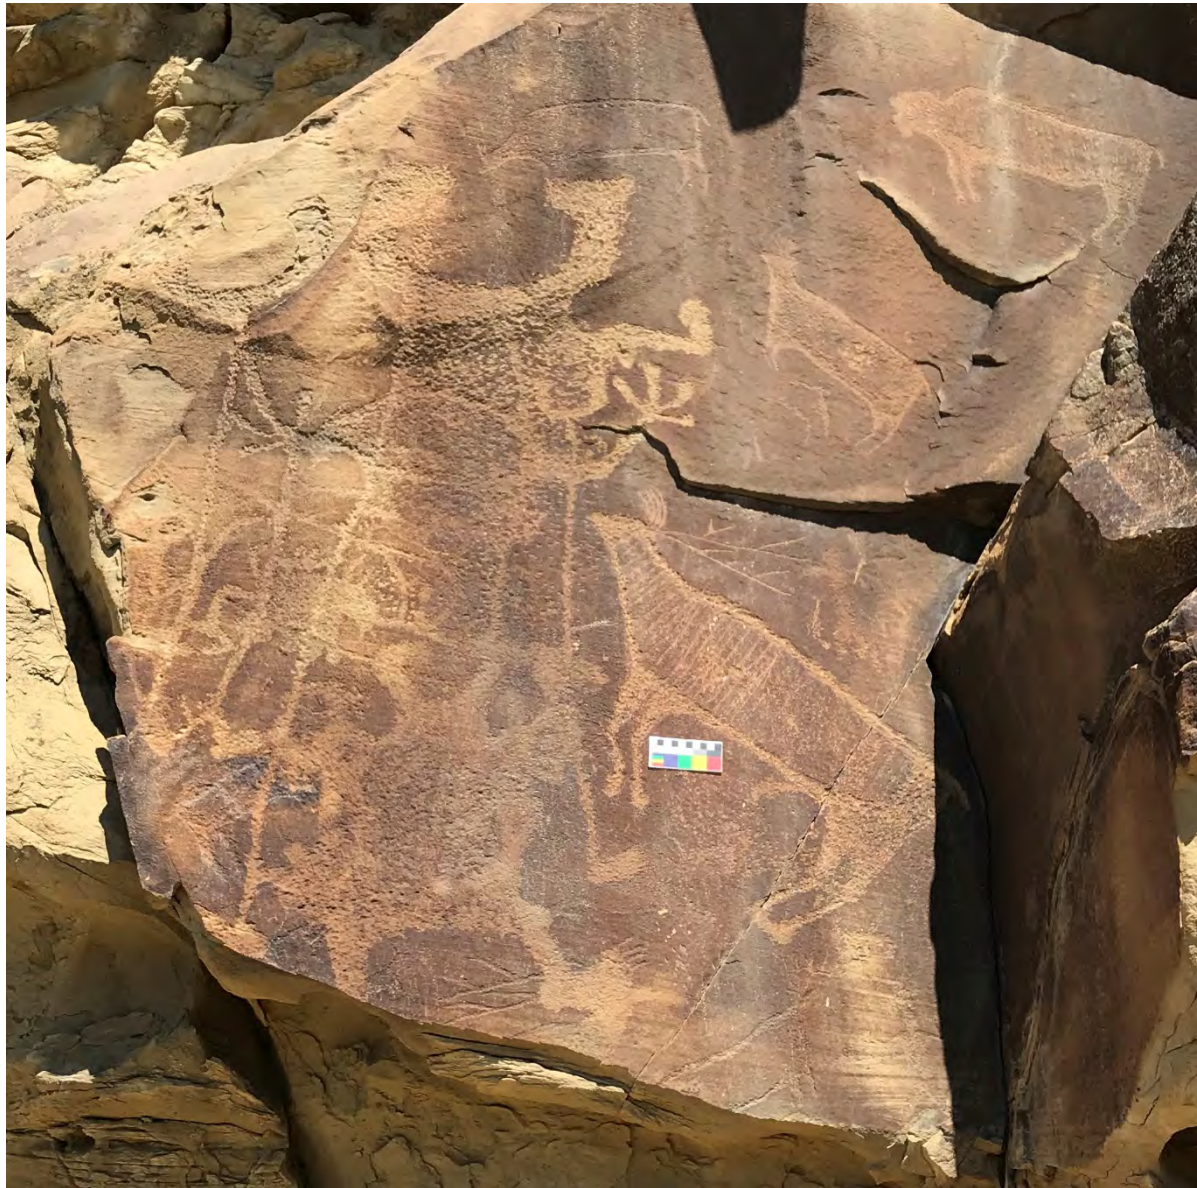

LR2345

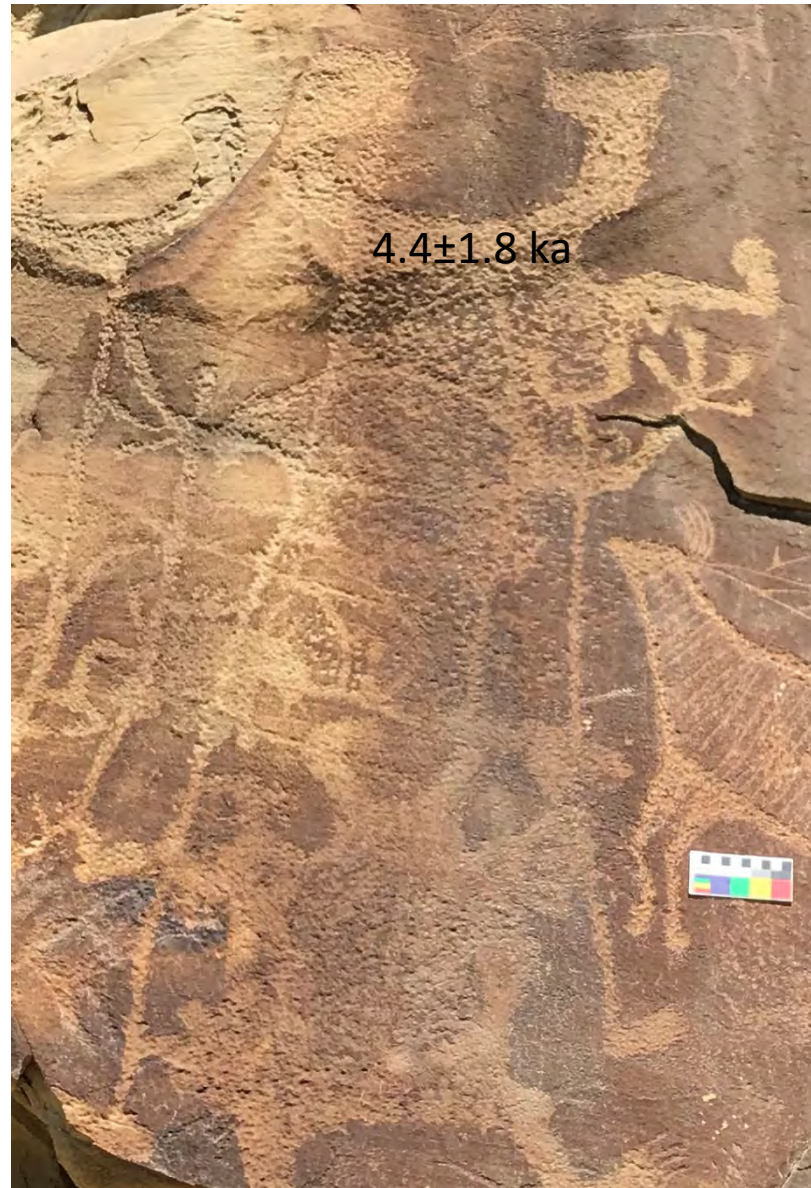

LR2351/63/76

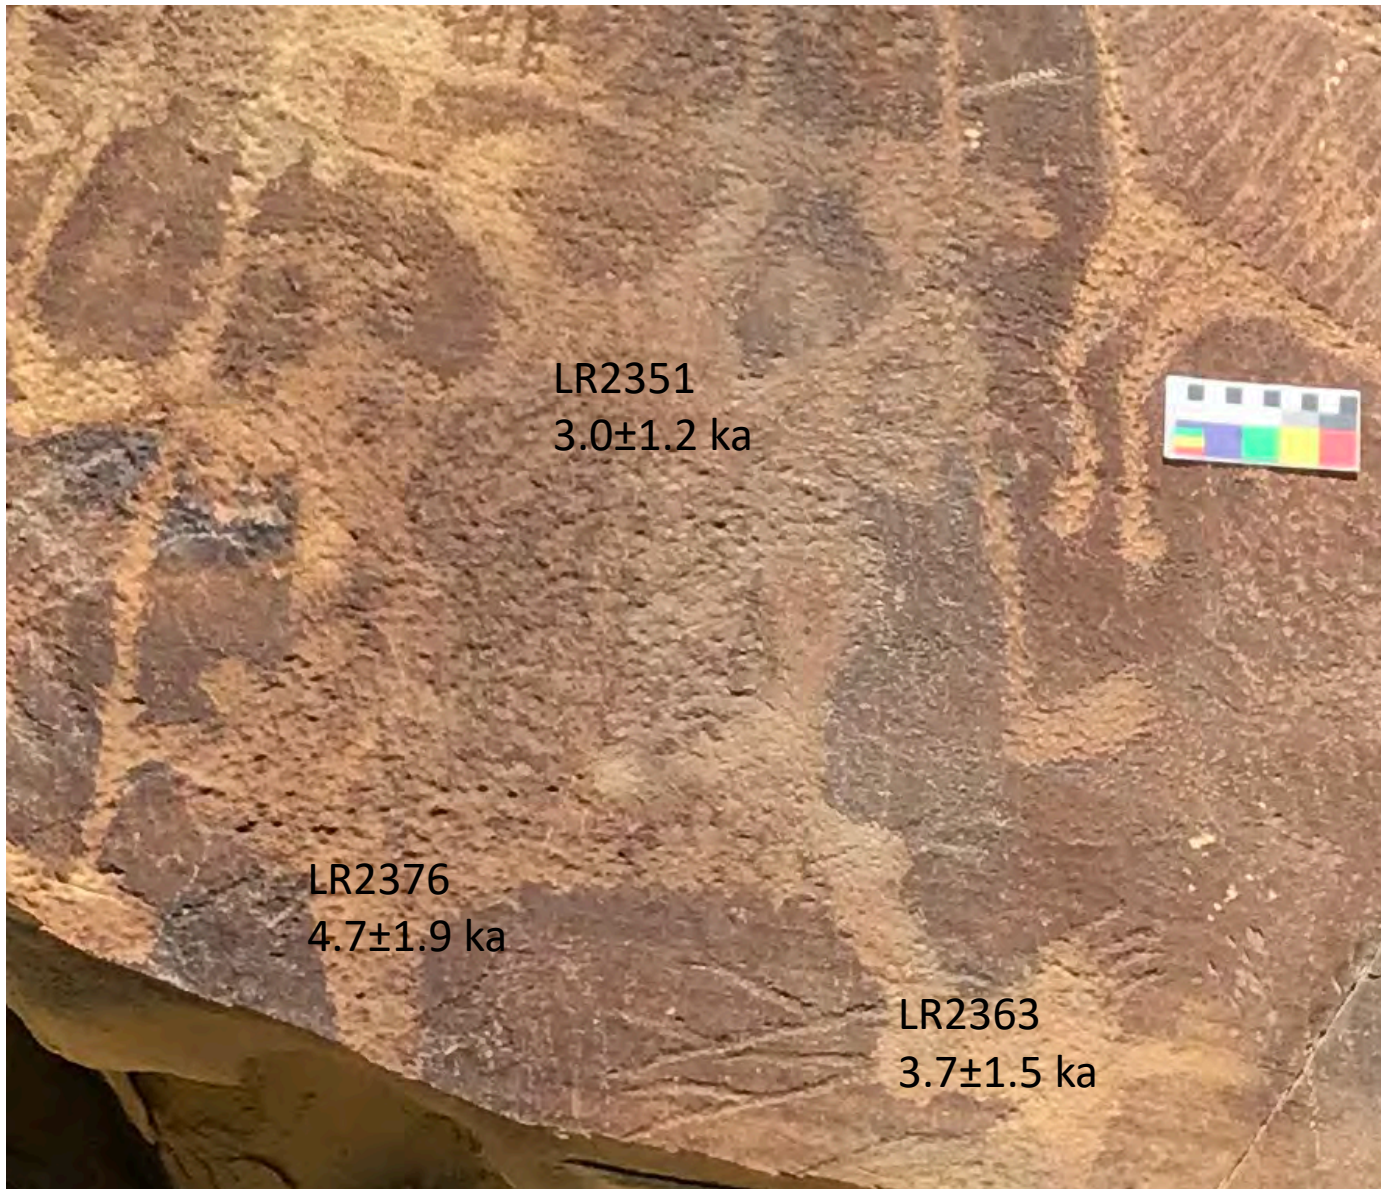

LR2351  
3.0±1.2 ka

LR2376  
4.7±1.9 ka

LR2363  
3.7±1.5 ka

LR2357

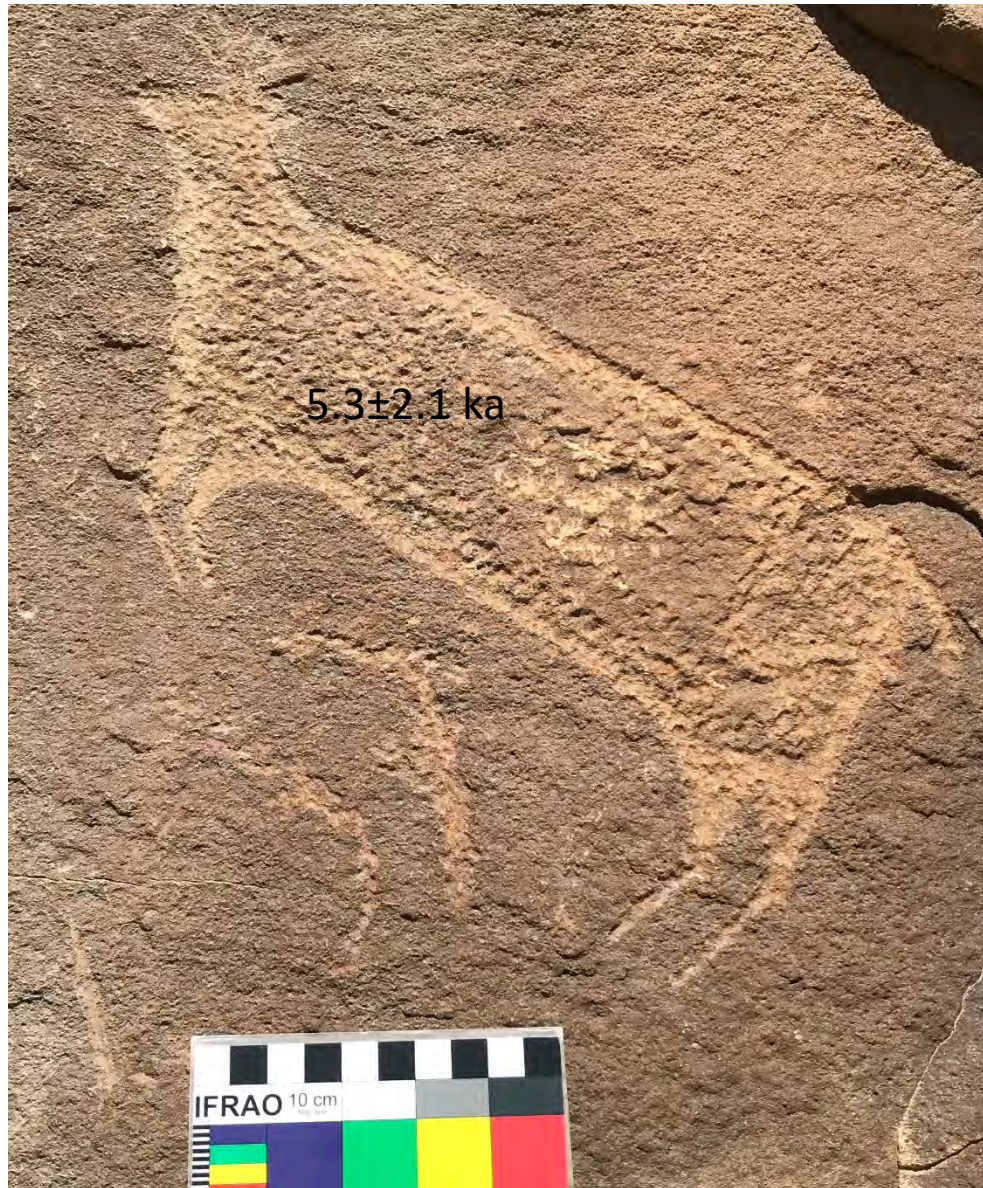



LR2369

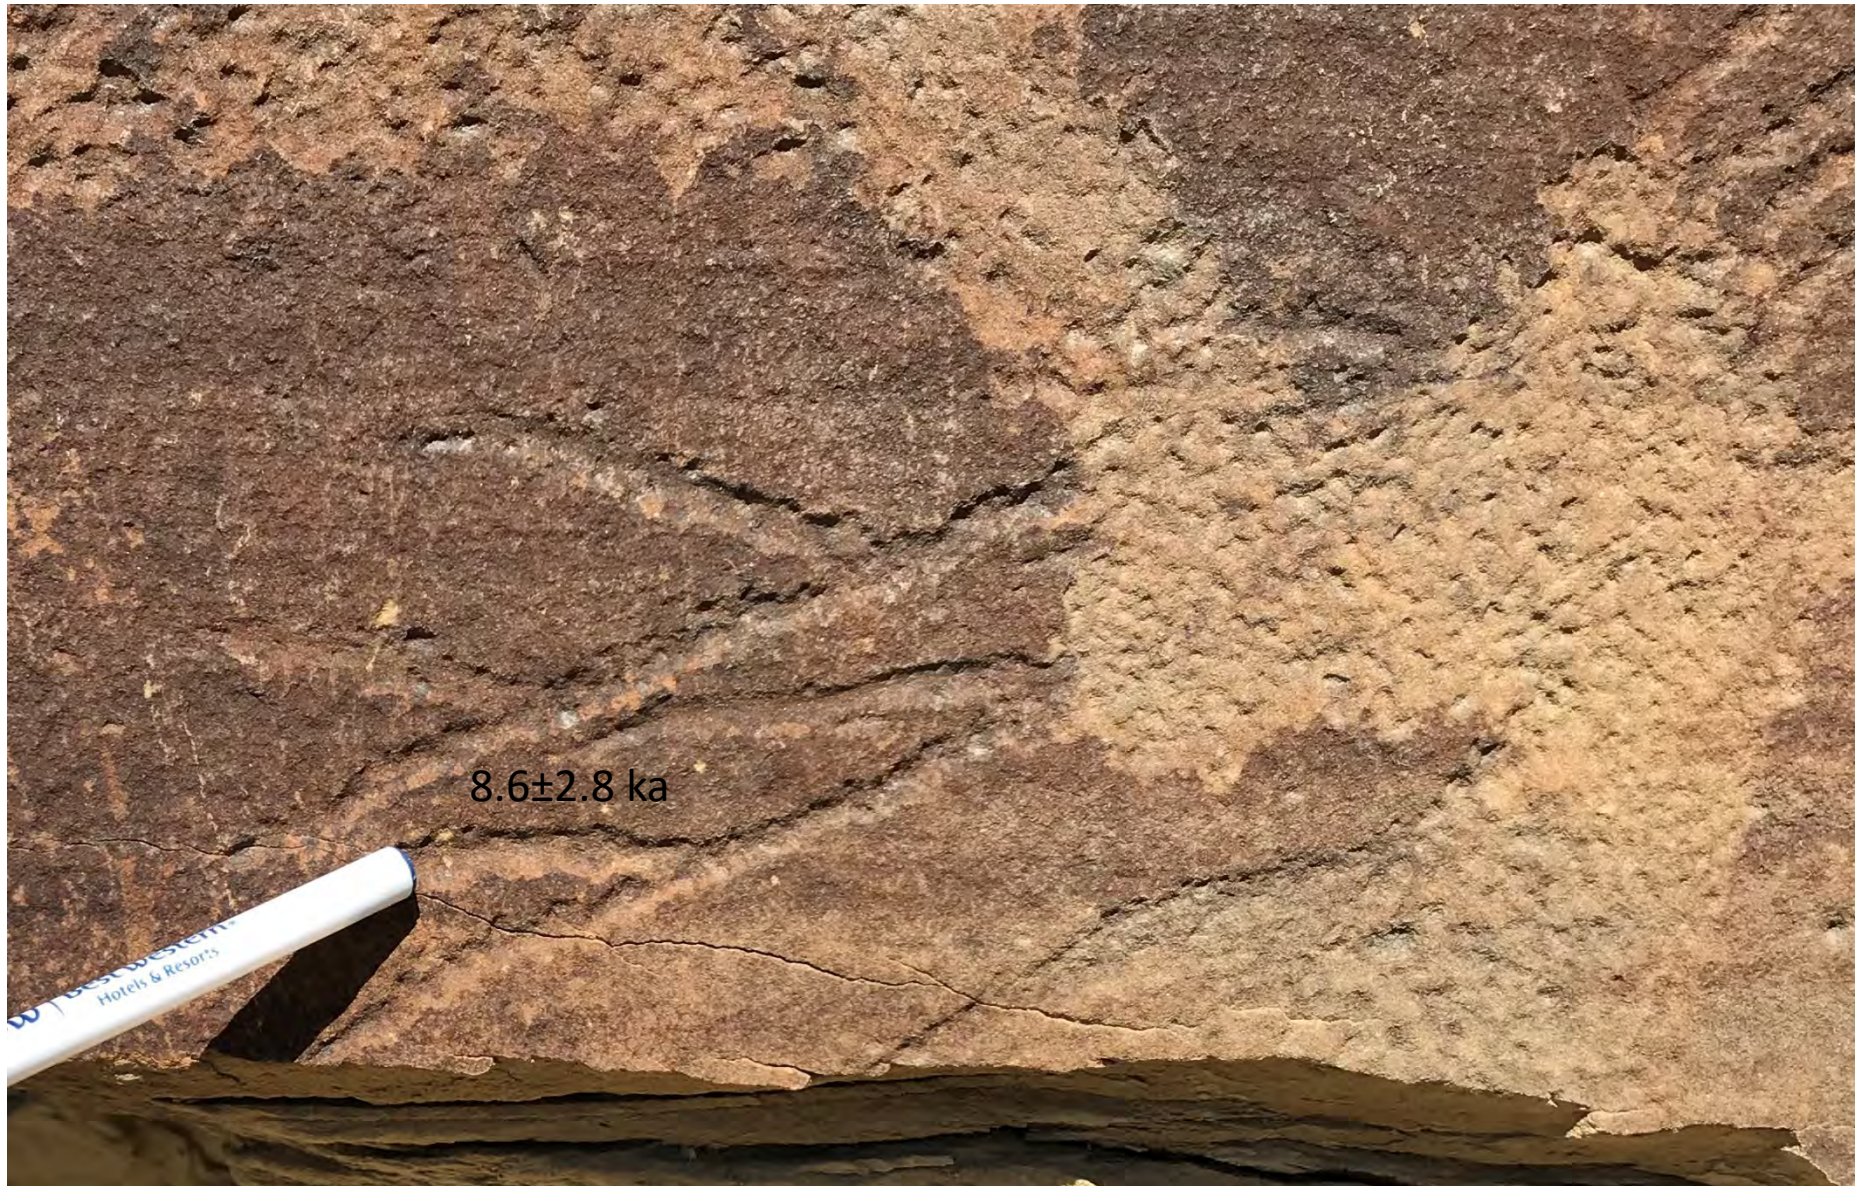

8.6±2.8 ka

LR2382

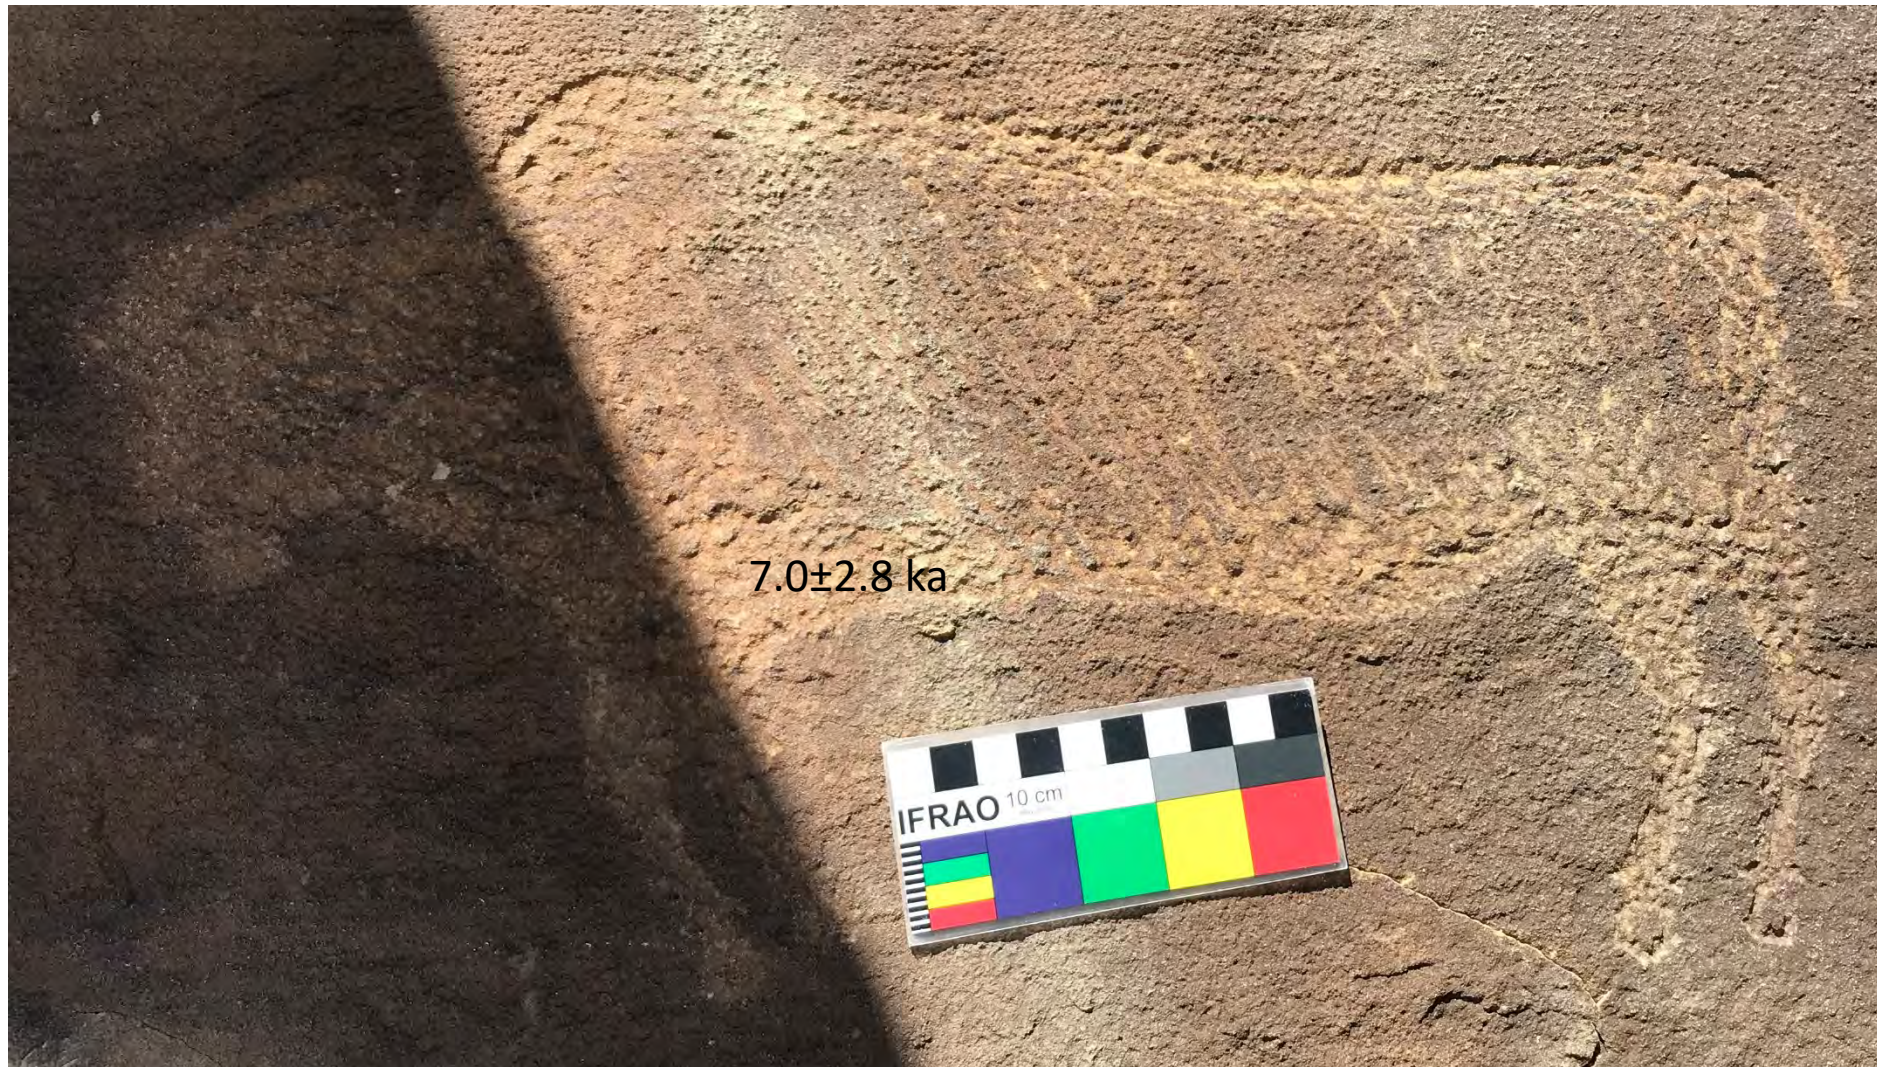

7.0±2.8 ka

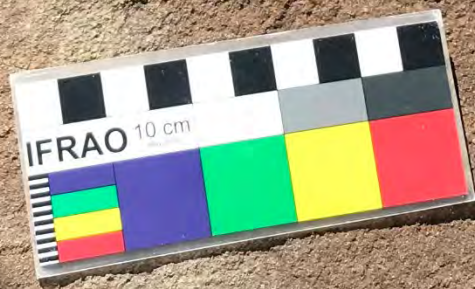

LR2390

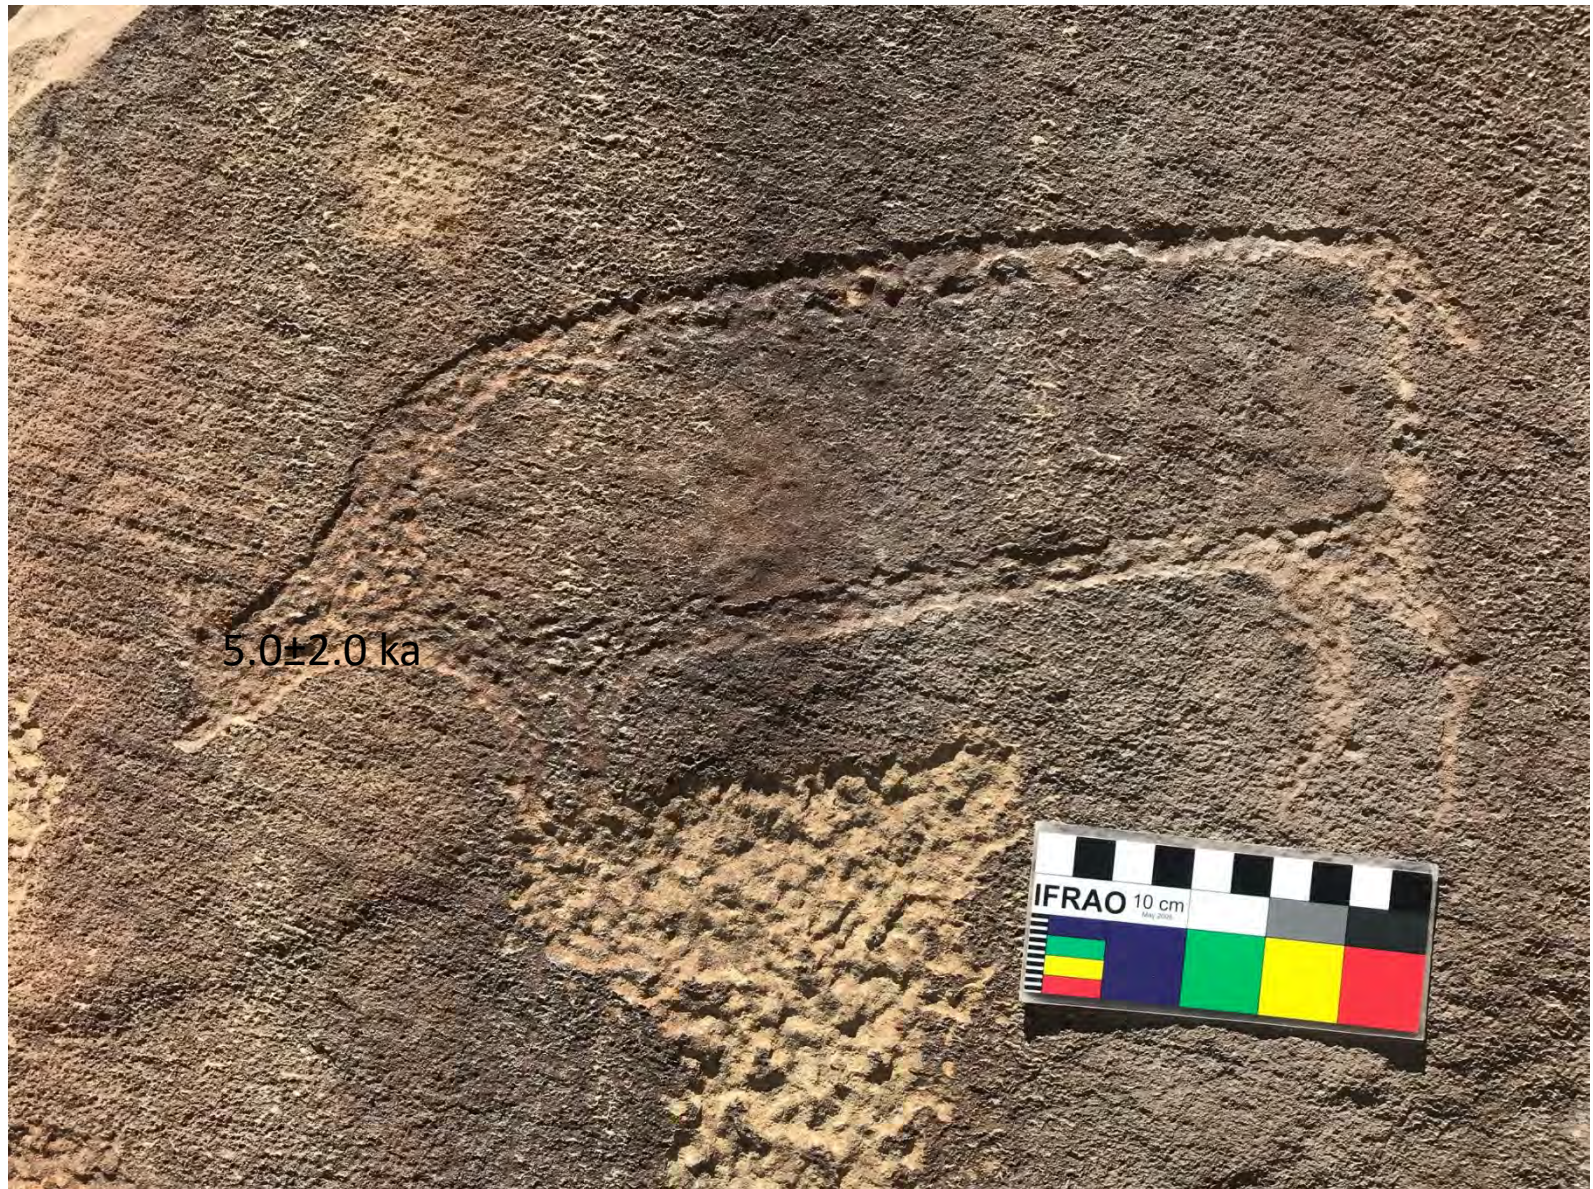

LR2400

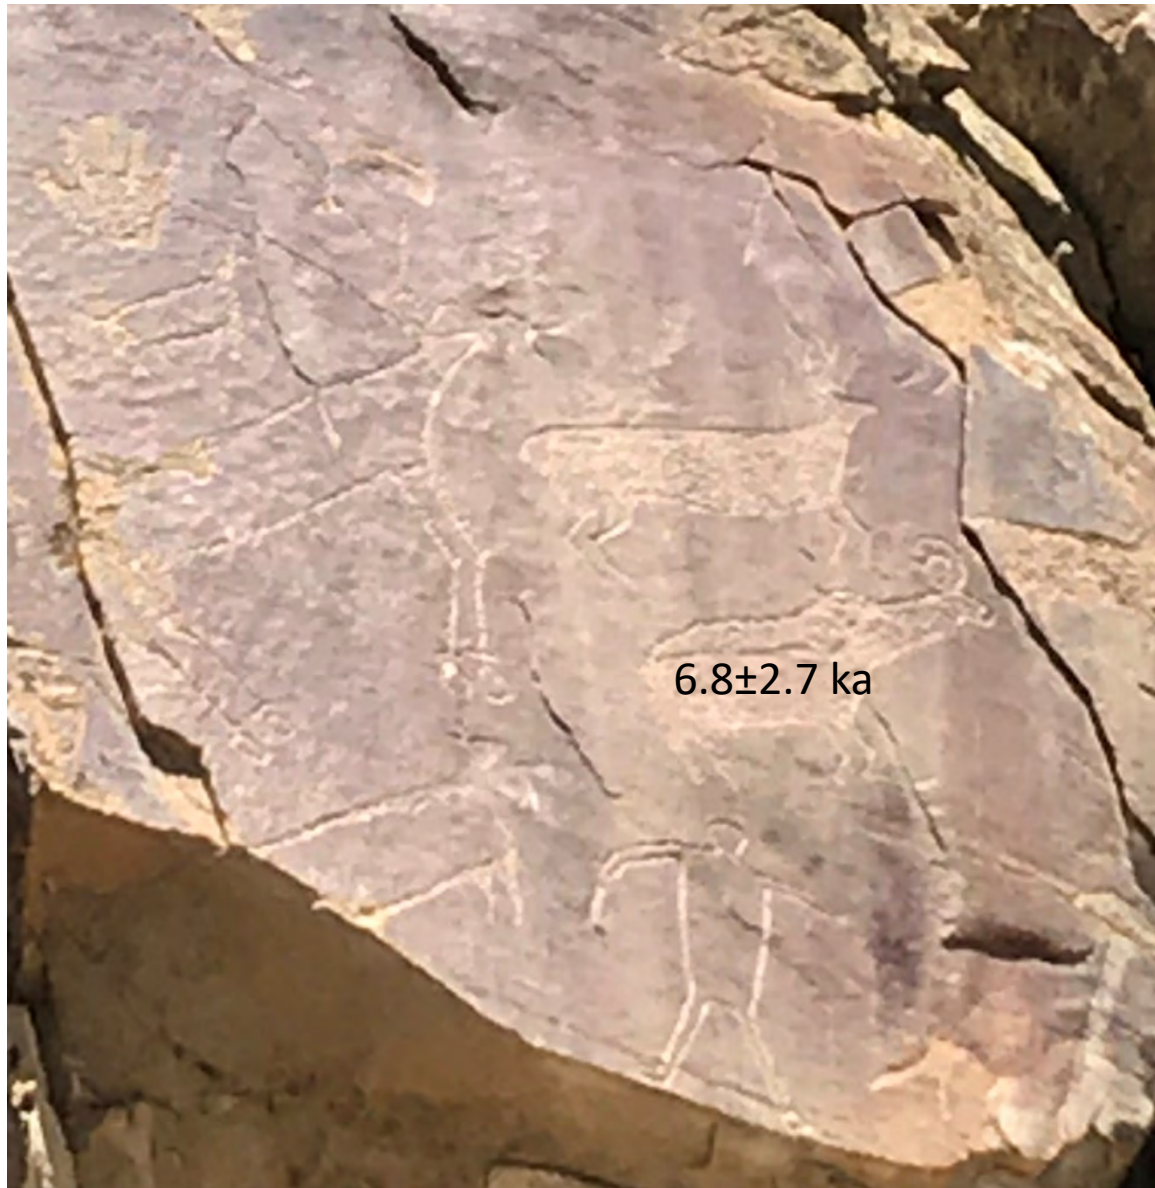

6.8±2.7 ka

LR2407

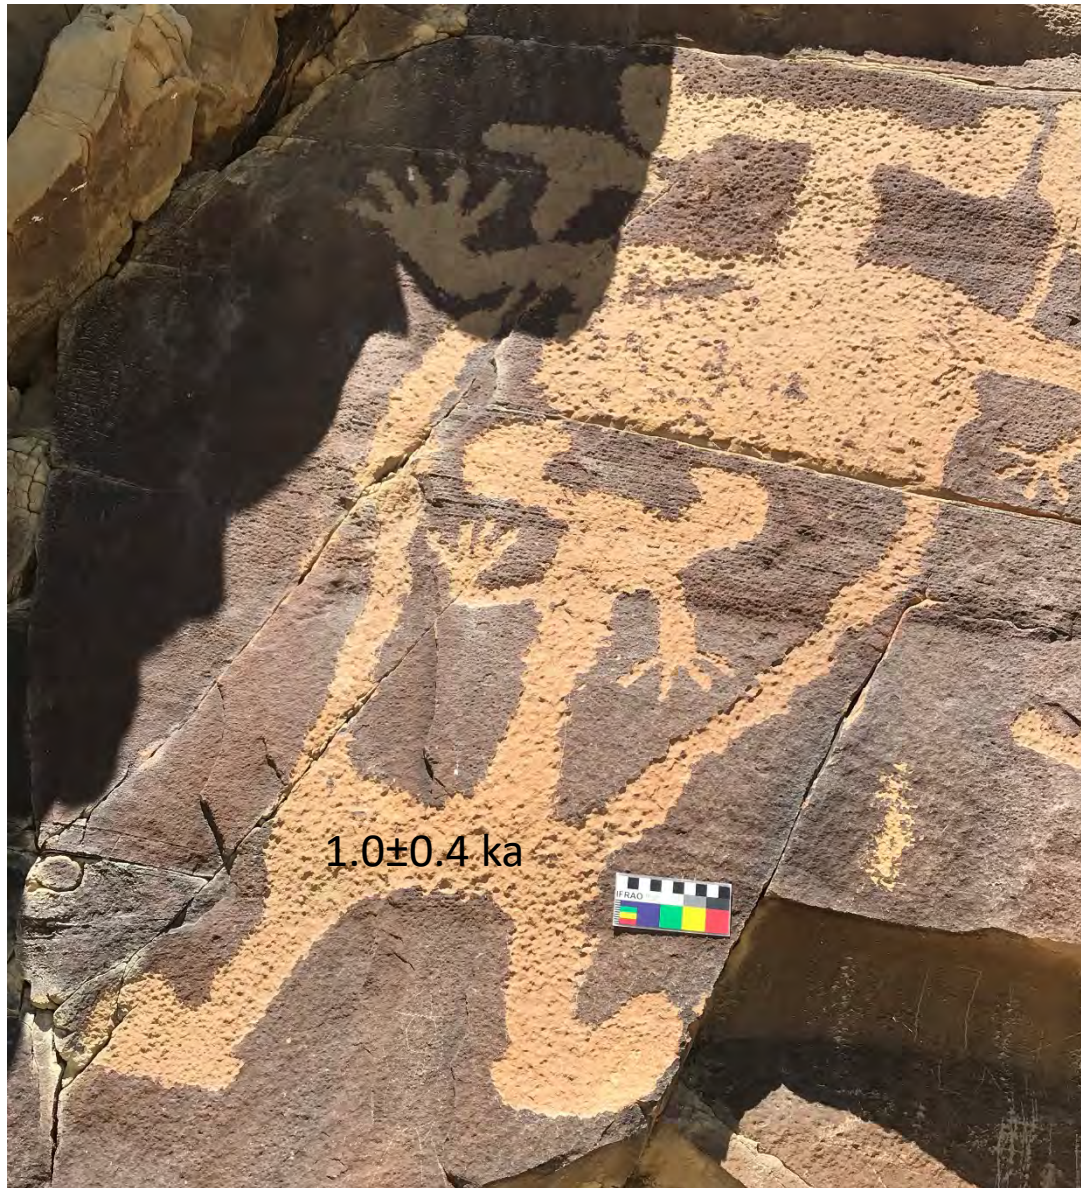

LR2411

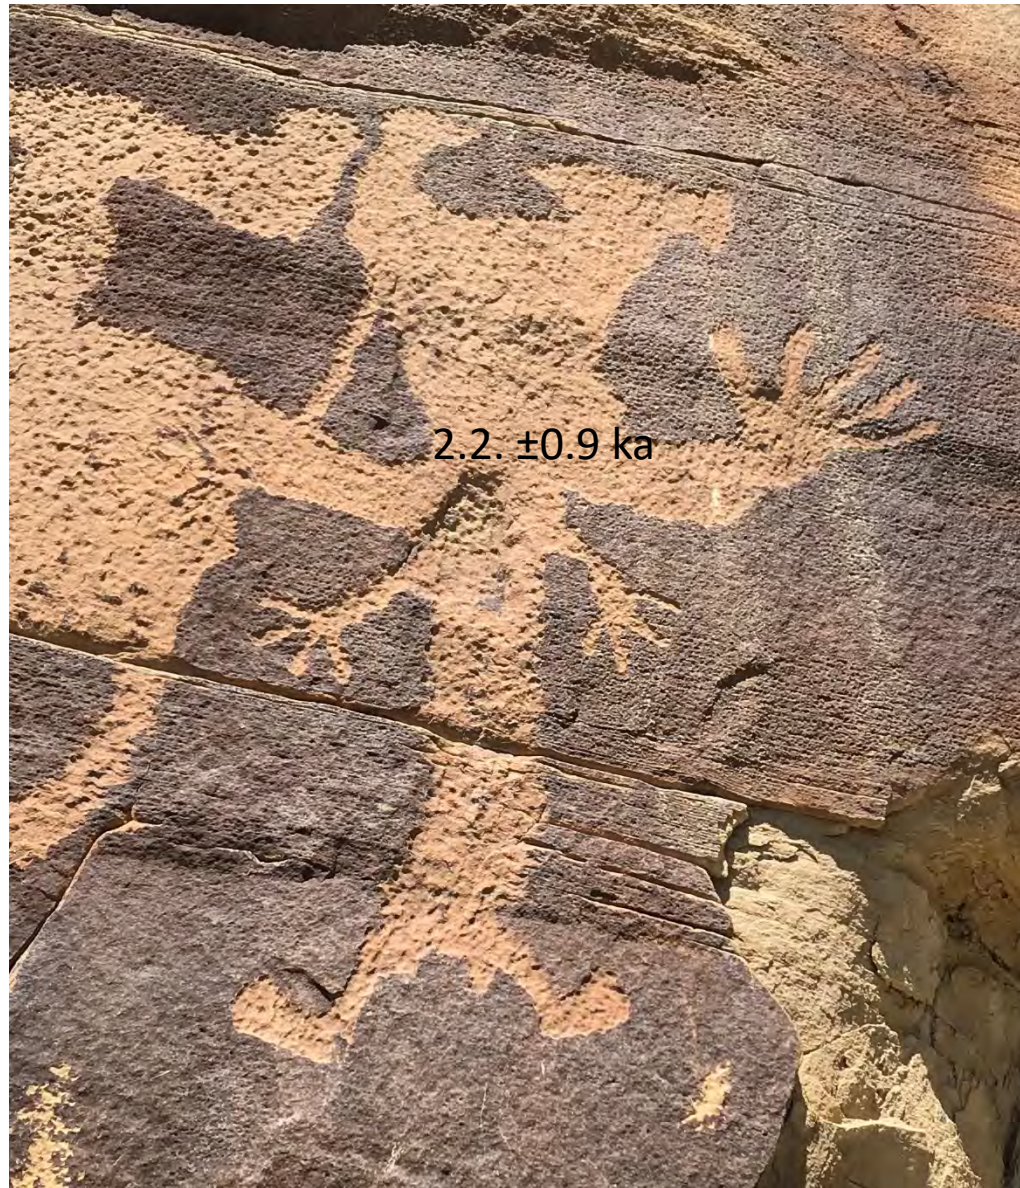

LR2417

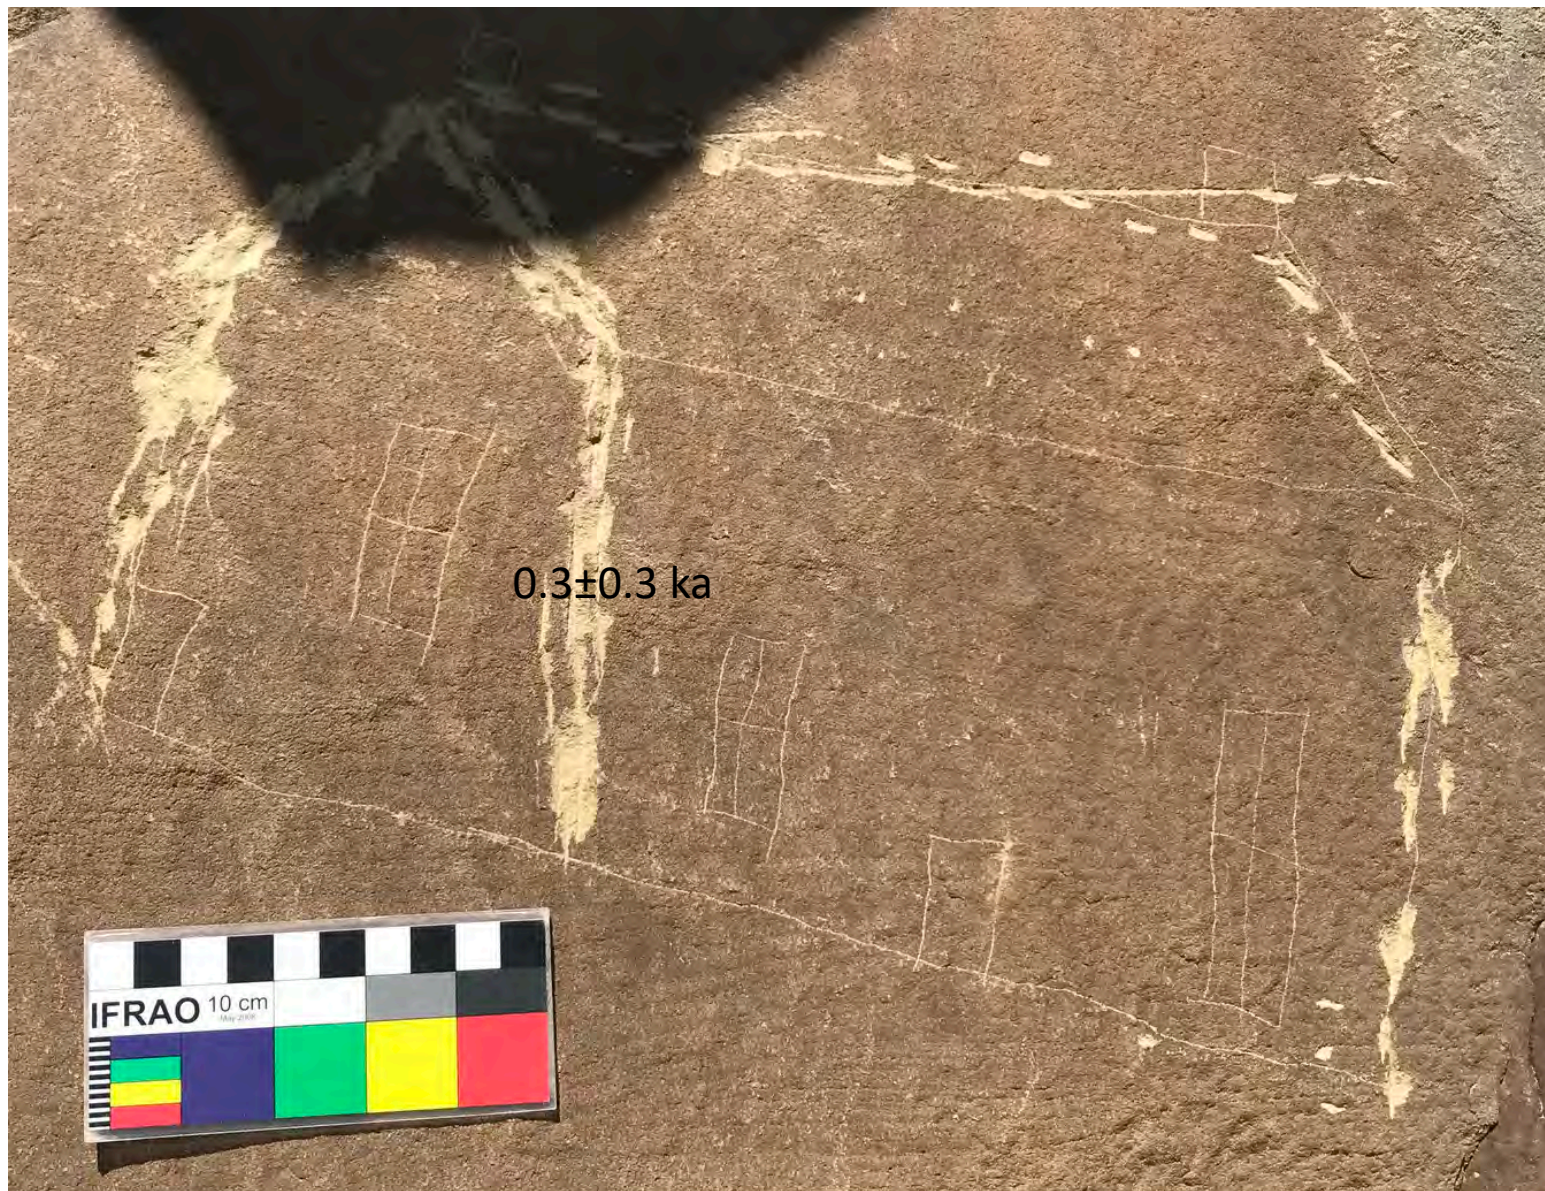

LR2419

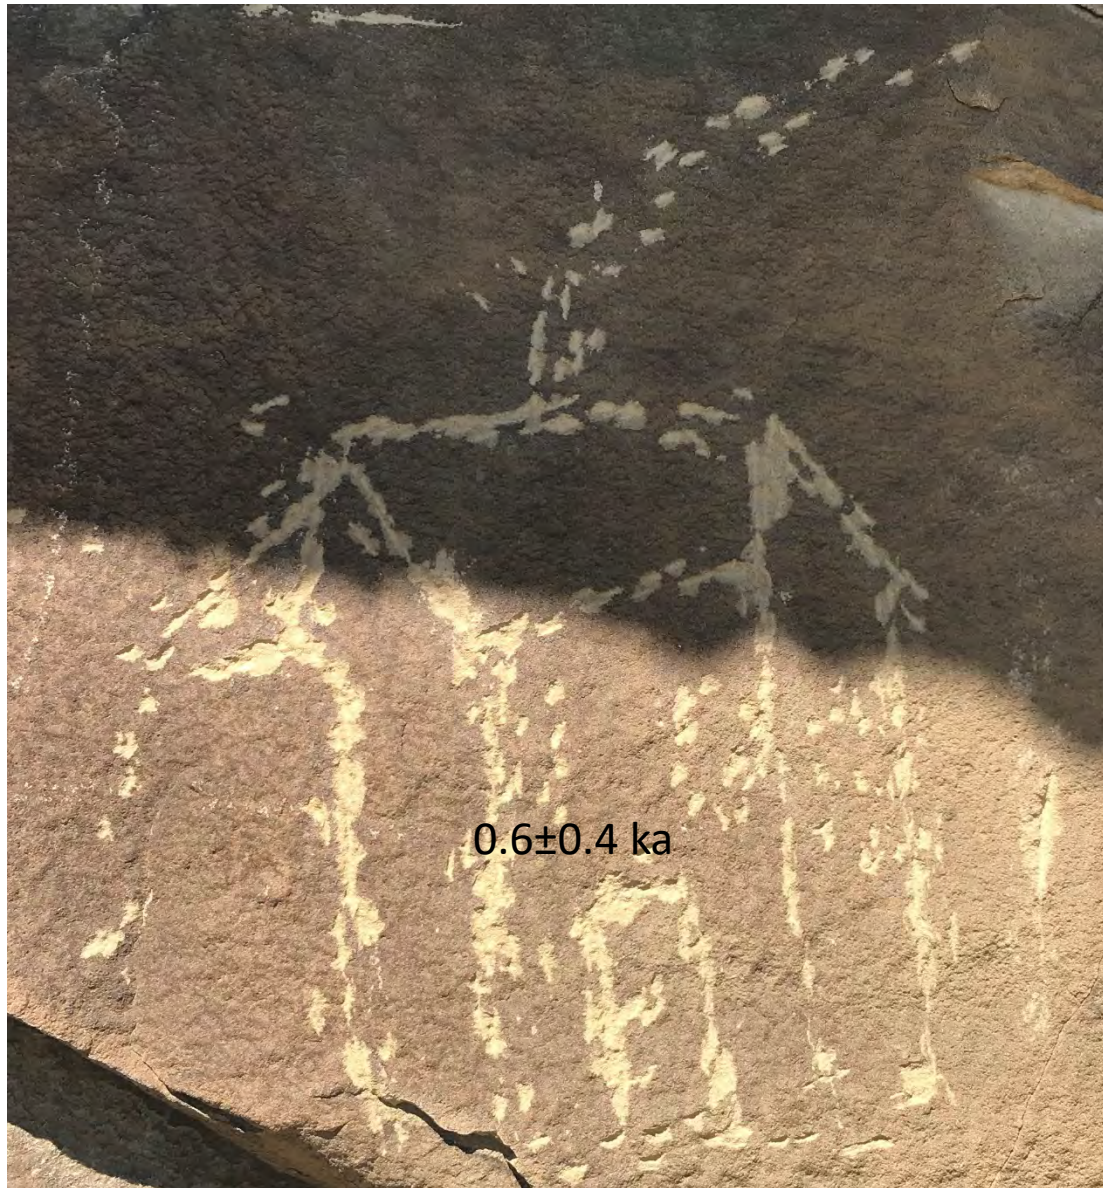

0.6±0.4 ka



LR2426/30

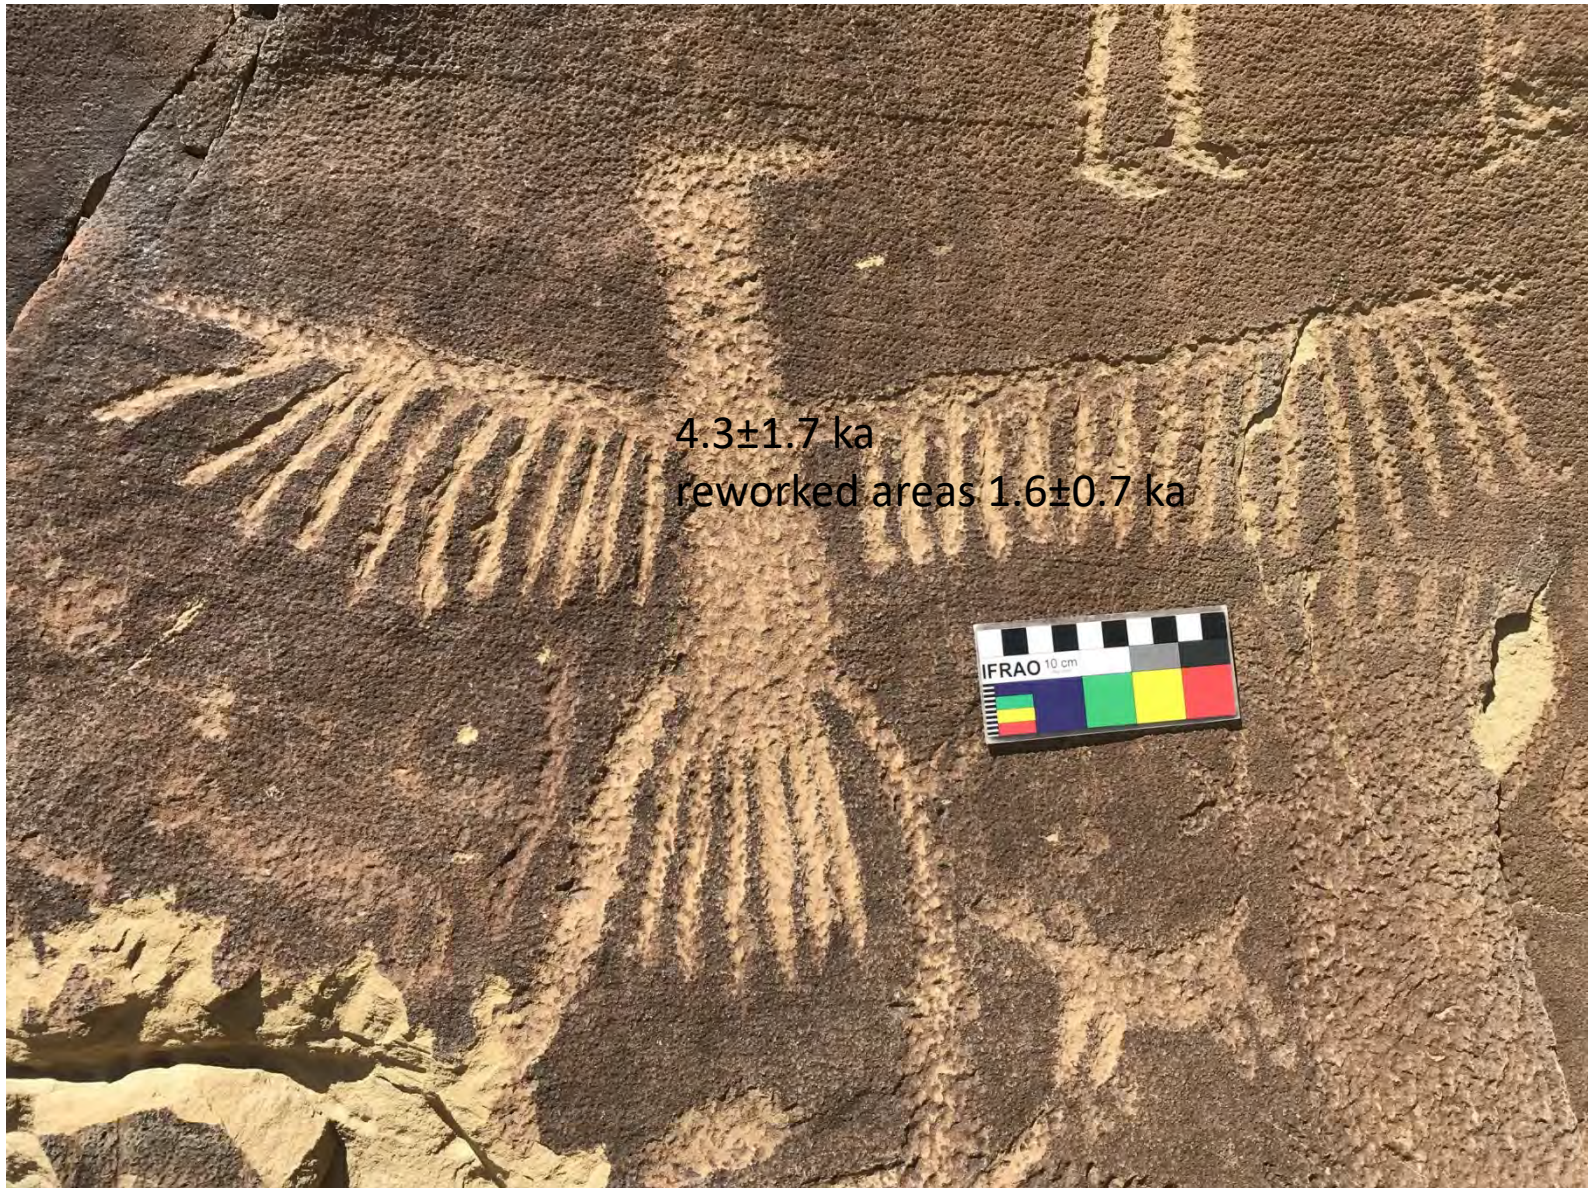

LR2437

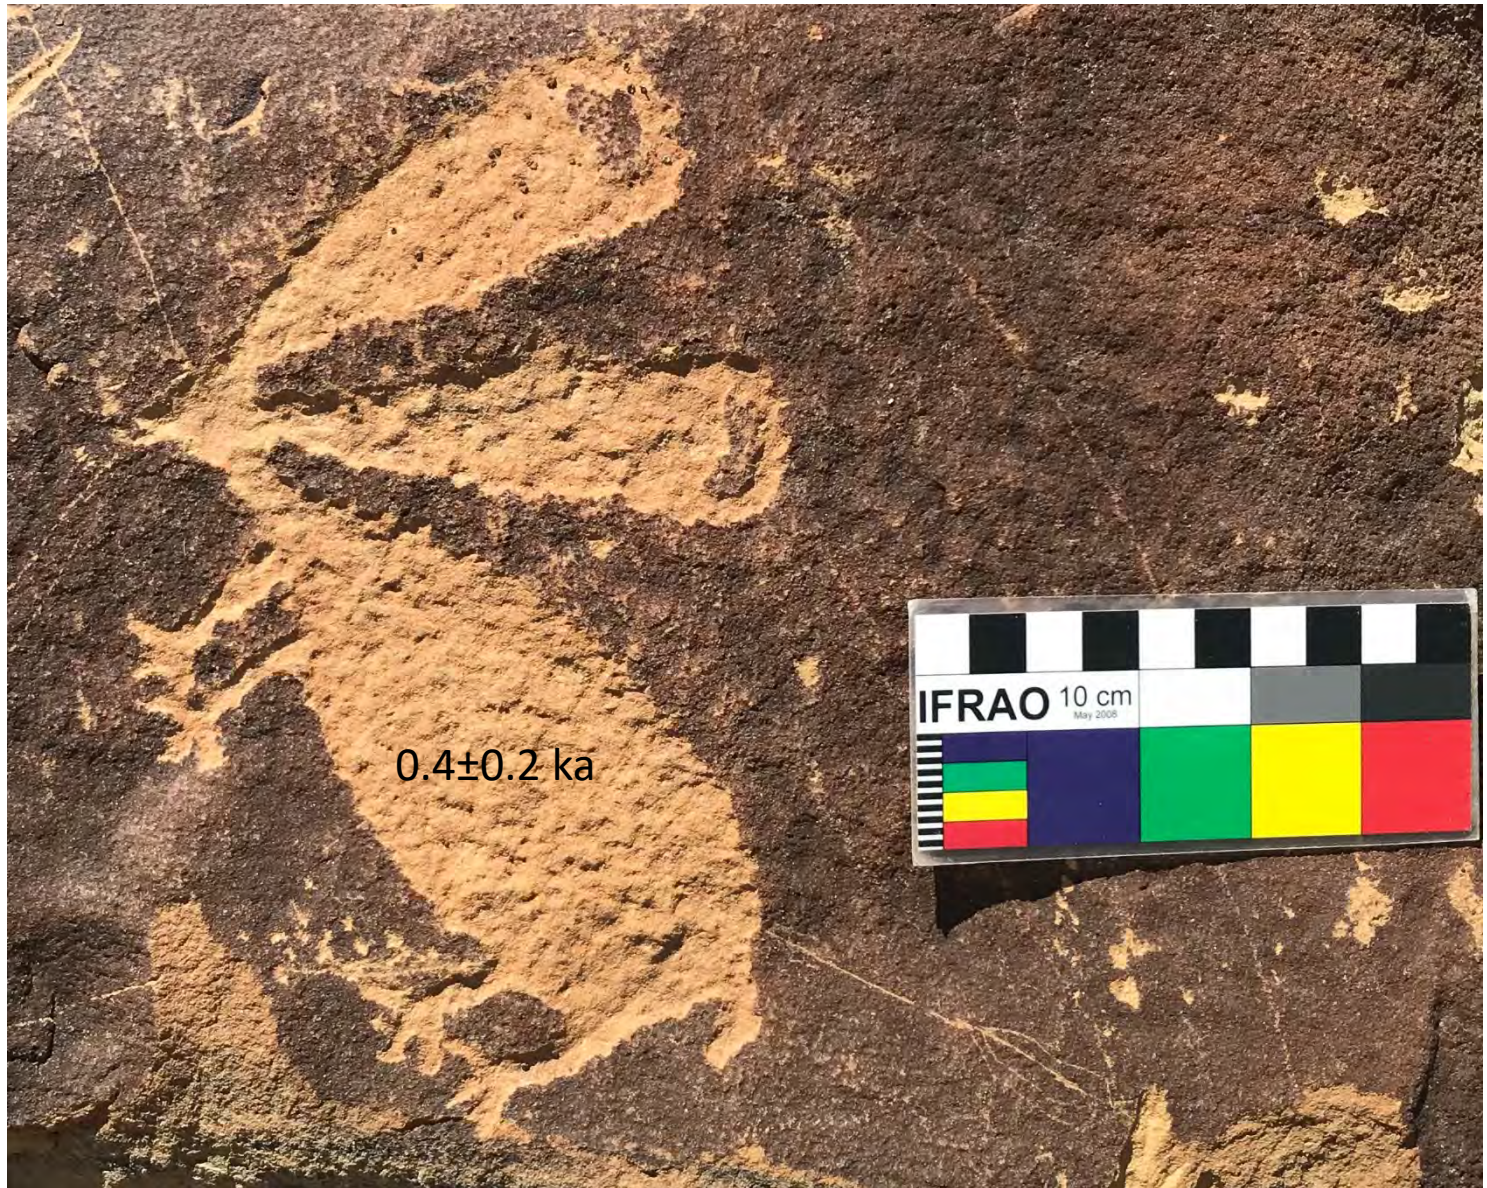

Supplement: pone.0263189.s004.pdf [file pone.0263189.s004.pdf]
