# Supplementary material for: Archaeometric studies on rock art at four sites in the northeastern Great Basin of North America
Source: PubMed Central journal article supplement (PMC8791535; doi:10.1371/journal.pone.0263189), 2022-01-26
Supplement: pone.0263189.s001.pdf [file pone.0263189.s001.pdf]

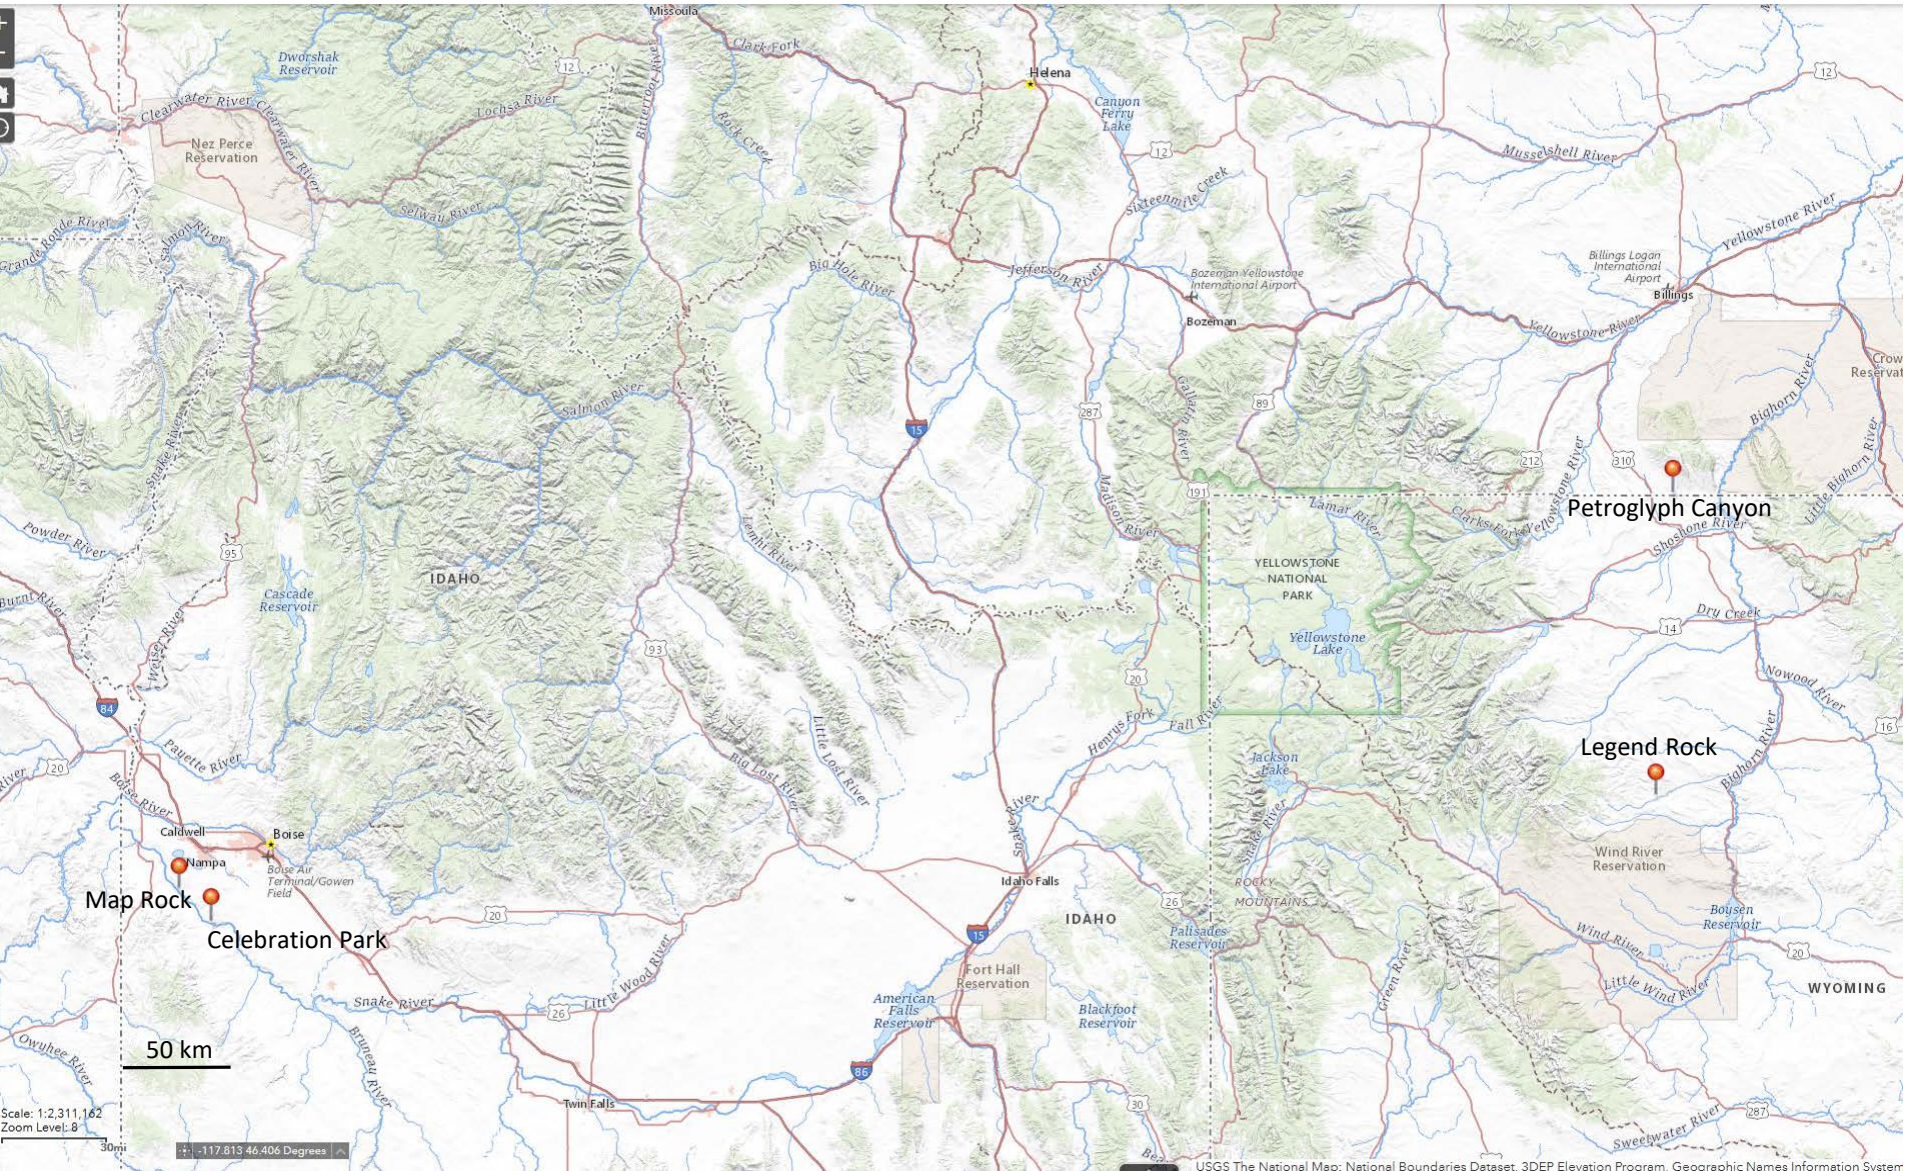

Petroglyph Canyon

Legend Rock

Map Rock

Celebration Park

50 km

Scale: 1:2,311,162  
Zoom Level: 8

-117.613 46.406 Degrees
