# Supplementary material for: Archaeometric studies on rock art at four sites in the northeastern Great Basin of North America
Source: PubMed Central journal article supplement (PMC8791535; doi:10.1371/journal.pone.0263189), 2022-01-26
Supplement: pone.0263189.s003.pdf [file pone.0263189.s003.pdf]

# WSW Side

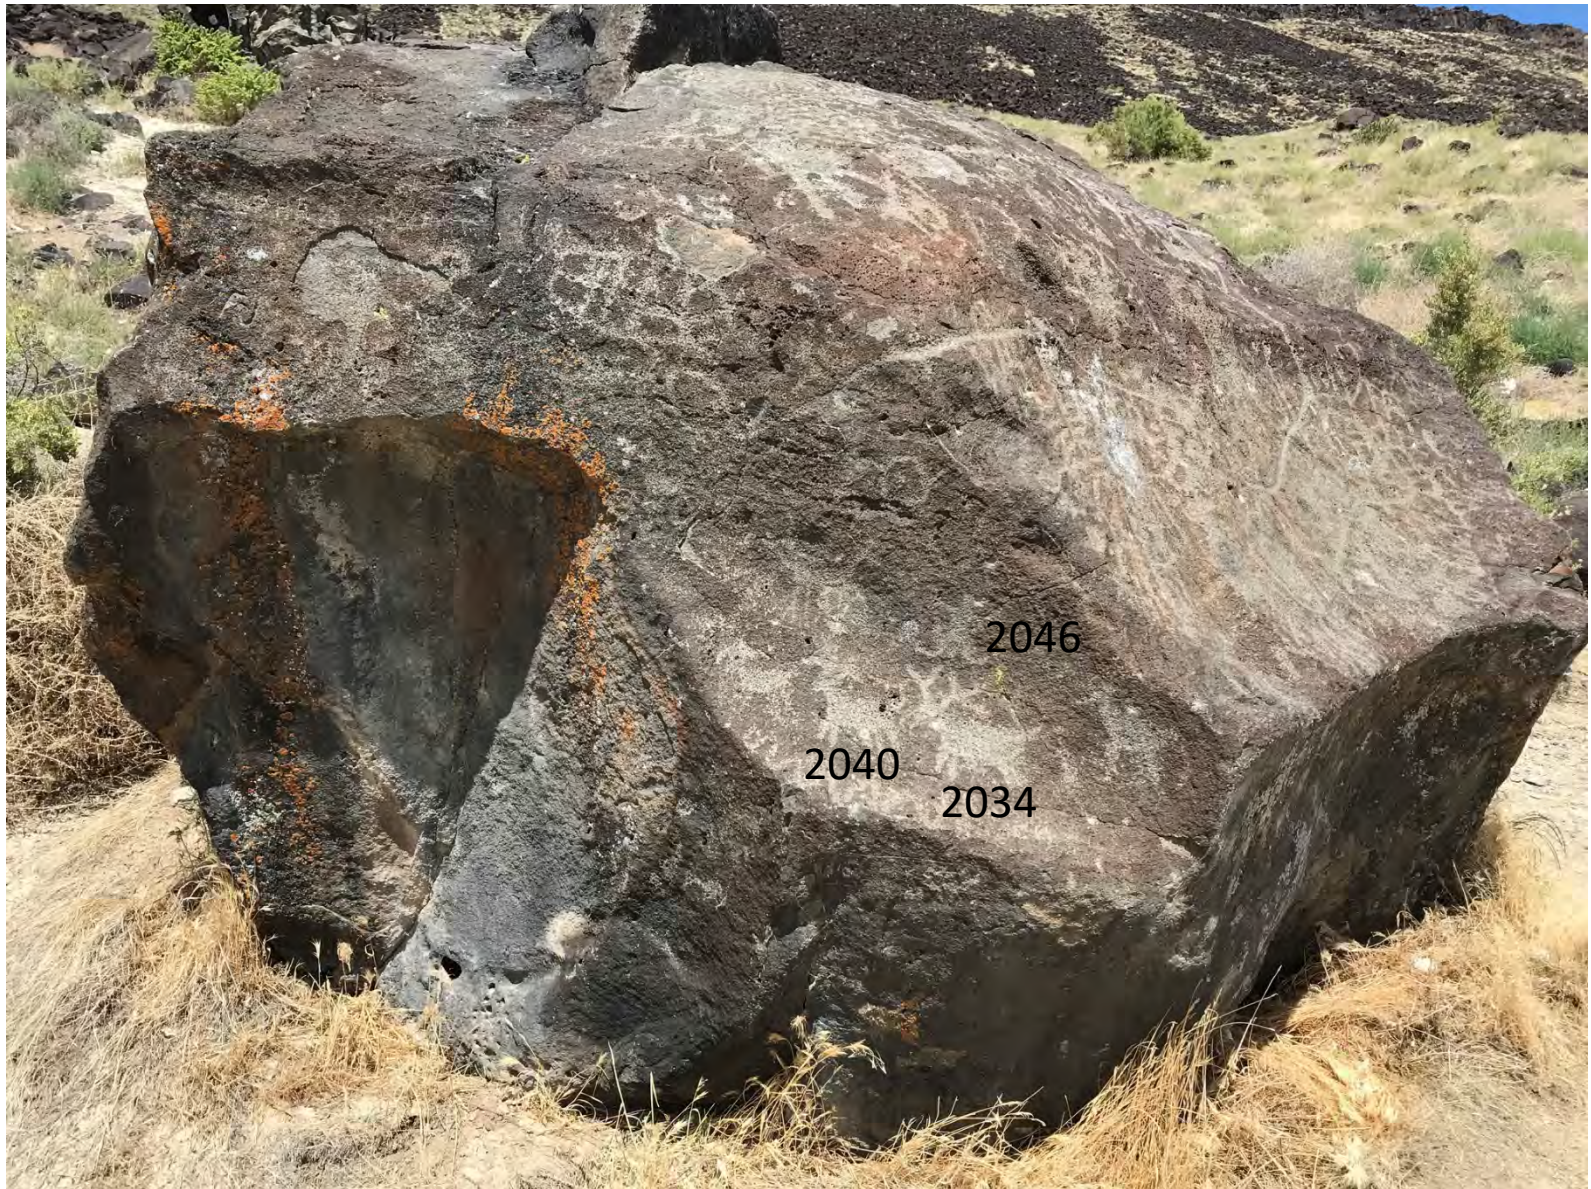

# South Side

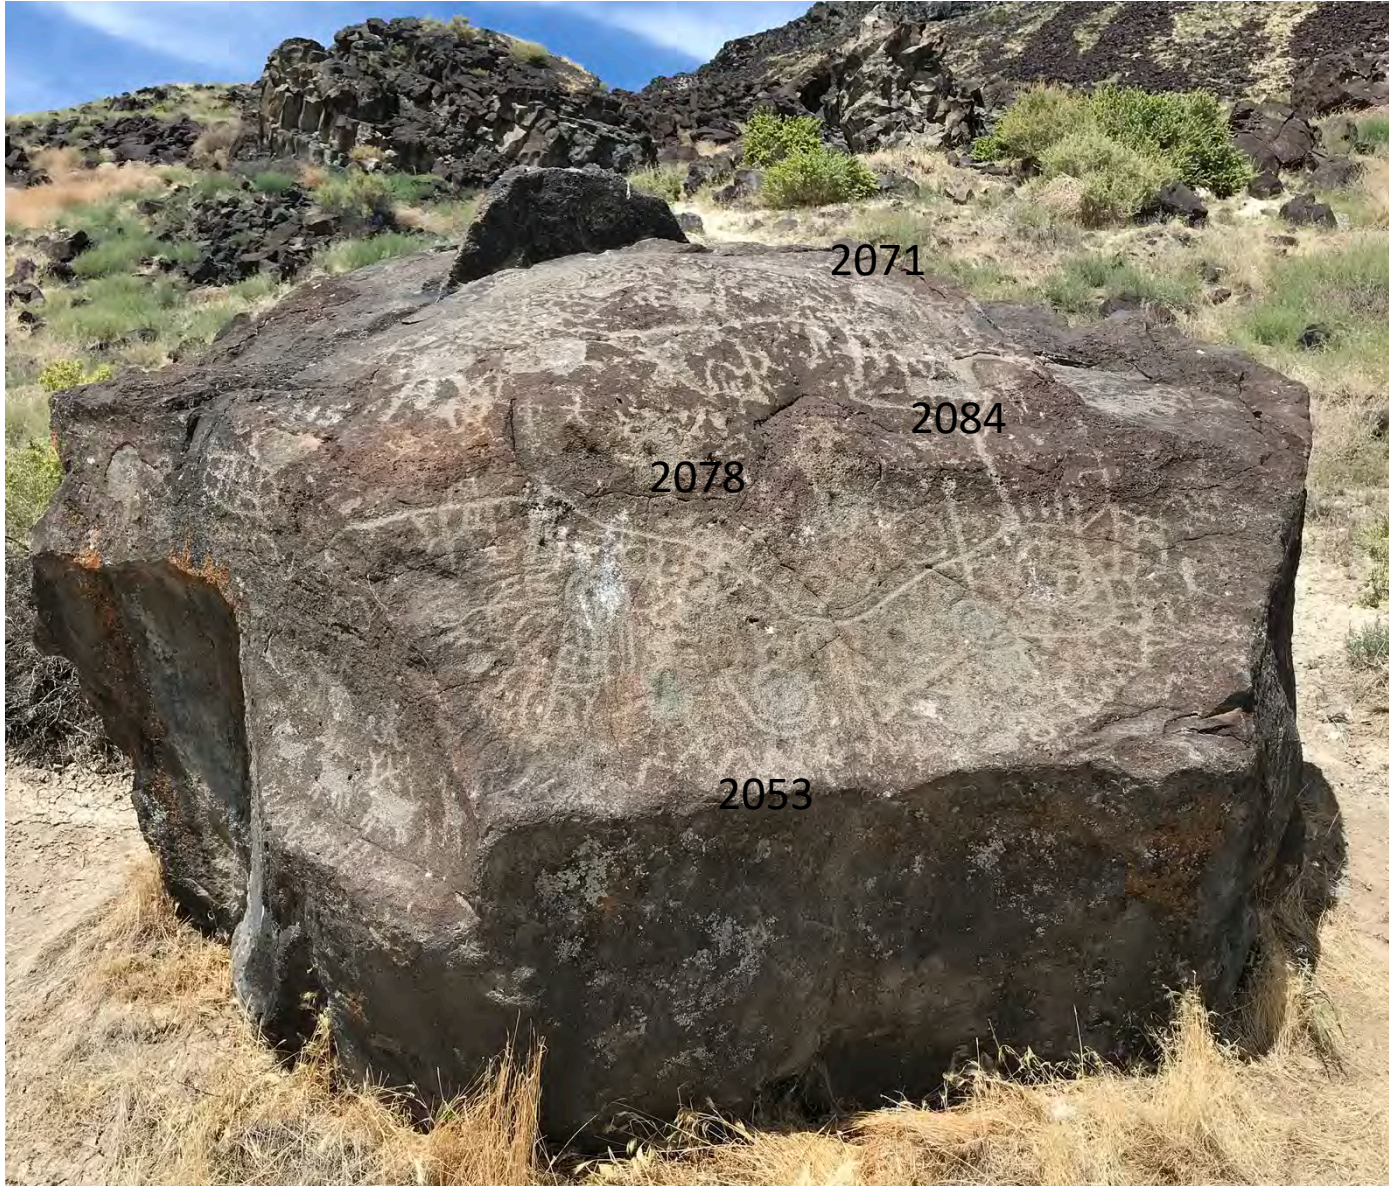

# East Side

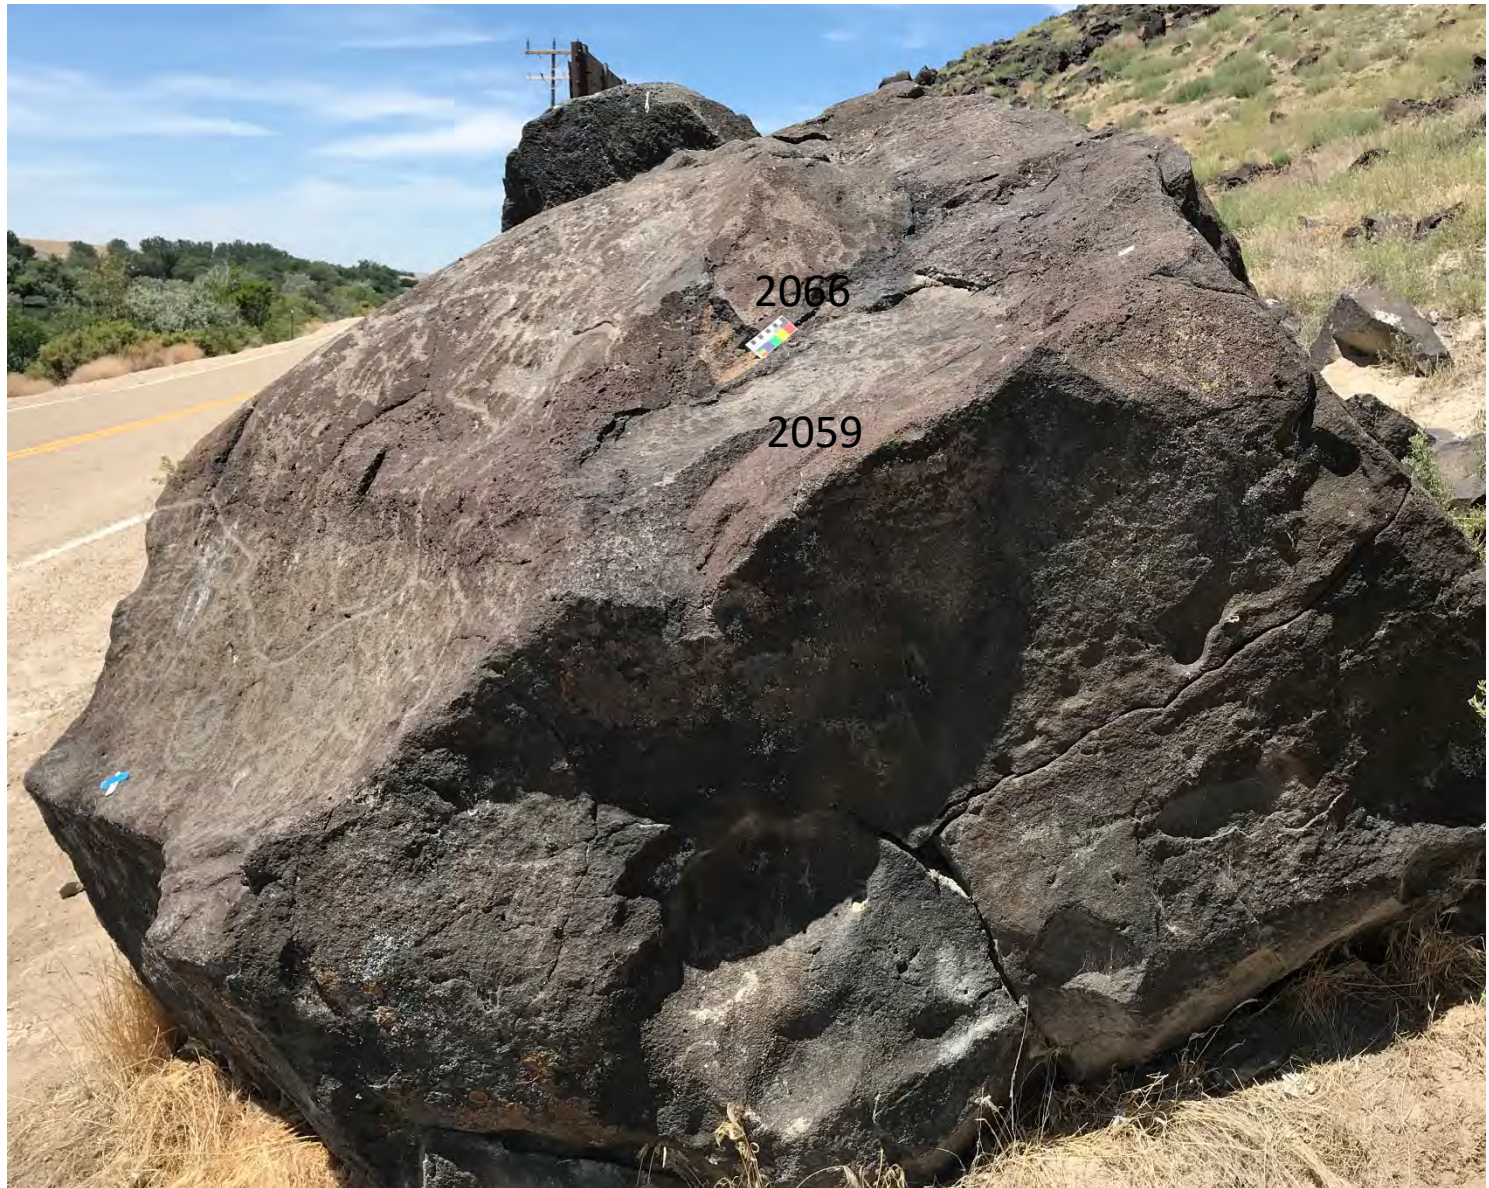

# MR 2034, 2040, 2046

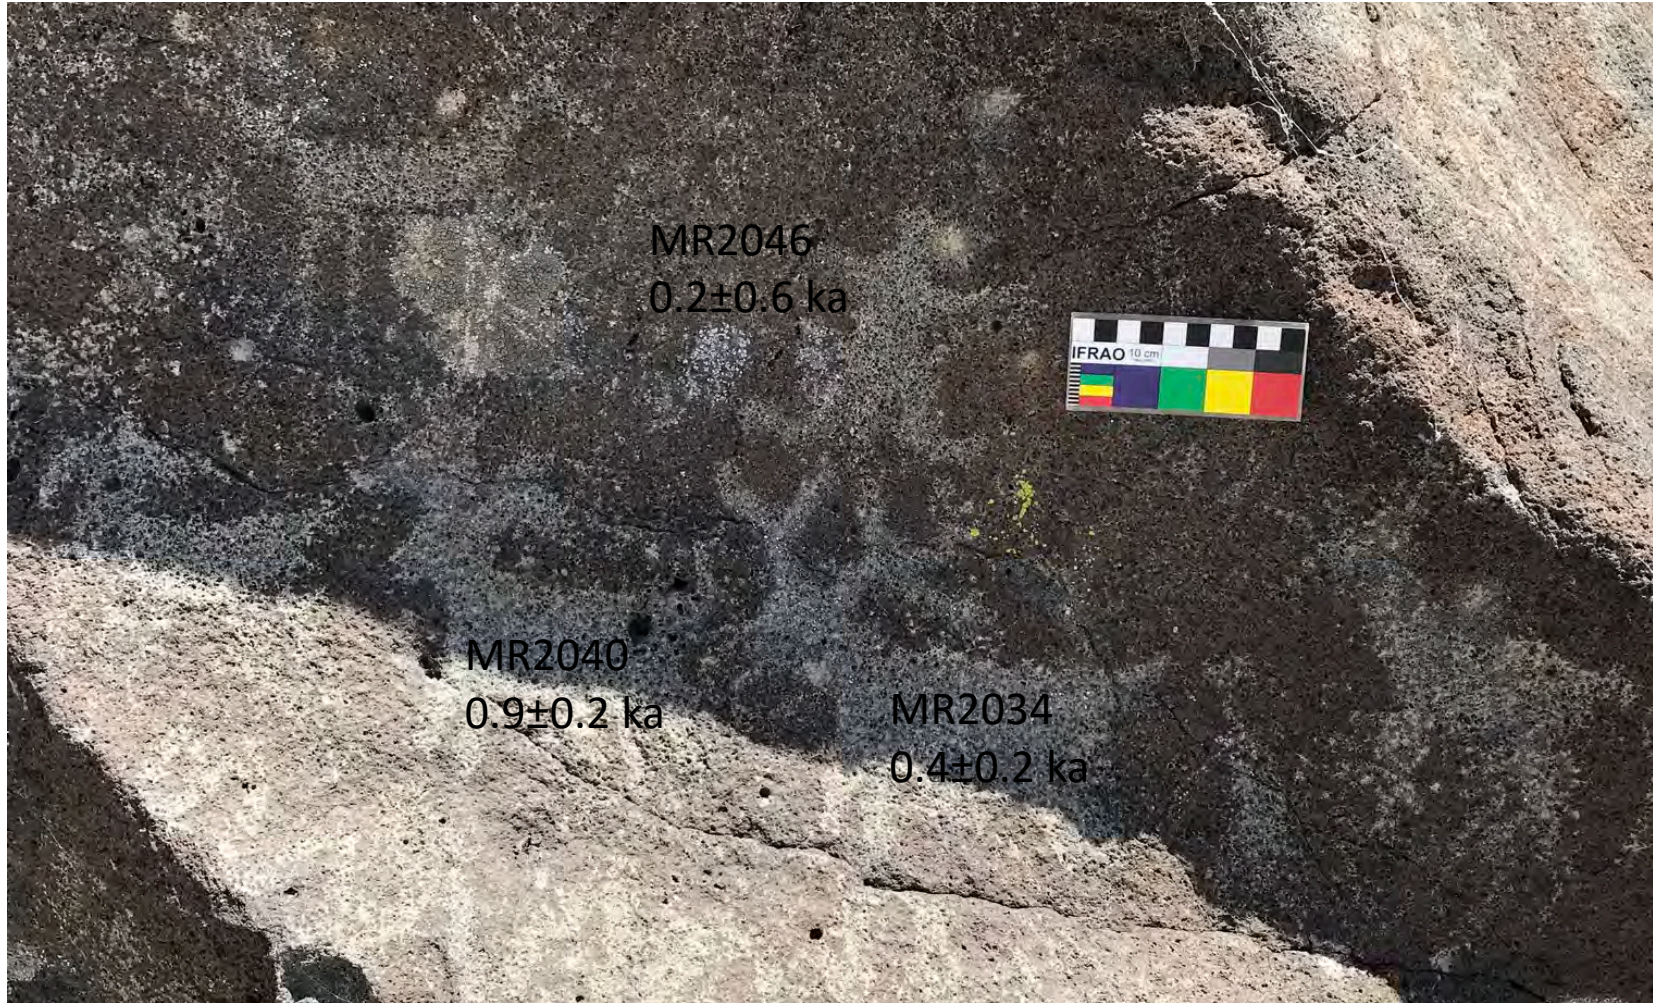

MR2046  
 $0.2 \pm 0.6$  ka

MR2040  
 $0.9 \pm 0.2$  ka

MR2034  
 $0.4 \pm 0.2$  ka

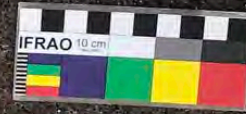

MR 2053

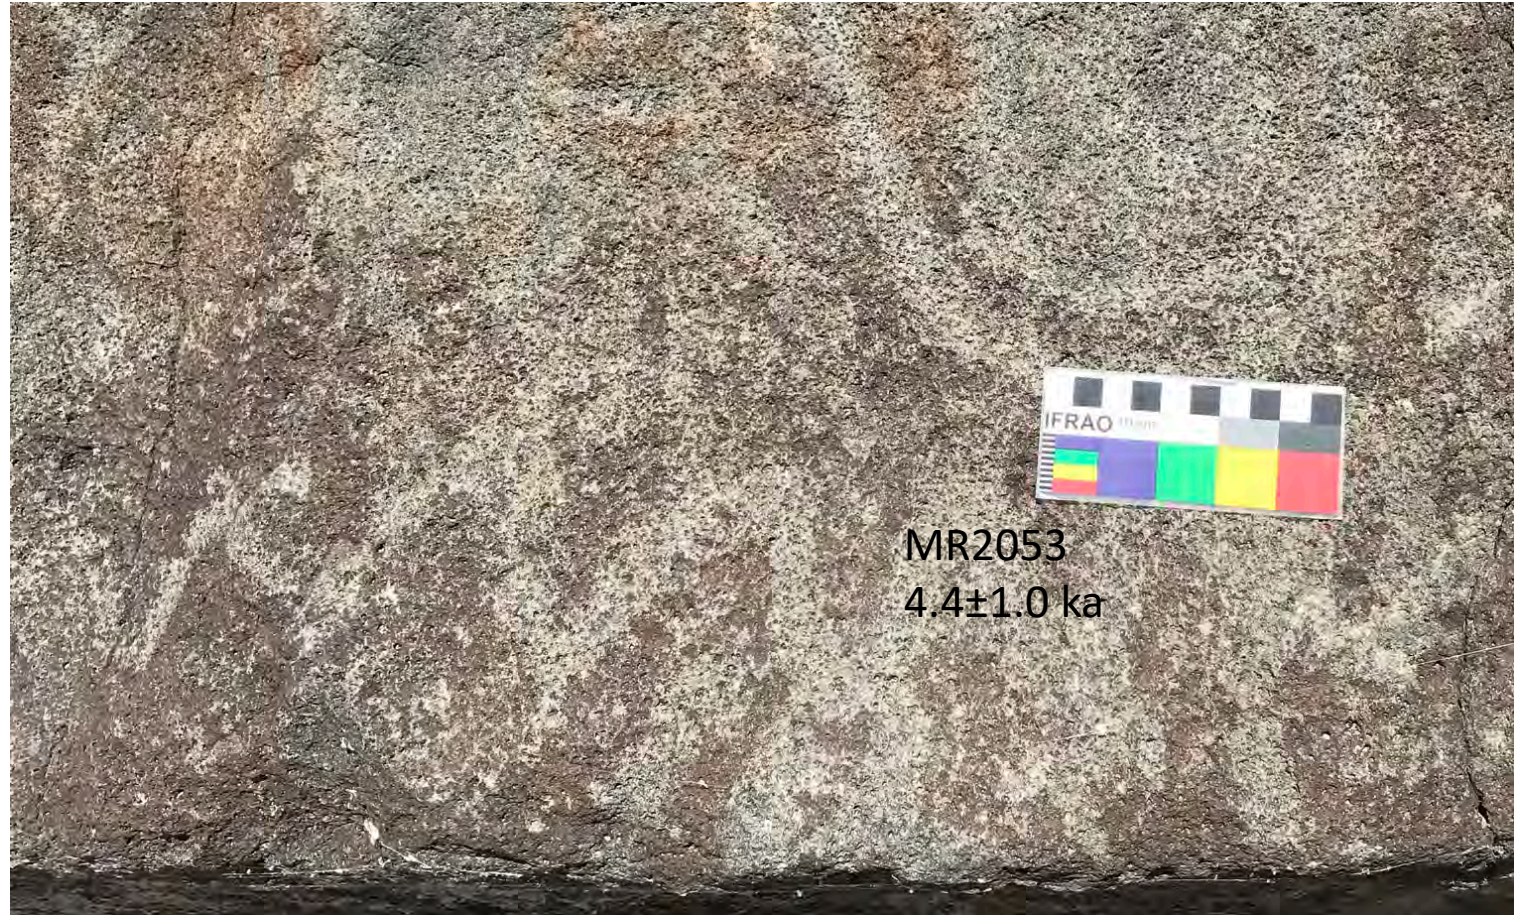

MR2053  
4.4±1.0 ka

MR 2059

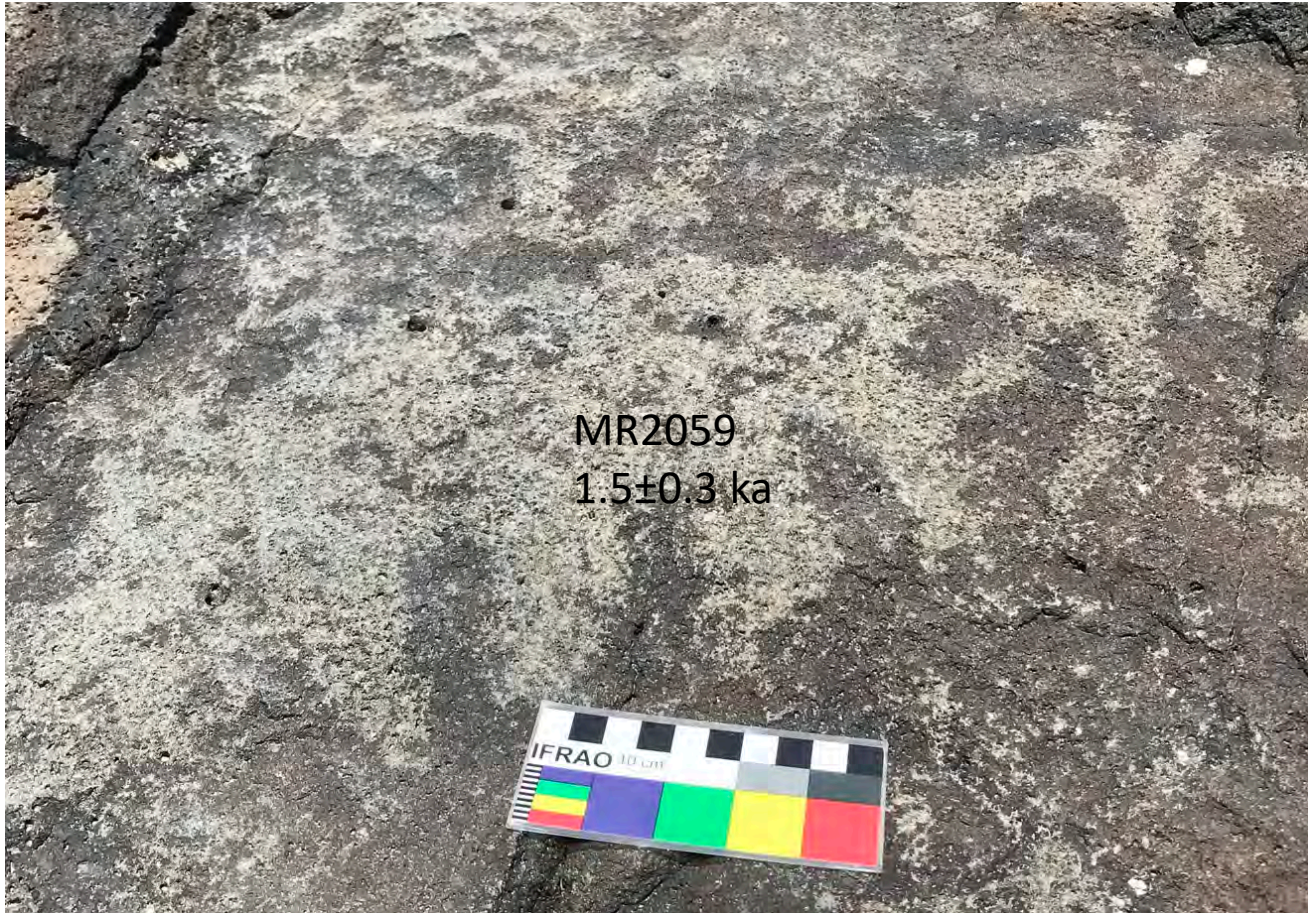

MR2066

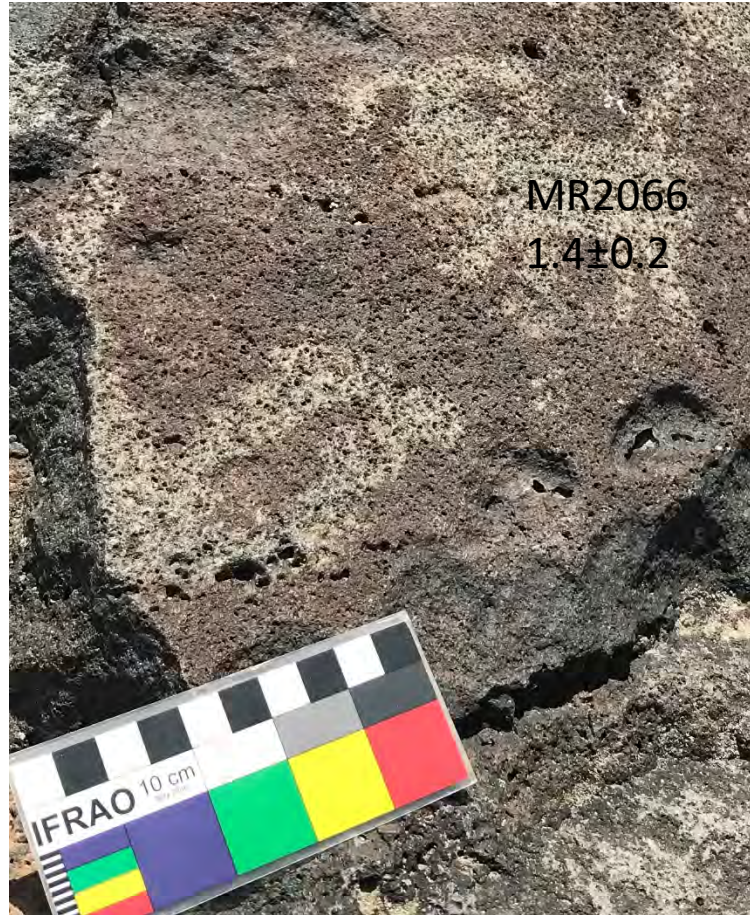

MR2066  
1.4±0.2

MR 2071

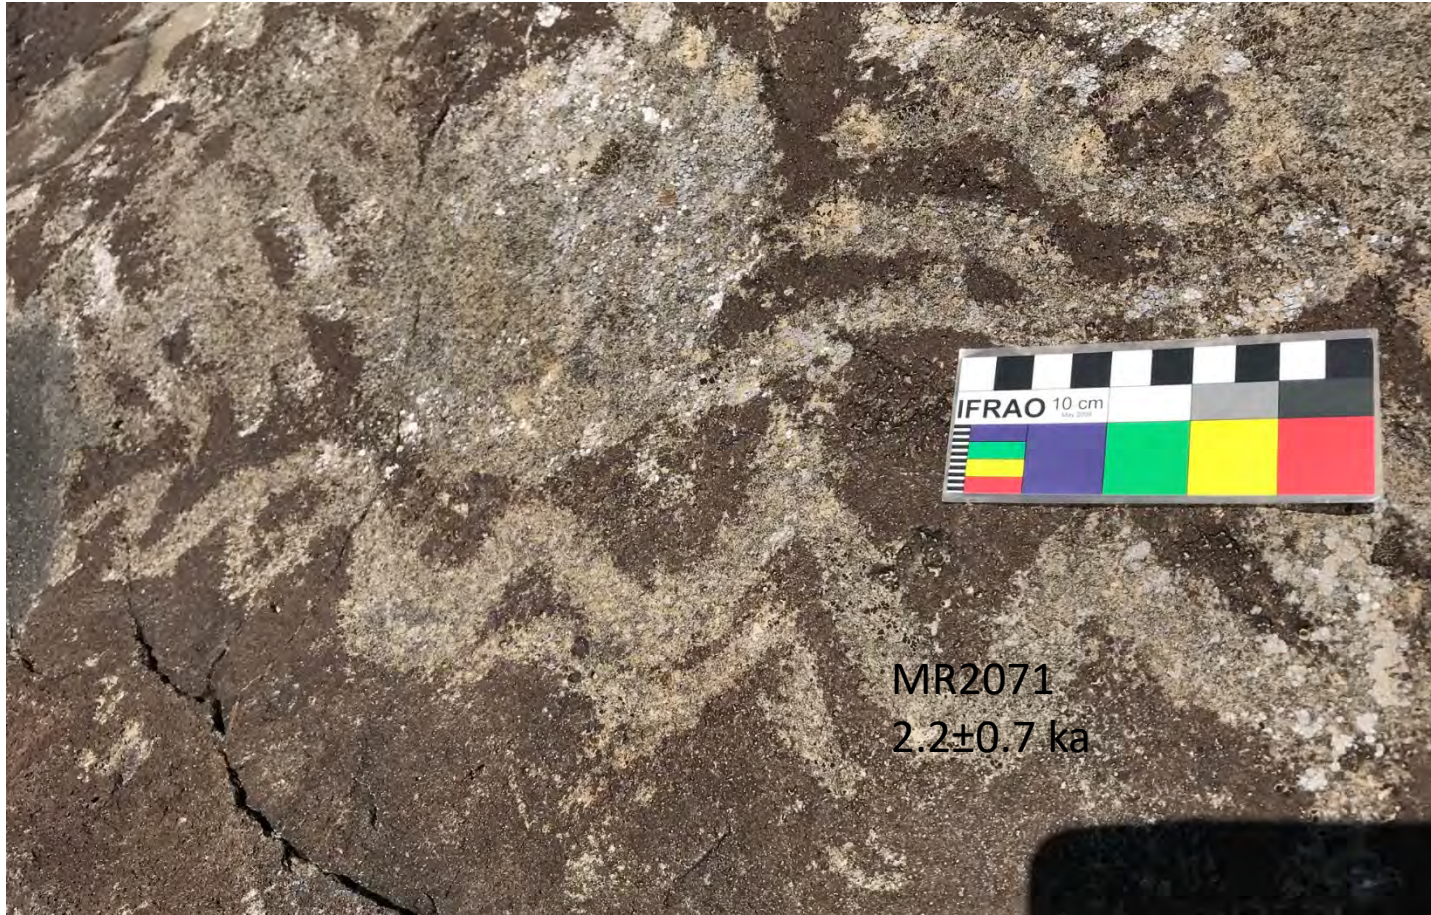

MR2071

2.2±0.7 ka



MR 2078

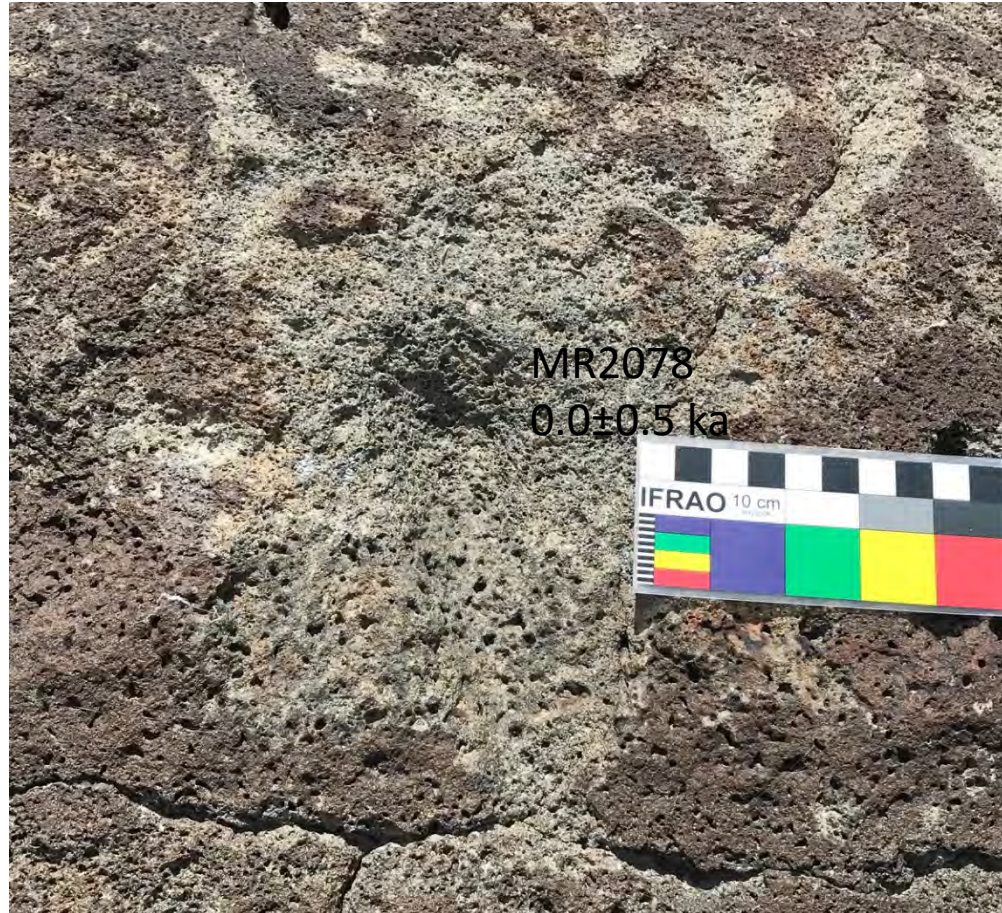

MR 2084

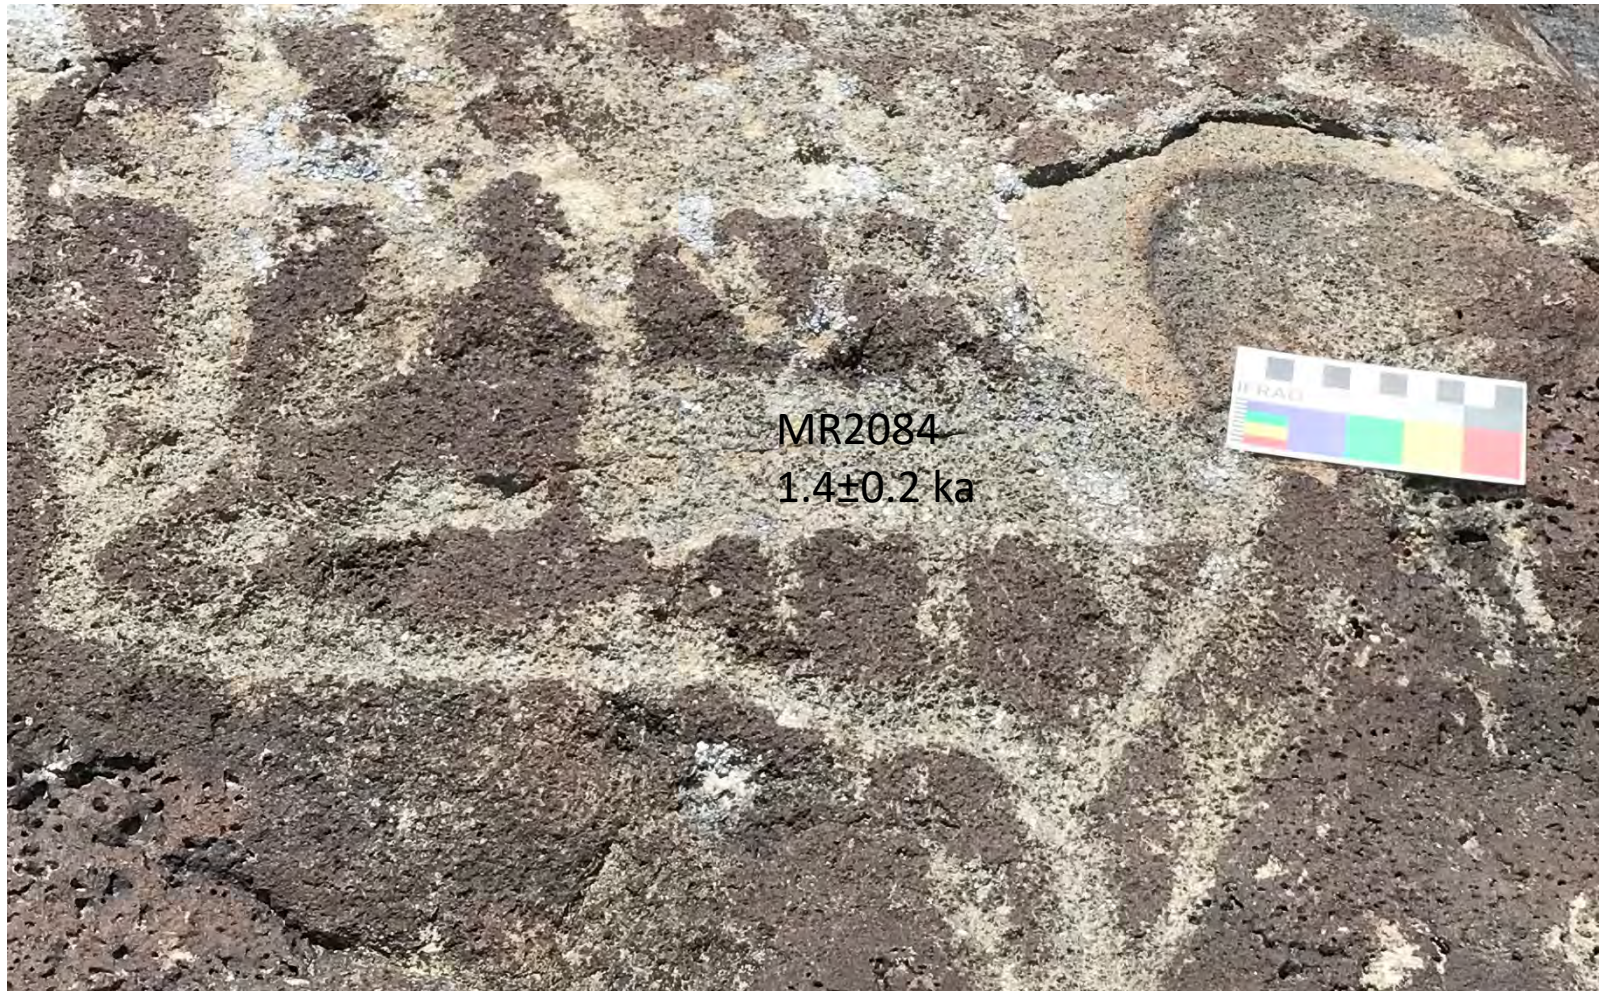

MR2084  
1.4±0.2 ka
