# Supplementary material for: Archaeometric studies on rock art at four sites in the northeastern Great Basin of North America
Source: PubMed Central journal article supplement (PMC8791535; doi:10.1371/journal.pone.0263189), 2022-01-26

PC2447/55

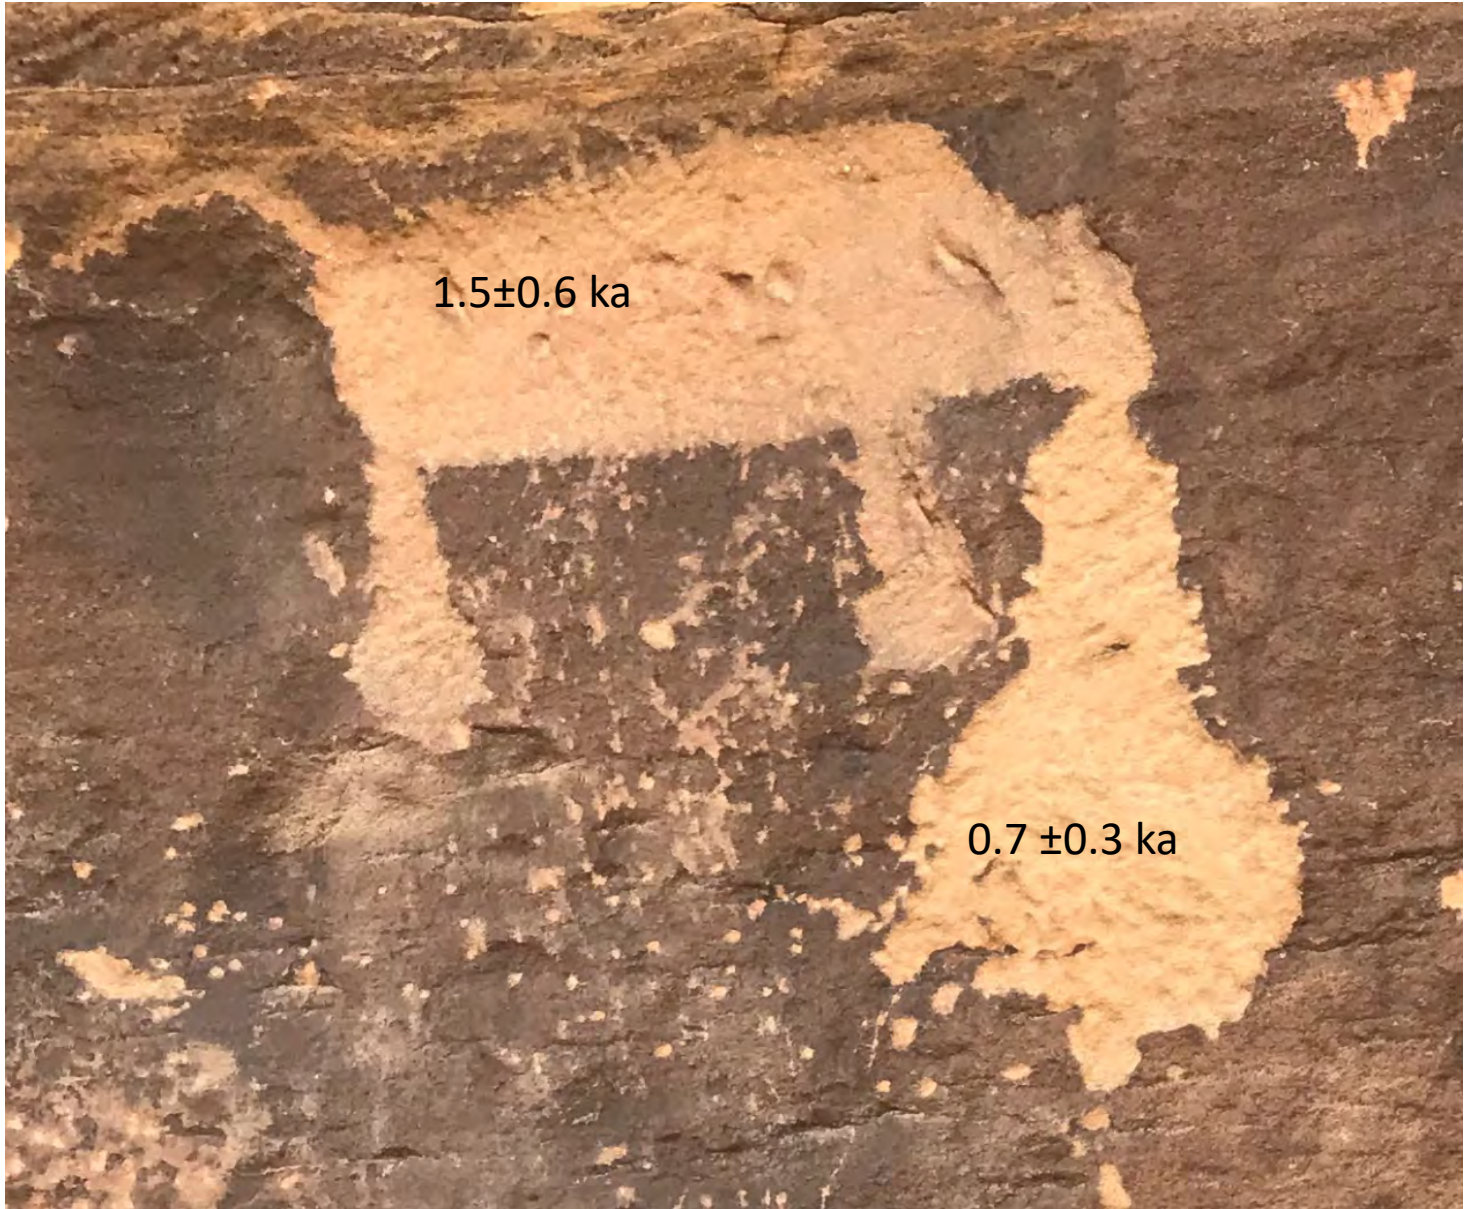

PC2458

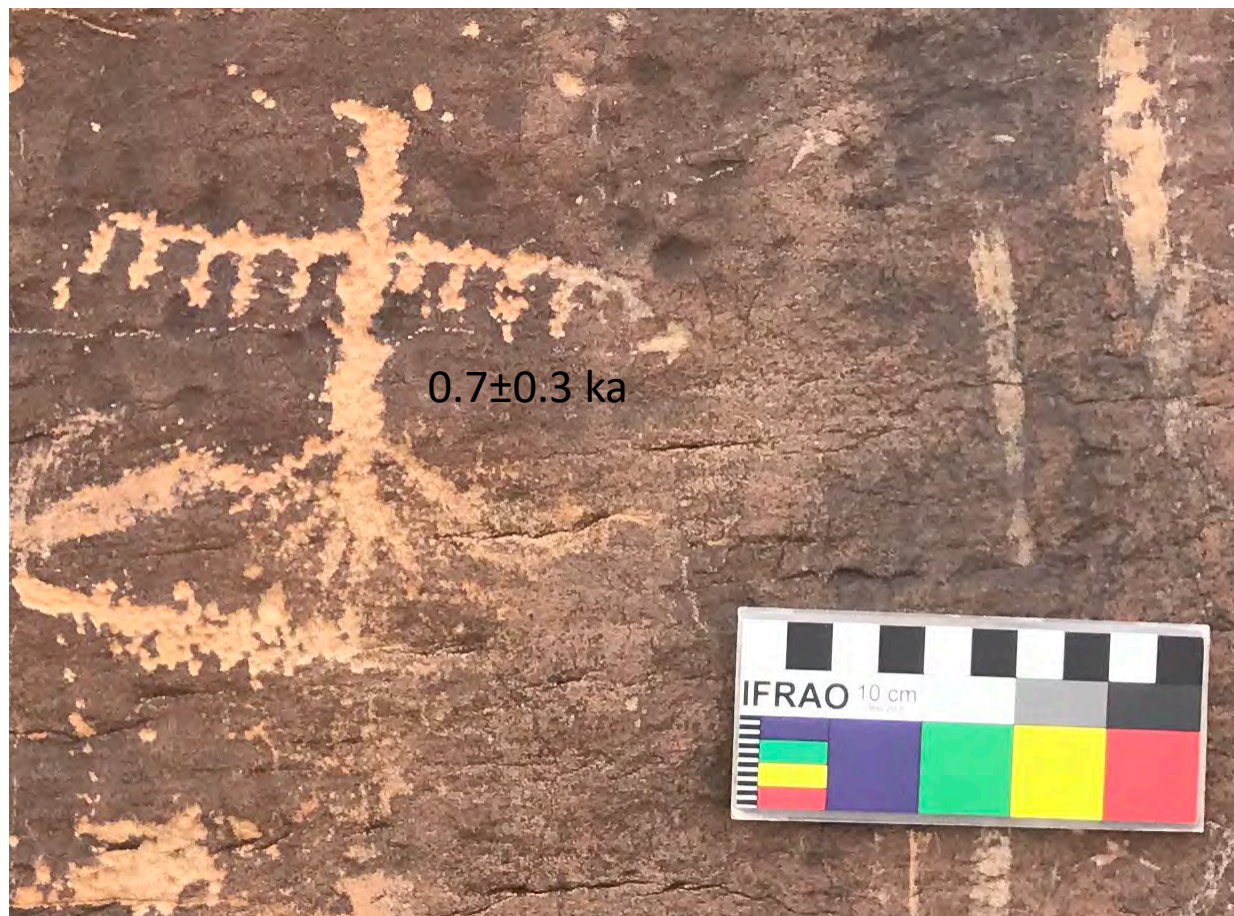

PC2465

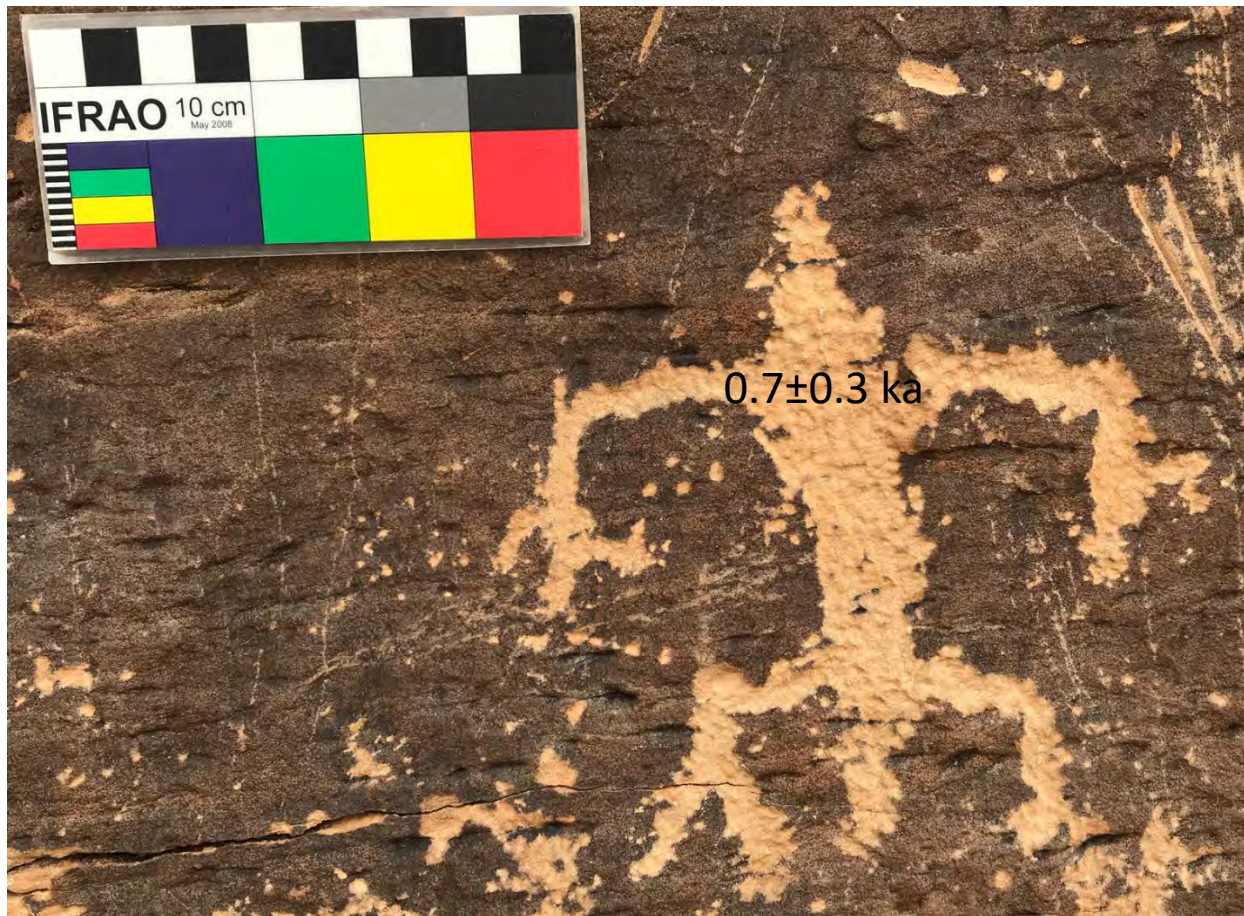

PC2472/80

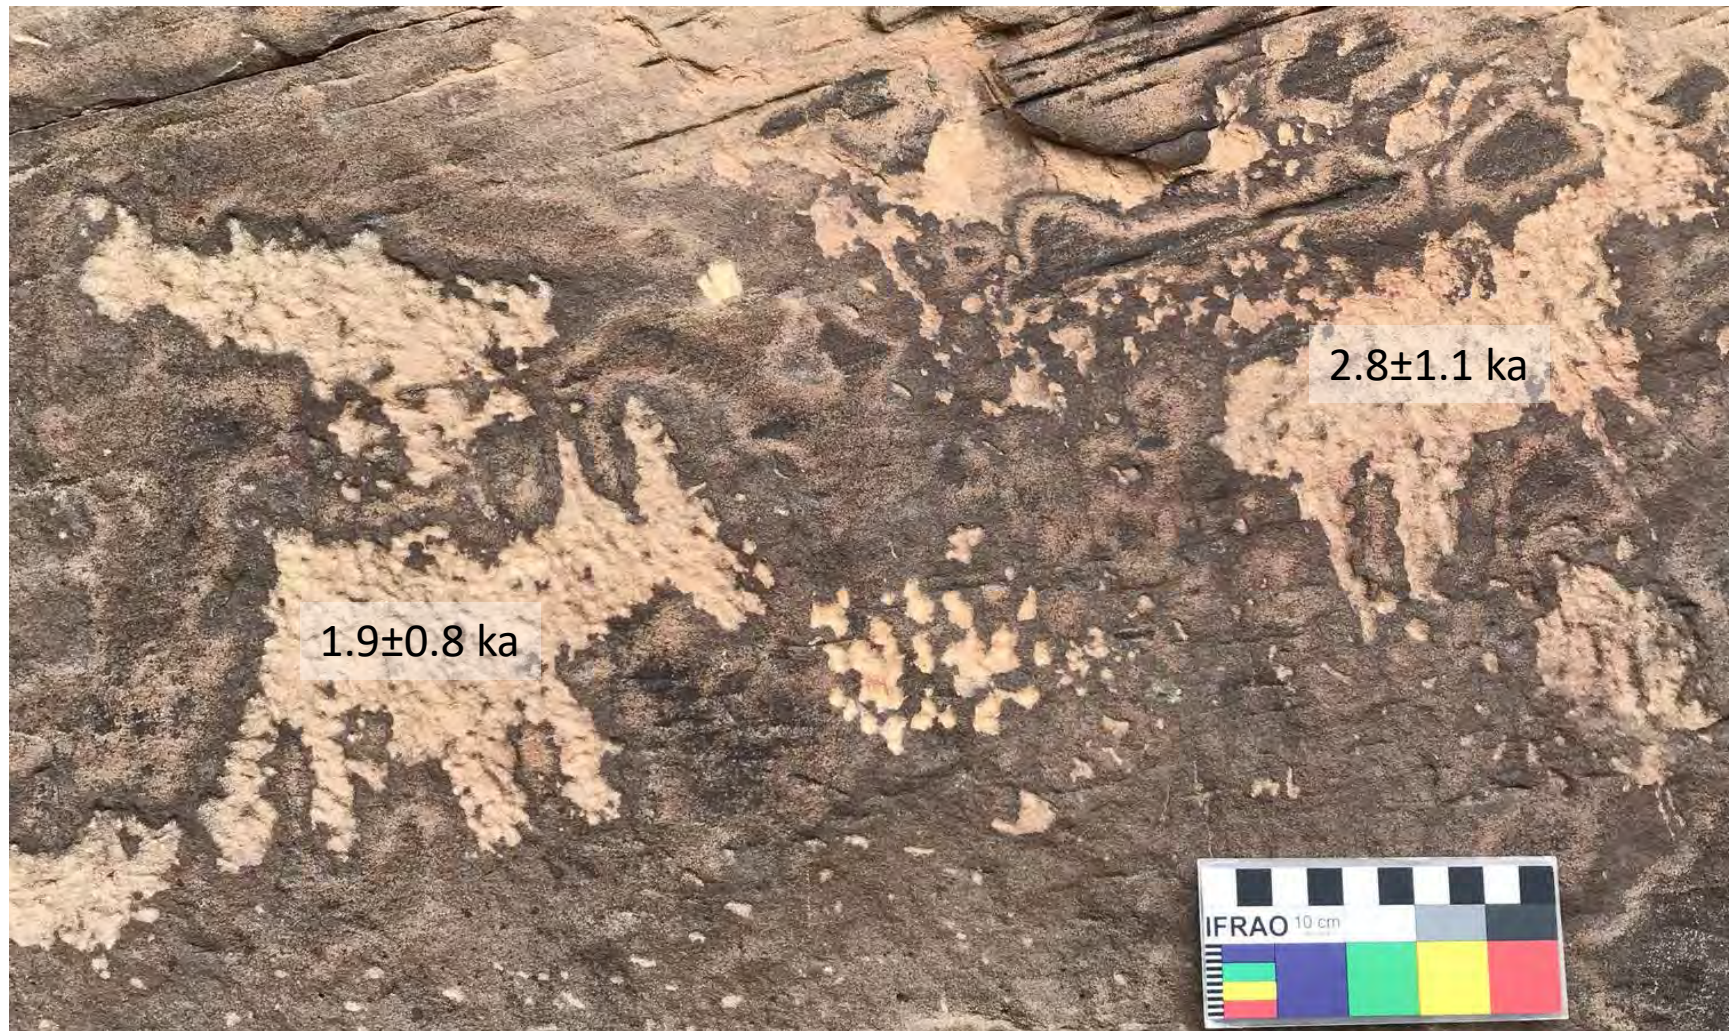

PC2485

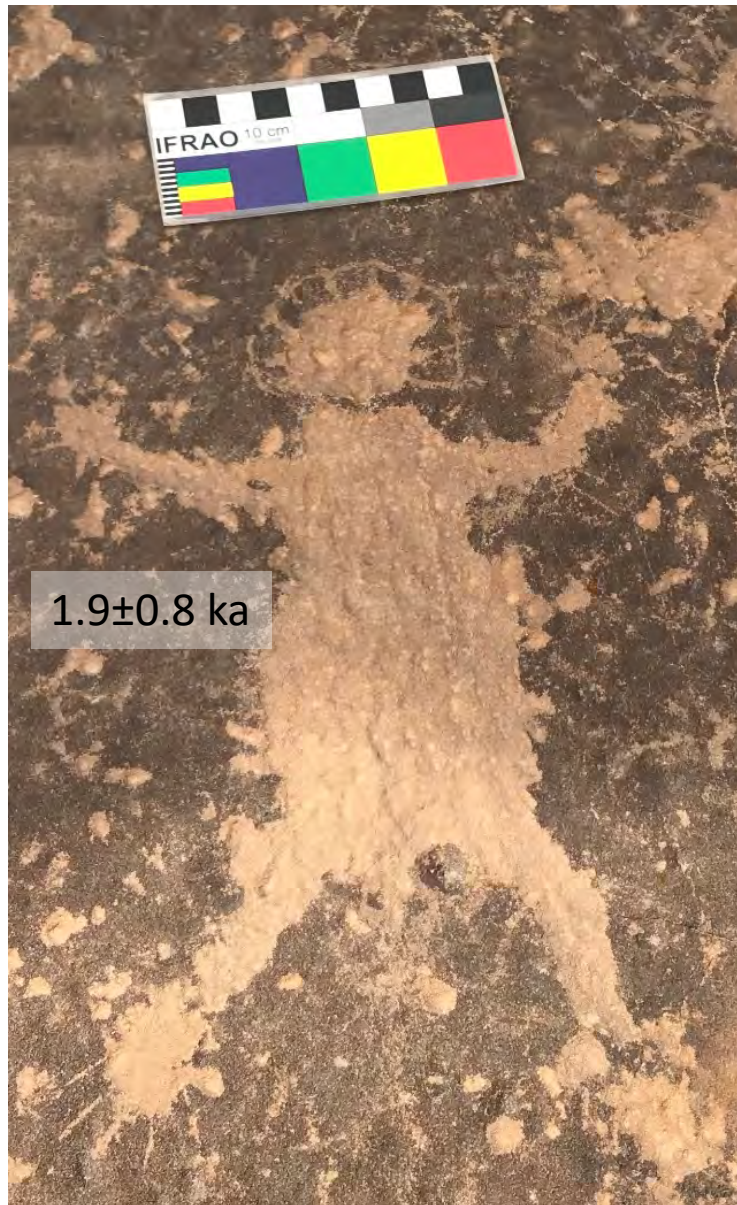

1.9±0.8 ka

PC2493

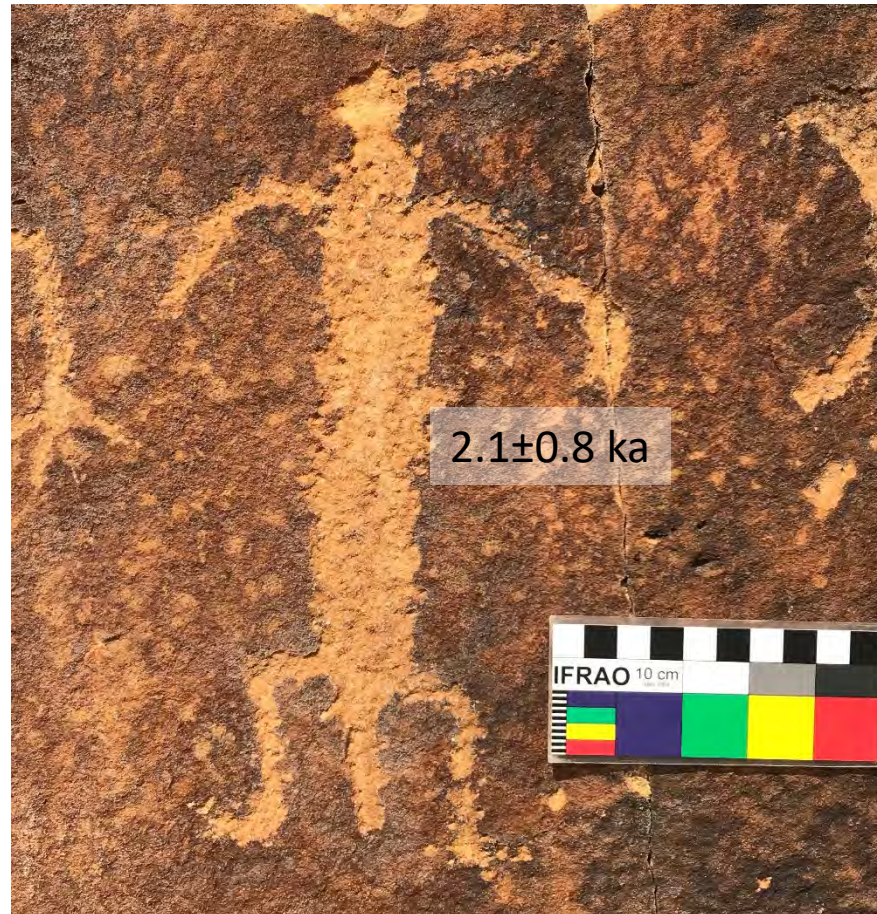

PC2501

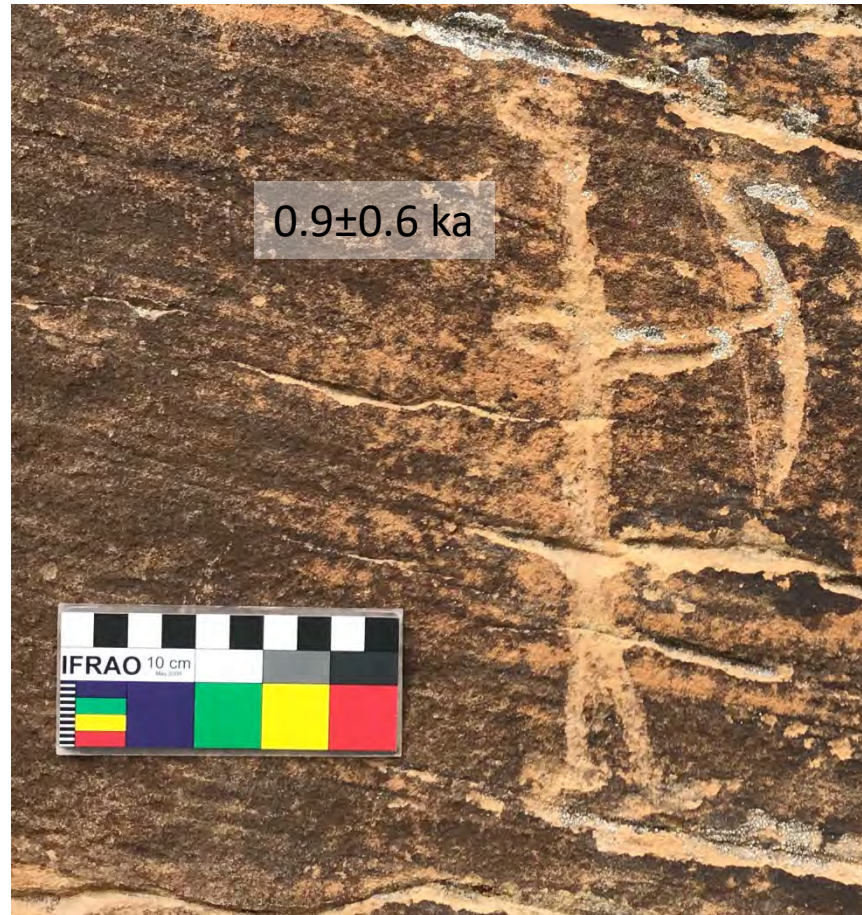

PC2508

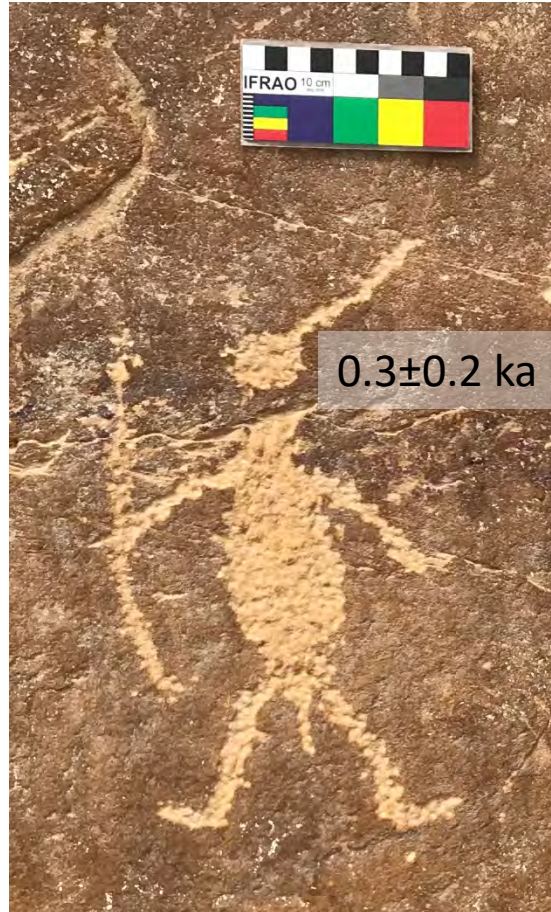

Supplement: pone.0263189.s005.pdf [file pone.0263189.s005.pdf]
